# Supplementary material
Source: MDPI journal article supplement (https://www.mdpi.com/2073-4344/12/9/1006)

# Supporting Information

## Silver(I)-Catalyzed C4-H Amination of 1-Naphthylamine Derivatives with Azodicarboxylates at Room Temperature

Yuxue Zhang, Mengxue Pei, Fan Yang,\* and Yangjie Wu

College of Chemistry, Green Catalysis Center, Henan Key Laboratory of Chemical Biology and Organic Chemistry, Key Laboratory of Applied Chemistry of Henan Universities, Zhengzhou University, Zhengzhou 450052, China.

### Table of Contents

|                                                                                  |            |
|----------------------------------------------------------------------------------|------------|
| <b>1 General Information</b>                                                     | <b>S2</b>  |
| <b>2 Optimization of Reaction Conditions</b>                                     | <b>S2</b>  |
| <b>3 Experimental Section</b>                                                    | <b>S3</b>  |
| 3.1 Typical Procedure for the Synthesis of Substrate 1a                          |            |
| 3.2 Typical Procedure for the C4-H Amination of 1-Naphthylamine Derivatives      |            |
| 3.3 The Functionalization of the product 3                                       |            |
| <b>4 Characterization Data of the Products</b>                                   | <b>S4</b>  |
| <b>5 References</b>                                                              | <b>S17</b> |
| <b>6 The Experiment of Trapping Radicals</b>                                     | <b>S17</b> |
| <b>7 Copies of <sup>1</sup>H and <sup>13</sup>C NMR Spectra for the Products</b> | <b>S18</b> |
| <b>8. Copies of HRMS Spectra for the Products</b>                                | <b>S50</b> |

## 1. General Information

$^1\text{H}$  and  $^{13}\text{C}$  NMR spectra were recorded on a Bruker DPX-400 spectrometer with  $\text{CDCl}_3$  as the solvent and TMS as an internal standard. Chemical shifts are expressed in parts per million ( $\delta$ ) and the signals were reported as s (singlet), d (doublet), t (triplet), m (multiplet), and coupling constants (J) were given in Hz. Chemical shifts as internal standard were referenced to  $\text{CDCl}_3$  ( $\delta = 7.26$  for  $^1\text{H}$  and  $\delta = 77.16$  for  $^{13}\text{C}$  NMR as internal standard). Melting points were measured using a WC-1 microscopic apparatus. High resolution mass spectra were ensured on an Agilent Technologies 1290-6540 HPLC/Accurate-Mass Quadrupole Time-of-Flight LC/MS. All solvents and chemicals were obtained from commercial sources and used as-received without further purification unless otherwise noted.

## 2. Optimization of Reaction Conditions

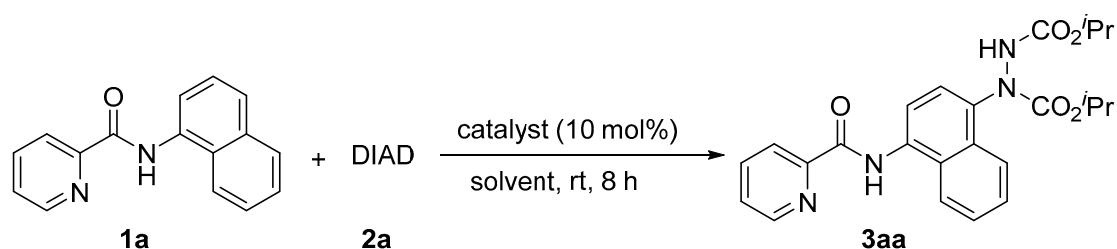

**Table S1** Optimization of Catalyst and Solvent<sup>a</sup>

| Entry | Catalyst                                            | Solvent  | Yield (%) <sup>b</sup> |
|-------|-----------------------------------------------------|----------|------------------------|
| 1     | $\text{Ag}_2\text{O}$                               | DCE      | 80                     |
| 2     | $\text{Ag}_2\text{O}$                               | dioxane  | 90                     |
| 3     | $\text{Ag}_2\text{O}$                               | acetone  | 97                     |
| 4     | $\text{Ag}_2\text{O}$                               | THF      | 90                     |
| 5     | $\text{Ag}_2\text{O}$                               | DME      | 80                     |
| 6     | $\text{Ag}_2\text{O}$                               | DCM      | <5                     |
| 7     | $\text{Ag}_2\text{O}$                               | methanol | <5                     |
| 8     | $\text{Ag}_2\text{O}$                               | DMF      | <5                     |
| 9     | $\text{Ag}_2\text{O}$                               | DMSO     | <5                     |
| 10    | $\text{Ag}_2\text{O}$                               | EtOAc    | <5                     |
| 11    | $\text{Ag}_2\text{O}$                               | MeCN     | <5                     |
| 12    | $\text{CuO}$                                        | acetone  | <5                     |
| 13    | $\text{Cu}_2\text{O}$                               | acetone  | <5                     |
| 14    | $\text{Fe}_2\text{O}_3$                             | acetone  | <5                     |
| 15    | $\text{AgOAc}$                                      | acetone  | <5                     |
| 16    | $\text{CuOAc}$                                      | acetone  | <5                     |
| 17    | $\text{NiCl}_2 \cdot \text{H}_2\text{O}$            | acetone  | <5                     |
| 18    | $\text{Co}(\text{OAc})_2 \cdot 6\text{H}_2\text{O}$ | acetone  | <5                     |
| 19    | -                                                   | acetone  | <5                     |

<sup>a</sup>Reaction conditions: **1a** (0.1 mmol), **2a** (0.2 mmol), catalyst (10 mol%) in solvent (1mL) at room temperature for 8 h. <sup>b</sup>Isolated yield based on **1a**. DCE (1,2-dichloroethane), THF

(tetrahydrofuran), DME (1,2-dimethoxyethane), DMF (N,N-dimethylformamide), DMSO (dimethyl sulfoxide), EtOAc (ethyl acetate).

**Table S2** Optimization of Catalyst Loading<sup>a</sup>

| Entry | Ag <sub>2</sub> O | Solvent | Yield (%) <sup>b</sup> |
|-------|-------------------|---------|------------------------|
| 1     | 5 mol%            | acetone | 46                     |
| 2     | 20 mol%           | acetone | 91                     |
| 3     | 50 mol%           | acetone | 88                     |

<sup>a</sup>Reaction conditions: **1a** (0.1 mmol), **2a** (0.2 mmol), catalyst (x mol%) in solvent (1 mL) at room temperature for 8 h. <sup>b</sup>Isolated yield based on **1a**.

**Table S3** Optimization of Time<sup>a</sup>

| Entry | Ag <sub>2</sub> O | Solvent | Time (h) | Yield (%) <sup>b</sup> |
|-------|-------------------|---------|----------|------------------------|
| 1     | 10 mol%           | acetone | 4        | 72                     |
| 2     | 10 mol%           | acetone | 6        | 81                     |
| 3     | 10 mol%           | acetone | 7        | 88                     |

<sup>a</sup>Reaction conditions: **1a** (0.1 mmol), **2a** (0.2 mmol), catalyst (10 mol%) in solvent (1 mL) at room temperature for x h. <sup>b</sup>Isolated yield based on **1a**.

### 3 Experimental Section

#### 3.1 Typical Procedure for the Synthesis of Substrate **1a**

A 100 mL round-bottom flask was equipped with a magnetic stir bar and charged with 1-naphthylamine (20 mmol, 2.86 g), picolinic acid (1.1 equiv, 2.70 g), N,N-dimethyl-4-aminopyridine (DMAP, 0.1 equiv, 0.244 g) dissolved in 30 mL anhydrous CH<sub>2</sub>Cl<sub>2</sub> at 0 °C. After 1-ethyl-3-[3-(N,N-dimethylamino)propyl]carbodiimide hydrochloride (EDCI, 4.2 g, 1.1 equiv) in CH<sub>2</sub>Cl<sub>2</sub> (20 mL) was added dropwise to the solution under a nitrogen atmosphere, the reaction was then warmed to room temperature, stirred for 12 h and quenched with water (30 mL). The reaction mixture was extracted with CH<sub>2</sub>Cl<sub>2</sub> (3 × 20 mL) and the combined organic solvent was dried over anhydrous Na<sub>2</sub>SO<sub>4</sub>, filtered and concentrated under reduced pressure. The resulting residue was purified by column chromatography (ethyl acetate/hexane = 1/5) to afford pure **1a** as a white solid (4.42 g, 89%).

All amides **1** as the substrates were prepared from the corresponding 1-naphthylamine derivatives and 2-picolinic acid according to the reported procedure.<sup>1</sup>

#### 3.2 Typical Procedure for the C4-H Amination of 1-Naphthylamine Derivatives

A Schlenk tube was equipped with a magnetic stir bar and charged with N-(naphthalen-1-yl)picolinamide **1a** (0.1 mmol), **2a** (0.2 mmol, 2 equiv), Ag<sub>2</sub>O (10 mol%) in acetone (1.0 mL). The resulting mixture was sealed and stirred for 8 h at room temperature. Upon completion, CH<sub>2</sub>Cl<sub>2</sub> (10 mL) was added to the reaction system, and the resulting mixture was filtered through a pad of celite. The filtrate was extracted with H<sub>2</sub>O (20 mL), and the aqueous layer was extracted with CH<sub>2</sub>Cl<sub>2</sub> (2 × 10 mL). The collected organic layer was dried with anhydrous Na<sub>2</sub>SO<sub>4</sub>, filtered and concentrated under vacuum. The residue was purified by column chromatography on silica gel (200–300 mesh) using hexane-EtOAc as eluent (3:1, V/V) to afford the pure product **3aa**.

### 3.3 The Functionalization of the product 3

Mixture of **3** (0.1 mmol, 1.0 equiv), Pd(OAc)<sub>2</sub> (15 mol %), CH<sub>3</sub>I or PhI (0.4mmol, 4.0 equiv), anhydrous KOAc (0.2 mmol, 2.0 equiv), and 1,4-dioxane or xylene (1 mL) was placed in a 25 mL Schlenk tube with a rubber plug under air. The tube was heated at 130 °C for 24 h or 12 h. The reaction mixture was cooled to room temperature, diluted with ethyl acetate, filtered through celite, and concentrated in vacuo. The residue was purified by silica gel column chromatography with petroleum ether-ethyl acetate (5:1, V/V) to afford the desired products.

### 4 Characterization Data of the Products

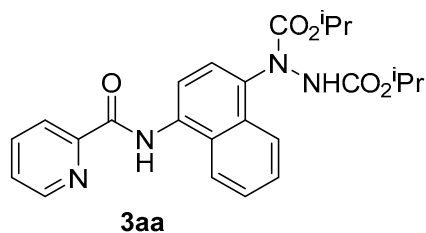

**Diisopropyl 1-(4-(picolinamido)naphthalen-1-yl)hydrazine-1,2-dicarboxylate (3aa<sup>[6d]</sup>):** pale yellow solid (44.0 mg, 97%),  $R_f$  = 0.32 (25% EtOAc in hexane), mp 176.9-178.0 °C; <sup>1</sup>H NMR (400 MHz, CDCl<sub>3</sub>)  $\delta$  10.82 (s, 1H), 8.71 (d,  $J$  = 7.93 Hz, 1H), 8.36 (d,  $J$  = 7.93 Hz, 1H), 8.36 (d,  $J$  = 7.81 Hz, 1H), 8.12-8.10 (m, 2H), 7.94 (td,  $J_1$  = 1.56 Hz,  $J_2$  = 7.68 Hz, 1H), 7.75 (s, 1H), 7.63-7.56 (m, 2H), 7.54-7.51 (m, 1H), 7.28 (s, 1H), 5.02-5.01 (m, 2H), 1.25-1.05 (m, 12H); <sup>13</sup>C NMR (100 MHz, CDCl<sub>3</sub>)  $\delta$  162.2, 156.1, 149.8, 148.1, 137.8, 134.9, 132.7, 130.7, 126.9, 126.8, 126.7, 126.5, 126.0, 123.7, 122.5, 120.8, 118.1, 70.9, 70.0, 22.0, 21.8; HRMS (ESI<sup>+</sup>)  $m/z$  [M + H]<sup>+</sup> calcd for C<sub>24</sub>H<sub>27</sub>N<sub>4</sub>O<sub>5</sub>: 451.1976, found: 451.1977.

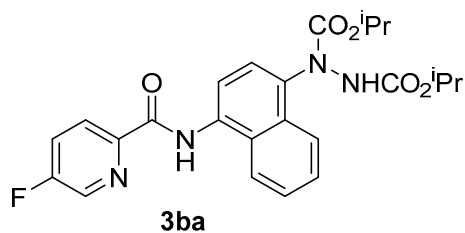

**Diisopropyl 1-(4-(5-fluoropicolinamido)naphthalen-1-yl)hydrazine-1,2-dicarboxylate (3ba):** yellow solid (43.6 mg, 93%),  $R_f$  = 0.32 (25% EtOAc in hexane), mp 156.5-158.0 °C; <sup>1</sup>H NMR (400 MHz, CDCl<sub>3</sub>)  $\delta$  10.55 (s, 1H), 8.53 (d,  $J$  = 2.70 Hz, 1H), 8.40-8.37 (m, 2H), 8.09-8.05 (m, 2H), 7.77-7.75 (m, 1H), 7.64-7.54 (m, 3H), 7.36 (s, 1H), 5.05-5.01 (m, 2H), 1.44-1.09 (m, 12H); <sup>13</sup>C NMR (100 MHz, CDCl<sub>3</sub>)  $\delta$  161.4 (d,  $J$  = 263.43 Hz), 161.2, 156.1, 146.2 (d,  $J$  = 3.79 Hz), 136.8 (d,  $J$  = 25.40 Hz), 135.1, 132.5, 130.7, 126.8 (d,  $J$  = 11.09 Hz), 126.5, 125.9, 124.5, 124.4, 124.3 (d,  $J$  = 18.66 Hz), 123.8, 120.7, 118.3, 70.9, 70.0, 22.0; <sup>19</sup>F NMR (376 MHz, CDCl<sub>3</sub>):  $\delta$  -121.18 (s,

1F); HRMS (ESI<sup>+</sup>) *m/z* [M + H]<sup>+</sup> calcd for C<sub>24</sub>H<sub>26</sub>FN<sub>4</sub>O<sub>5</sub>: 469.1882, found: 469.1881.

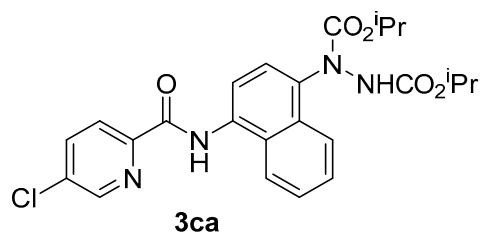

**Diisopropyl 1-(4-(5-chloropicolinamido)naphthalen-1-yl)hydrazine-1,2-dicarboxylate (3ca):** yellow solid (45.0 mg, 93%), *R<sub>f</sub>* = 0.32 (25% EtOAc in hexane), mp 170.9-172.6 °C; <sup>1</sup>H NMR (400 MHz, CDCl<sub>3</sub>) δ 10.57 (s, 1H), 8.64 (d, *J* = 2.07 Hz, 1H), 8.38 (d, *J* = 7.97 Hz, 1H), 8.30 (d, *J* = 8.36 Hz, 1H), 8.09-8.04 (m, 2H), 7.91 (dd, *J<sub>1</sub>* = 2.31 Hz, *J<sub>2</sub>* = 8.37 Hz, 1H), 7.76 (s, 1H), 7.62-7.56 (m, 2H), 7.32 (s, 1H), 5.02-5.01 (m, 2H), 1.43-1.09 (m, 12 H); <sup>13</sup>C NMR (100 MHz, CDCl<sub>3</sub>) δ 161.4, 156.1, 148.0, 147.2, 137.5, 135.5, 135.2, 132.4, 130.7, 126.9, 126.8, 126.2, 125.9, 123.8, 123.6, 120.6, 118.3, 70.9, 70.0, 22.0; HRMS (ESI<sup>+</sup>) *m/z* [M + H]<sup>+</sup> calcd for C<sub>24</sub>H<sub>26</sub>ClN<sub>4</sub>O<sub>5</sub>: 485.1586, found: 485.1584.

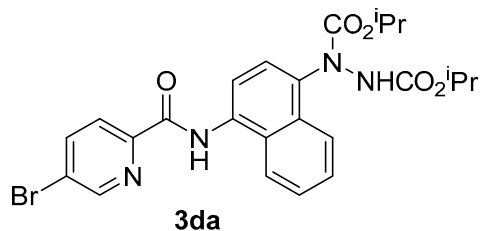

**Diisopropyl 1-(4-(5-bromopicolinamido)naphthalen-1-yl)hydrazine-1,2-dicarboxylate (3da):** yellow solid (50.1 mg, 95%), *R<sub>f</sub>* = 0.32 (25% EtOAc in hexane), mp 139.5-140.5 °C; <sup>1</sup>H NMR (400 MHz, CDCl<sub>3</sub>) δ 10.58 (s, 1H), 8.76 (d, *J* = 1.96 Hz, 1H), 8.38 (d, *J* = 7.95 Hz, 1H), 8.24 (d, *J* = 8.30 Hz, 1H), 8.08-8.04 (m, 3H), 7.75 (s, 1H), 7.62-7.56 (m, 2H), 7.29 (s, 1H), 5.02-5.01 (m, 2H), 1.25-1.09 (m, 2H); <sup>13</sup>C NMR (100 MHz, CDCl<sub>3</sub>) δ 161.5, 156.1, 149.4, 148.3, 140.5, 135.2, 132.4, 130.7, 126.8, 126.8, 126.6, 125.9, 124.5, 124.0, 123.8, 120.6, 118.3, 70.9, 70.0, 22.0; HRMS (ESI<sup>+</sup>) *m/z* [M + H]<sup>+</sup> calcd for C<sub>24</sub>H<sub>26</sub>BrN<sub>4</sub>O<sub>5</sub>: 529.1081, found: 529.1077.

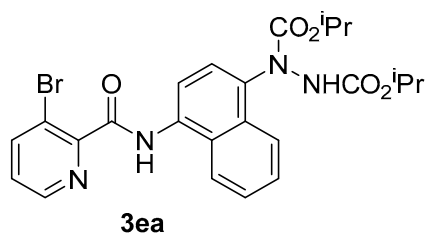

**Diisopropyl 1-(4-(3-bromopicolinamido)naphthalen-1-yl)hydrazine-1,2-dicarboxylate (3ea):** yellow solid (50.3 mg, 95%), *R<sub>f</sub>* = 0.32 (25% EtOAc in hexane),

mp 176.2-178.4 °C;  $^1\text{H}$  NMR (400 MHz,  $\text{CDCl}_3$ )  $\delta$  10.74 (s, 1H), 8.64 (dd,  $J_1 = 1.00$  Hz,  $J_2 = 4.40$  Hz, 1H), 8.40 (d,  $J = 7.20$  Hz, 1H), 8.12-8.02 (m, 3H), 7.73 (s, 1H), 7.61-7.59 (m, 2H), 7.35 (dd,  $J_1 = 4.53$  Hz,  $J_2 = 8.08$  Hz, 1H), 7.23 (s, 1H), 5.02-5.00 (m, 2H), 1.25-1.09 (m, 12 H);  $^{13}\text{C}$  NMR (100 MHz,  $\text{CDCl}_3$ )  $\delta$  161.2, 156.0, 146.6, 146.3, 144.5, 135.0, 132.7, 130.7, 126.9, 126.7, 126.5, 125.9, 123.7, 120.7, 120.0, 118.3, 70.9, 70.0, 22.0; HRMS ( $\text{ESI}^+$ )  $m/z$   $[\text{M} + \text{H}]^+$  calcd for  $\text{C}_{24}\text{H}_{26}\text{BrN}_4\text{O}_5$ : 529.1081, found: 529.1077.

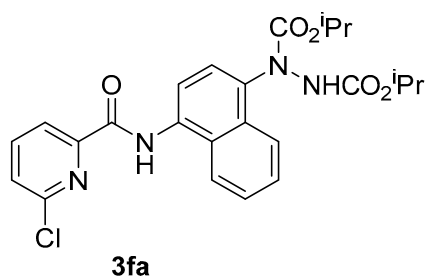

**Diisopropyl 1-(4-(6-chloropicolinamido)naphthalen-1-yl)hydrazine-1,2-dicarboxylate (3fa):** yellow solid (40.2 mg, 83%),  $R_f = 0.32$  (25% EtOAc in hexane), mp 218.0-219.5 °C;  $^1\text{H}$  NMR (400 MHz,  $\text{CDCl}_3$ )  $\delta$  10.40 (s, 1H), 8.33 (d,  $J = 7.70$  Hz, 1H), 8.28 (d,  $J = 7.48$  Hz, 1H), 8.06 (d,  $J = 8.52$  Hz, 1H), 7.91 (t,  $J = 7.76$  Hz, 1H), 7.76 (s, 1H), 7.65-7.55 (m, 3H), 7.24 (s, 1H), 5.02-4.99 (m, 2H), 1.26-1.10 (m, 12H);  $^{13}\text{C}$  NMR (100 MHz,  $\text{CDCl}_3$ )  $\delta$  160.9, 156.1, 150.3, 150.1, 140.4, 135.4, 132.3, 130.7, 127.5, 127.1, 126.8, 126.7, 125.8, 123.7, 121.3, 120.8, 118.8, 70.9, 70.0, 22.0; HRMS ( $\text{ESI}^+$ )  $m/z$   $[\text{M} + \text{H}]^+$  calcd for  $\text{C}_{24}\text{H}_{26}\text{ClN}_4\text{O}_5$ : 485.1586, found: 485.1582.

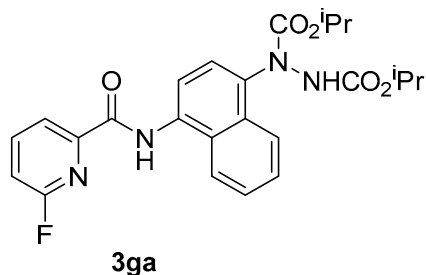

**Diisopropyl 1-(4-(6-fluoropicolinamido)naphthalen-1-yl)hydrazine-1,2-dicarboxylate (3ga):** yellow solid (44.7 mg, 95%),  $R_f = 0.32$  (25% EtOAc in hexane), mp 195.5-197.0 °C;  $^1\text{H}$  NMR (400 MHz,  $\text{CDCl}_3$ )  $\delta$  10.28 (s, 1H), 8.35 (d,  $J = 7.92$  Hz, 1H), 8.25 (dd,  $J_1 = 1.48$  Hz,  $J_2 = 7.36$  Hz, 1H), 8.07-8.01 (m, 3H), 7.75 (s, 1H), 7.64-7.57 (m, 2H), 7.32 (s, 1H), 7.19 (dd,  $J_1 = 1.96$  Hz,  $J_2 = 8.16$  Hz, 1H), 5.02-4.99 (m, 2H), 1.25-1.10 (m, 12H);  $^{13}\text{C}$  NMR (100 MHz,  $\text{CDCl}_3$ )  $\delta$  162.0 (d,  $J = 243.57$  Hz), 160.9, 156.1, 148.4 (d,  $J = 10.63$  Hz), 143.0 (d,  $J = 10.63$  Hz), 135.4, 132.2, 130.7, 127.0, 126.8, 126.7, 125.8, 123.8, 120.7, 120.3 (d,  $J = 3.66$  Hz), 118.7, 113.2 (d,  $J = 35.47$  Hz), 70.9, 70.0, 22.0;  $^{19}\text{F}$  NMR (376 MHz,  $\text{CDCl}_3$ ):  $\delta$  -66.95 (s, 1F); HRMS ( $\text{ESI}^+$ )  $m/z$   $[\text{M}$

+ H]<sup>+</sup> calcd for C<sub>24</sub>H<sub>26</sub>FN<sub>4</sub>O<sub>5</sub>: 469.1882, found: 469.1880.

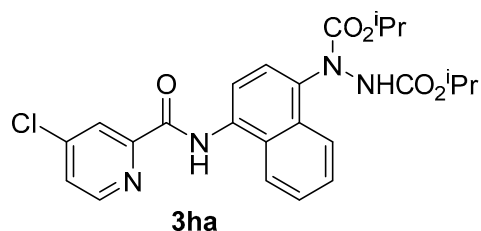

**Diisopropyl 1-(4-(4-chloropicolinamido)naphthalen-1-yl)hydrazine-1,2-dicarboxylate (3ha):** pale yellow solid (43.1 mg, 89%), *R*<sub>f</sub> = 0.32 (25% EtOAc in hexane), mp 170.6-172.4 °C; <sup>1</sup>H NMR (400 MHz, CDCl<sub>3</sub>) δ 10.67 (s, 1H), 8.59 (d, *J* = 5.24 Hz, 1H), 8.38 (d, *J* = 7.89 Hz, 1H), 8.35 (d, *J* = 1.80 Hz, 1H), 8.09-8.04 (m, 2H), 7.75 (s, 1H), 7.62-7.56 (m, 2H), 7.52 (dd, *J*<sub>1</sub> = 1.92 Hz, *J*<sub>2</sub> = 5.20 Hz, 1H), 7.35 (s, 1H), 5.02-5.01 (m, 2H), 1.25-1.10 (m, 12H); <sup>13</sup>C NMR (100 MHz, CDCl<sub>3</sub>) δ 161.0, 156.1, 151.3, 149.0, 146.4, 135.2, 132.3, 130.7, 126.8, 126.6, 125.9, 123.8, 123.2, 120.6, 118.3, 70.9, 70.0, 22.0, 21.9; HRMS (ESI<sup>+</sup>) *m/z* [M + H]<sup>+</sup> calcd for C<sub>24</sub>H<sub>26</sub>ClN<sub>4</sub>O<sub>5</sub>: 485.1586, found: 485.1583.

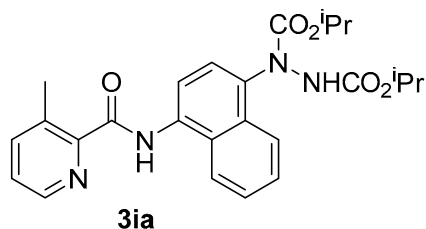

**Diisopropyl 1-(4-(3-methylpicolinamido)naphthalen-1-yl)hydrazine-1,2-dicarboxylate (3ia<sup>[6d]</sup>):** pale yellow solid (45.0 mg, 97%), *R*<sub>f</sub> = 0.32 (25% EtOAc in hexane), mp 192.1-194.0 °C; <sup>1</sup>H NMR (400 MHz, CDCl<sub>3</sub>) δ 11.05 (s, 1H), 8.54 (d, *J* = 3.81 Hz, 1H), 8.37 (d, *J* = 7.24 Hz, 1H), 8.11-8.08 (m, 2H), 7.73 (s, 1H), 7.67 (d, *J* = 7.64 Hz, 1H), 7.61-7.55 (m, 2H), 7.40 (q, *J* = 7.74 Hz, 1H), 7.23 (s, 1H), 5.02-5.00 (m, 2H), 2.85 (s, 3H), 1.25-1.09 (m, 12H); <sup>13</sup>C NMR (100 MHz, CDCl<sub>3</sub>) δ 163.7, 156.0, 146.7, 145.5, 141.4, 136.4, 134.6, 133.1, 130.7, 127.1, 126.6, 126.3, 126.2, 126.0, 123.6, 121.0, 118.0, 70.8, 69.9, 22.0, 20.8; HRMS (ESI<sup>+</sup>) *m/z* [M + K]<sup>+</sup> calcd for C<sub>25</sub>H<sub>28</sub>N<sub>4</sub>O<sub>5</sub>K: 503.1691, found: 503.1691.

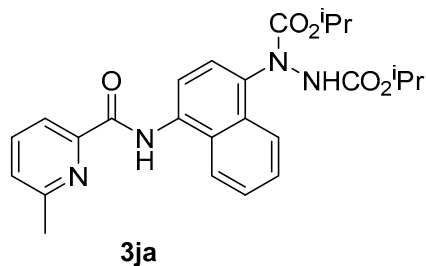

**Diisopropyl 1-(4-(6-methylpicolinamido)naphthalen-1-yl)hydrazine-1,2-**

**dicarboxylate (3ja):** yellow solid (32.6 mg, 70%),  $R_f = 0.32$  (25% EtOAc in hexane), mp 202.5-204.4 °C;  $^1\text{H}$  NMR (400 MHz,  $\text{CDCl}_3$ )  $\delta$  10.89 (s, 1H), 8.42 (d,  $J = 7.57$  Hz, 1H), 8.17-8.08 (m, 3H), 7.83-7.73 (m, 2H), 7.64-7.56 (m, 2H), 7.37 (d,  $J = 7.68$  Hz, 1H), 7.26 (s, 1H), 5.02-4.99 (m, 2H), 2.70 (s, 3H), 1.37-1.00 (m, 12H);  $^{13}\text{C}$  NMR (100 MHz,  $\text{CDCl}_3$ )  $\delta$  162.4, 157.2, 156.1, 149.1, 137.9, 134.8, 132.8, 130.8, 126.9, 126.7, 126.4, 126.4, 126.0, 123.7, 120.8, 119.6, 118.1, 70.8, 70.0, 24.4, 22.0; HRMS ( $\text{ESI}^+$ )  $m/z$   $[\text{M} + \text{K}]^+$  calcd for  $\text{C}_{25}\text{H}_{28}\text{N}_4\text{O}_5\text{K}$ : 503.1691, found: 503.1690.

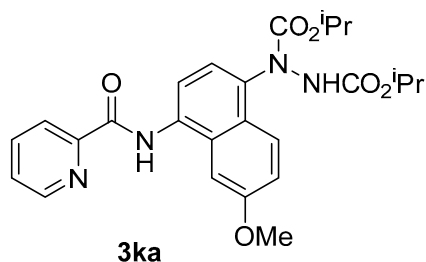

**Diisopropyl 1-(6-methoxy-4-(picolinamido)naphthalen-1-yl)hydrazine-1,2-dicarboxylate (3ka):** yellow solid (32.3 mg, 67%),  $R_f = 0.32$  (25% EtOAc in hexane), mp 191.0-192.5 °C;  $^1\text{H}$  NMR (400 MHz,  $\text{CDCl}_3$ )  $\delta$  10.57 (s, 1H), 8.68 (d,  $J = 4.20$  Hz, 1H), 8.36 (d,  $J = 7.80$  Hz, 1H), 8.28 (d,  $J = 8.00$  Hz, 1H), 8.05 (s, 1H), 7.94 (dt,  $J_1 = 1.55$  Hz,  $J_2 = 9.26$  Hz, 1H), 7.57-7.51 (m, 2H), 7.33 (d,  $J = 2.88$  Hz, 1H), 7.26-7.23 (m, 2H), 5.02-4.99 (m, 2H), 3.96 (s, 3H), 1.29-1.09 (m, 12H);  $^{13}\text{C}$  NMR (100 MHz,  $\text{CDCl}_3$ )  $\delta$  162.3, 158.2, 156.0, 149.9, 148.2, 137.8, 135.3, 131.5, 128.6, 126.6, 126.2, 125.7, 123.2, 122.6, 119.6, 118.6, 100.4, 70.8, 69.9, 55.3, 22.0, 21.8; HRMS ( $\text{ESI}^+$ )  $m/z$   $[\text{M} + \text{H}]^+$  calcd for  $\text{C}_{25}\text{H}_{29}\text{N}_4\text{O}_6$ : 481.2082, found: 481.2081.

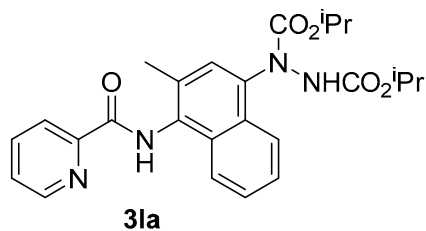

**Diisopropyl 1-(3-methyl-4-(picolinamido)naphthalen-1-yl)hydrazine-1,2-dicarboxylate (3la):** yellow solid (37.5 mg, 80%),  $R_f = 0.32$  (25% EtOAc in hexane), mp 175.9-177.6 °C;  $^1\text{H}$  NMR (400 MHz,  $\text{CDCl}_3$ )  $\delta$  9.90 (s, 1H), 8.70 (d,  $J = 4.20$  Hz, 1H), 8.33 (d,  $J = 7.80$  Hz, 1H), 7.97-7.92 (m, 3H), 7.68 (s, 1H), 7.55-7.52 (m, 1H), 7.49-7.46 (m, 2H), 7.20 (s, 1H), 5.02-4.99 (m, 2H), 2.46 (s, 3H), 1.37-1.12 (m, 12H);  $^{13}\text{C}$  NMR (100 MHz,  $\text{CDCl}_3$ )  $\delta$  162.9, 155.9, 149.6, 148.3, 137.6, 137.2, 133.2, 131.3, 130.3, 129.3, 128.6, 126.7, 126.6, 126.0, 123.0, 122.7, 70.9, 70.0, 22.0, 18.9; HRMS ( $\text{ESI}^+$ )  $m/z$   $[\text{M} + \text{K}]^+$  calcd for  $\text{C}_{25}\text{H}_{28}\text{N}_4\text{O}_5\text{K}$ : 503.1691, found: 503.1690.



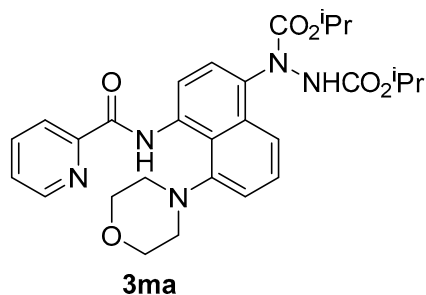

**Diisopropyl 1-(5-morpholino-4-(picolinamido)naphthalen-1-yl)hydrazine-1,2-dicarboxylate (3ma):** yellow solid (47.5 mg, 88%),  $R_f = 0.32$  (25% EtOAc in hexane), mp 113.6-115.0 °C;  $^1\text{H}$  NMR (400 MHz,  $\text{CDCl}_3$ )  $\delta$  13.96 (s, 1H), 9.14 (d,  $J = 8.50$  Hz, 1H), 8.73 (d,  $J = 4.17$  Hz, 1H), 8.38 (d,  $J = 7.84$  Hz, 1H), 7.95-7.72 (m, 3H), 7.54-7.47 (m, 2H), 7.41 (d,  $J = 7.33$  Hz, 1H), 7.20 (s, 1H), 5.02-4.99 (m, 2H), 4.25 (s, 2H), 3.84 (s, 2H), 3.19-2.98 (m, 4H), 1.25-1.03 (m, 12H);  $^{13}\text{C}$  NMR (100 MHz,  $\text{CDCl}_3$ )  $\delta$  163.4, 156.0, 151.0, 149.5, 147.9, 137.6, 135.9, 134.0, 133.0, 126.5, 126.4, 123.5, 120.4, 120.3, 117.3, 116.5, 70.8, 70.0, 65.5, 55.1, 54.3, 53.8, 22.0; HRMS ( $\text{ESI}^+$ )  $m/z$   $[\text{M} + \text{K}]^+$  calcd for  $\text{C}_{28}\text{H}_{33}\text{N}_5\text{O}_6\text{K}$ : 574.2062, found: 574.2059.

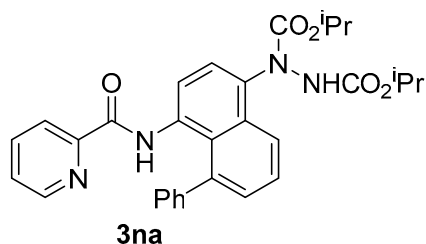

**Diisopropyl 1-(5-phenyl-4-(picolinamido)naphthalen-1-yl)hydrazine-1,2-dicarboxylate (3na<sup>[6d]</sup>):** yellow solid (26.7 mg, 50%),  $R_f = 0.32$  (25% EtOAc in hexane), mp 221.6-223.5 °C;  $^1\text{H}$  NMR (400 MHz,  $\text{CDCl}_3$ )  $\delta$  9.65 (s, 1H), 8.30 (d,  $J = 7.88$  Hz, 1H), 8.16-8.07 (m, 3H), 7.80-7.73 (m, 2H), 7.56-7.52 (m, 1H), 7.42-7.28 (m, 5H), 7.19 (s, 2H), 7.01 (t,  $J = 7.43$  Hz, 1H), 5.04-5.02 (m, 2H), 1.34-1.08 (m, 12H);  $^{13}\text{C}$  NMR (100 MHz,  $\text{CDCl}_3$ )  $\delta$  161.9, 155.9, 149.5, 147.3, 142.4, 138.1, 137.0, 135.7, 433.4, 132.1, 130.9, 129.2, 128.1, 126.9, 125.8, 125.7, 125.4, 123.1, 121.8, 70.9, 70.0, 29.7, 22.0; HRMS ( $\text{ESI}^+$ )  $m/z$   $[\text{M} + \text{K}]^+$  calcd for  $\text{C}_{30}\text{H}_{30}\text{N}_4\text{O}_5\text{K}$ : 565.1848, found: 565.1847.

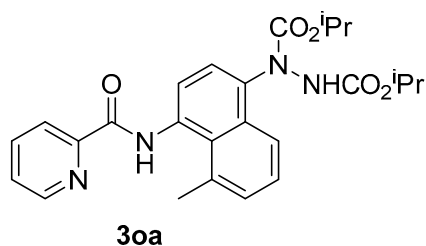

**Diisopropyl 1-(5-methyl-4-(picolinamido)naphthalen-1-yl)hydrazine-1,2-dicarboxylate (30a<sup>[6d]</sup>):** yellow solid (41.0 mg, 80%),  $R_f = 0.32$  (25% EtOAc in hexane), mp 181.1-183.9 °C;  $^1\text{H}$  NMR (400 MHz,  $\text{CDCl}_3$ )  $\delta$  10.67 (s, 1H), 8.65-8.64 (m, 1H), 8.36 (d,  $J = 7.81$  Hz, 1H), 8.12 (d,  $J = 7.33$  Hz, 1H), 7.94-7.90 (m, 2H), 7.75 (s, 1H), 7.51-7.48 (m, 1H), 7.39 (t,  $J = 7.10$  Hz, 1H), 7.30 (d,  $J = 6.88$  Hz, 1H), 5.01-4.99 (m, 2H), 2.99 (s, 3H), 1.25-1.03 (m, 12H);  $^{13}\text{C}$  NMR (100 MHz,  $\text{CDCl}_3$ )  $\delta$  162.2, 156.0, 149.9, 148.2, 137.7, 136.4, 133.7, 133.1, 132.4, 130.5, 128.6, 126.5, 126.3, 125.6, 122.7, 121.9, 70.8, 69.9, 25.1, 22.0; HRMS ( $\text{ESI}^+$ )  $m/z$   $[\text{M} + \text{K}]^+$  calcd for  $\text{C}_{25}\text{H}_{28}\text{N}_4\text{O}_5\text{K}$ : 503.1691, found: 503.1688.

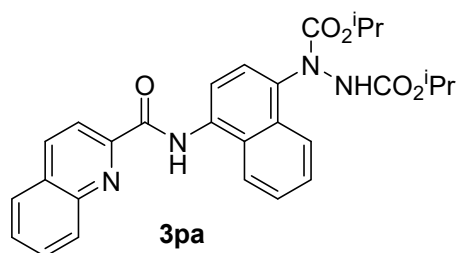

**Diisopropyl 1-(4-(quinoline-2-carboxamido)naphthalen-1-yl)hydrazine-1,2-dicarboxylate (3pa<sup>[6d]</sup>):** yellow solid (34.1 mg, 68%),  $R_f = 0.32$  (25% EtOAc in hexane), mp 185.4-187.0 °C;  $^1\text{H}$  NMR (400 MHz,  $\text{CDCl}_3$ )  $\delta$  11.02 (s, 1H), 8.47-8.37 (m, 3H), 8.26 (d,  $J = 8.47$  Hz, 1H), 8.19 (d,  $J = 8.33$  Hz, 1H), 8.11 (s, 1H), 7.92 (d,  $J = 8.14$  Hz, 1H), 7.85-7.79 (m, 2H), 7.68-7.59 (m, 3H), 7.29 (s, 1H), 5.04-5.02 (m, 2H), 1.27-1.11 (m, 12H);  $^{13}\text{C}$  NMR (100 MHz,  $\text{CDCl}_3$ )  $\delta$  162.4, 156.1, 149.6, 146.3, 138.0, 135.0, 132.8, 130.8, 130.4, 129.8, 129.5, 128.3, 127.8, 127.0, 126.7, 126.5, 126.0, 123.8, 120.8, 118.8, 118.2, 70.9, 70.0, 22.0; HRMS ( $\text{ESI}^+$ )  $m/z$   $[\text{M} + \text{K}]^+$  calcd for  $\text{C}_{28}\text{H}_{28}\text{N}_4\text{O}_5\text{K}$ : 539.1691, found: 539.1690.

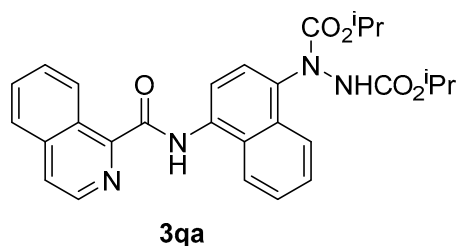

**Diisopropyl 1-(4-(isoquinoline-1-carboxamido)naphthalen-1-yl)hydrazine-1,2-dicarboxylate (3qa):** yellow solid (34.4 mg, 68%),  $R_f = 0.32$  (25% EtOAc in hexane), mp 223.1-224.2 °C;  $^1\text{H}$  NMR (400 MHz,  $\text{CDCl}_3$ )  $\delta$  11.16 (s, 1H), 9.78 (d,  $J = 7.92$  Hz, 1H), 8.62 (d,  $J = 4.30$  Hz, 1H), 8.44 (d,  $J = 7.26$  Hz, 1H), 8.16-8.07 (m, 2H), 7.90 (d,  $J = 6.08$  Hz, 2H), 7.77-7.71 (m, 3H), 7.63-7.57 (m, 2H), 7.20 (s, 1H), 5.02 (s, 1H), 1.26-

1.06 (m, 12H);  $^{13}\text{C}$  NMR (100 MHz,  $\text{CDCl}_3$ )  $\delta$  163.8, 156.1, 147.3, 140.0, 137.7, 134.9, 133.1, 130.8, 130.7, 129.0, 127.8, 127.4, 127.2, 126.9, 126.7, 126.4, 126.0, 125.1, 123.6, 121.0, 118.3, 70.9, 70.0, 22.0, 21.9; HRMS ( $\text{ESI}^+$ )  $m/z$   $[\text{M} + \text{K}]^+$  calcd for  $\text{C}_{28}\text{H}_{28}\text{N}_4\text{O}_5\text{K}$ : 539.1691, found: 539.1692.

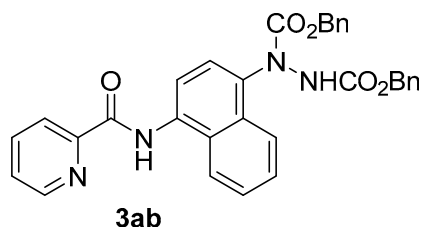

**Dibenzyl 1-(4-(picolinamido)naphthalen-1-yl)hydrazine-1,2-dicarboxylate (3ab<sup>[6d]</sup>):** pale yellow solid (29.8 mg, 73%),  $R_f$  = 0.32 (25% EtOAc in hexane), mp 81.2-83.9 °C;  $^1\text{H}$  NMR (400 MHz,  $\text{CDCl}_3$ )  $\delta$  10.81 (s, 1H), 8.69-8.68 (m, 1H), 8.40 (d,  $J$  = 7.94 Hz, 1H), 8.34 (d,  $J$  = 7.81 Hz, 1H), 8.10-8.08 (m, 2H), 7.90 (dt,  $J_1$  = 1.24 Hz,  $J_2$  = 7.68 Hz, 1H), 7.78 (s, 1H), 7.58 (t,  $J$  = 6.99 Hz, 2H), 7.52-7.49 (m, 2H), 7.29-7.20 (m, 2H), 7.05 (s, 1H), 5.15 (s, 4H);  $^{13}\text{C}$  NMR (100 MHz,  $\text{CDCl}_3$ )  $\delta$  162.3, 156.1, 149.7, 148.1, 137.8, 135.7, 135.4, 134.4, 133.0, 130.6, 128.5, 128.2, 128.0, 127.6, 127.0, 126.8, 126.7, 126.6, 126.1, 123.6, 120.8, 118.0, 68.4, 67.8; HRMS ( $\text{ESI}^+$ )  $m/z$   $[\text{M} + \text{H}]^+$  calcd for  $\text{C}_{32}\text{H}_{27}\text{N}_4\text{O}_5$ : 547.1976, found: 547.1973.

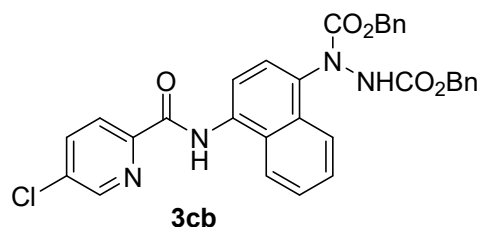

**Dibenzyl 1-(4-(5-chloropicolinamido)naphthalen-1-yl)hydrazine-1,2-dicarboxylate (3cb):** yellow solid (48.4 mg, 83%),  $R_f$  = 0.32 (25% EtOAc in hexane), mp 68.9-70.2 °C;  $^1\text{H}$  NMR (400 MHz,  $\text{CDCl}_3$ )  $\delta$  10.55 (s, 1H), 8.61 (d,  $J$  = 2.12 Hz, 1H), 8.33 (d,  $J$  = 7.89 Hz, 1H), 8.26 (d,  $J$  = 8.33 Hz, 1H), 8.09-8.01 (m, 2H), 7.81-7.79 (m, 3H), 7.59-7.50 (m, 2H), 7.30-7.91 (m, 9H), 7.04 (s, 1H), 5.14 (s, 4H);  $^{13}\text{C}$  NMR (100 MHz,  $\text{CDCl}_3$ )  $\delta$  161.5, 156.2, 147.8, 147.2, 137.5, 135.7, 135.6, 135.5, 134.7, 132.7, 130.7, 128.5, 128.3, 128.2, 127.6, 127.0, 126.8, 126.7, 126.0, 123.8, 123.6, 120.7, 118.3, 68.4, 67.8; HRMS ( $\text{ESI}^+$ )  $m/z$   $[\text{M} + \text{H}]^+$  calcd for  $\text{C}_{32}\text{H}_{26}\text{ClN}_4\text{O}_5$ : 581.1586, found: 581.1584.

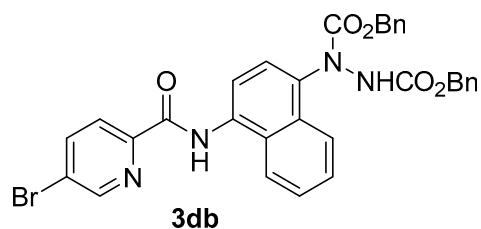

**Dibenzyl 1-(4-(5-bromopicolinamido)naphthalen-1-yl)hydrazine-1,2-dicarboxylate (3db):** pale yellow solid (58.6 mg, 94%),  $R_f = 0.32$  (25% EtOAc in hexane), mp 69.4-71.6 °C;  $^1\text{H}$  NMR (400 MHz,  $\text{CDCl}_3$ )  $\delta$  10.55 (s, 1H), 8.71 (d,  $J = 1.92$  Hz, 1H), 8.32 (d,  $J = 7.93$  Hz, 1H), 8.19-8.10 (m, 2H), 8.01 (d,  $J = 8.61$  Hz, 1H), 7.94 (d,  $J = 7.72$  Hz, 1H), 7.83-7.75 (m, 2H), 7.58-7.49 (m, 2H), 7.26-7.18 (m, 9H), 7.03 (s, 1H), 5.13 (s, 4H);  $^{13}\text{C}$  NMR (100 MHz,  $\text{CDCl}_3$ )  $\delta$  161.6, 156.2, 149.4, 148.2, 140.5, 135.7, 135.5, 134.8, 132.6, 130.7, 128.5, 128.3, 128.2, 128.1, 127.6, 127.0, 126.8, 126.7, 126.0, 124.6, 124.0, 123.8, 120.6, 118.3, 68.4, 67.8; HRMS ( $\text{ESI}^+$ )  $m/z$   $[\text{M} + \text{H}]^+$  calcd for  $\text{C}_{32}\text{H}_{26}\text{BrN}_4\text{O}_5$ : 625.1081, found: 625.1080.

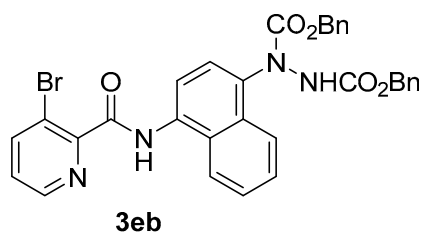

**Dibenzyl 1-(4-(3-bromopicolinamido)naphthalen-1-yl)hydrazine-1,2-dicarboxylate (3eb):** white solid (41.8 mg, 67%),  $R_f = 0.32$  (25% EtOAc in hexane), mp 74.1-75.3 °C;  $^1\text{H}$  NMR (400 MHz,  $\text{CDCl}_3$ )  $\delta$  10.74 (s, 1H), 8.63 (d,  $J = 4.05$  Hz, 1H), 8.38 (d,  $J = 7.87$  Hz, 1H), 8.10-8.01 (m, 3H), 7.76 (s, 1H), 7.58-7.50 (m, 3H), 7.34-7.72 (m, 10H), 7.05 (s, 1H), 5.15 (s, 4H);  $^{13}\text{C}$  NMR (100 MHz,  $\text{CDCl}_3$ )  $\delta$  161.1, 156.1, 146.5, 146.2, 144.5, 135.6, 135.4, 134.4, 132.9, 130.5, 128.5, 128.3, 128.1, 127.6, 126.9, 136.9, 126.6, 126.0, 123.5, 120.7, 120.0, 118.1, 68.4, 67.9; HRMS ( $\text{ESI}^+$ )  $m/z$   $[\text{M} + \text{H}]^+$  calcd for  $\text{C}_{32}\text{H}_{26}\text{BrN}_4\text{O}_5$ : 625.1081, found: 625.1080.

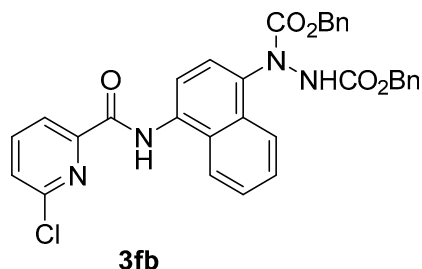

**Dibenzyl 1-(4-(6-chloropicolinamido)naphthalen-1-yl)hydrazine-1,2-dicarboxylate (3fb):** pale yellow solid (41.9 mg, 72%),  $R_f = 0.32$  (25% EtOAc in

hexane), mp 75.9-77.3 °C;  $^1\text{H}$  NMR (400 MHz,  $\text{CDCl}_3$ )  $\delta$  10.37 (s, 1H), 8.29-8.23 (m, 2H), 8.03 (d,  $J$  = 8.56 Hz, 2H), 7.84-7.70 (m, 3H), 7.60 (t,  $J$  = 7.05 Hz, 1H), 7.51 (d,  $J$  = 7.88 Hz, 2H), 7.28-7.20 (m, 9H), 7.04 (s, 1H), 5.14 (s, 4H);  $^{13}\text{C}$  NMR (100 MHz,  $\text{CDCl}_3$ )  $\delta$  161.0, 156.2, 150.2, 150.1, 140.4, 135.6, 135.4, 135.0, 132.5, 130.6, 128.5, 128.3, 128.2, 127.6, 127.5, 127.1, 126.8, 126.0, 123.7, 121.3, 120.8, 118.7, 68.4, 67.8; HRMS ( $\text{ESI}^+$ )  $m/z$   $[\text{M} + \text{H}]^+$  calcd for  $\text{C}_{32}\text{H}_{26}\text{ClN}_4\text{O}_5$ : 581.1586, found: 581.1585.

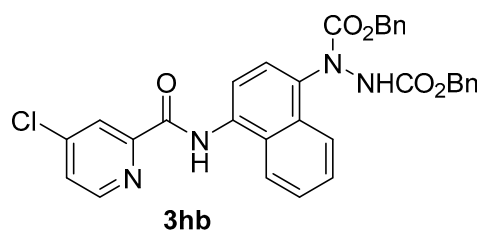

**Dibenzyl 1-(4-(4-chloropicolinamido)naphthalen-1-yl)hydrazine-1,2-dicarboxylate (3hb):** pale yellow solid (46.7 mg, 80%),  $R_f$  = 0.32 (25% EtOAc in hexane), mp 70.5-71.1 °C;  $^1\text{H}$  NMR (400 MHz,  $\text{CDCl}_3$ )  $\delta$  10.65 (s, 1H), 8.57 (d,  $J$  = 5.24 Hz, 1H), 8.36-8.33 (m, 2H), 8.03 (d,  $J$  = 8.66 Hz, 2H), 7.77 (s, 1H), 7.59-7.55 (m, 2H), 7.50 (dd,  $J_1$  = 1.96 Hz,  $J_2$  = 5.16 Hz, 2H), 7.30-7.20 (m, 9H), 7.04 (s, 1H), 5.14 (s, 4H);  $^{13}\text{C}$  NMR (100 MHz,  $\text{CDCl}_3$ )  $\delta$  161.1, 156.1, 151.2, 149.0, 146.4, 135.6, 135.4, 134.7, 132.7, 130.6, 128.5, 128.3, 128.2, 127.7, 127.0, 126.9, 126.7, 126.1, 123.6, 123.2, 120.7, 118.1, 68.5, 67.9; HRMS ( $\text{ESI}^+$ )  $m/z$   $[\text{M} + \text{H}]^+$  calcd for  $\text{C}_{32}\text{H}_{26}\text{ClN}_4\text{O}_5$ : 581.1586, found: 581.1586.

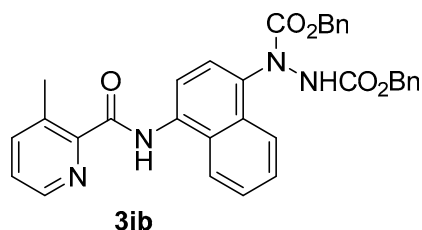

**Dibenzyl 1-(4-(3-methylpicolinamido)naphthalen-1-yl)hydrazine-1,2-dicarboxylate (3ib<sup>[6d]</sup>):** white solid (44.7 mg, 80%),  $R_f$  = 0.32 (25% EtOAc in hexane), mp 67.1-69.5 °C;  $^1\text{H}$  NMR (400 MHz,  $\text{CDCl}_3$ )  $\delta$  11.05 (s, 1H), 8.52 (d,  $J$  = 3.61 Hz, 1H), 8.35 (d,  $J$  = 7.92 Hz, 1H), 8.07 (d,  $J$  = 8.73 Hz, 2H), 7.75 (s, 1H), 7.65-7.49 (m, 4H), 7.38 (dd,  $J_1$  = 4.46 Hz,  $J_2$  = 7.72 Hz, 2H), 7.28-7.20 (m, 8H), 7.05 (s, 1H), 5.14 (s, 4H), 2.82 (s, 3H);  $^{13}\text{C}$  NMR (100 MHz,  $\text{CDCl}_3$ )  $\delta$  163.8, 156.1, 146.7, 145.5, 141.4, 136.4, 135.7, 135.5, 134.1, 133.5, 130.6, 128.5, 128.3, 128.2, 127.6, 127.1, 126.9, 126.5, 126.2, 123.5, 121.1, 117.8, 68.4, 67.8, 20.8; HRMS ( $\text{ESI}^+$ )  $m/z$   $[\text{M} + \text{K}]^+$  calcd for  $\text{C}_{33}\text{H}_{28}\text{N}_4\text{O}_5\text{K}$ : 599.1691, found: 599.1692.

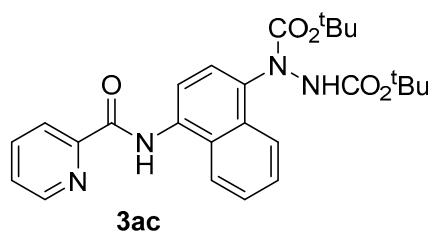

**Di-*tert*-butyl 1-(4-(picolinamido)naphthalen-1-yl)hydrazine-1,2-dicarboxylate (3ac<sup>[6d]</sup>):** pale yellow solid (45.8 mg, 95%),  $R_f = 0.32$  (25% EtOAc in hexane), mp 215.5-216.8 °C;  $^1\text{H}$  NMR (400 MHz,  $\text{CDCl}_3$ )  $\delta$  10.80 (s, 1H), 8.69 (d,  $J = 4.28$  Hz, 1H), 8.43 (d,  $J = 7.29$  Hz, 1H), 8.34 (d,  $J = 7.77$  Hz, 1H), 8.10-8.08 (m, 2H), 7.92 (t,  $J = 7.26$  Hz, 1H), 7.73 (s, 1H), 7.59-7.57 (m, 2H), 7.51 (t,  $J = 6.04$  Hz, 1H), 7.11 (s, 1H), 1.48-1.25 (m, 18H);  $^{13}\text{C}$  NMR (100 MHz,  $\text{CDCl}_3$ )  $\delta$  162.2, 155.5, 149.9, 148.1, 137.8, 135.6, 132.4, 130.7, 126.6, 126.3, 123.9, 122.5, 120.7, 118.0, 82.0, 81.3, 28.2, 28.0; HRMS ( $\text{ESI}^+$ )  $m/z$   $[\text{M} + \text{H}]^+$  calcd for  $\text{C}_{26}\text{H}_{31}\text{N}_4\text{O}_5$ : 479.2289, found: 479.2288.

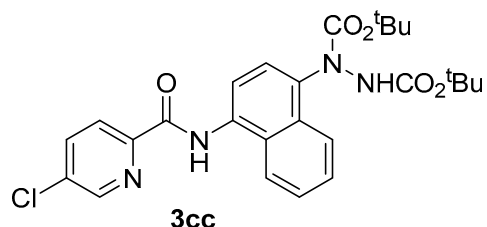

**Di-*tert*-butyl 1-(4-(5-chloropicolinamido)naphthalen-1-yl)hydrazine-1,2-dicarboxylate (3cc):** white solid (25.8 mg, 50%),  $R_f = 0.32$  (25% EtOAc in hexane), mp 170.1-172.2 °C;  $^1\text{H}$  NMR (400 MHz,  $\text{CDCl}_3$ )  $\delta$  10.56 (s, 1H), 8.65 (d,  $J = 2.12$  Hz, 1H), 8.38 (d,  $J = 7.54$  Hz, 1H), 8.31 (d,  $J = 8.32$  Hz, 1H), 8.06-8.04 (m, 2H), 7.92 (dd,  $J_1 = 2.17$  Hz,  $J_2 = 8.33$  Hz, 1H), 7.22 (s, 1H), 7.62-7.57 (m, 2H), 7.00 (s, 1H), 1.49-1.30 (m, 18H);  $^{13}\text{C}$  NMR (100 MHz,  $\text{CDCl}_3$ )  $\delta$  161.3, 155.4, 148.0, 147.2, 137.5, 135.7, 135.5, 132.0, 130.7, 126.7, 126.6, 126.4, 125.9, 125.5, 123.9, 123.6, 120.6, 118.2, 82.1, 81.4, 29.6, 28.2, 28.0; HRMS ( $\text{ESI}^+$ )  $m/z$   $[\text{M} + \text{H}]^+$  calcd for  $\text{C}_{26}\text{H}_{30}\text{ClN}_4\text{O}_5$ : 513.1899, found: 513.1901.

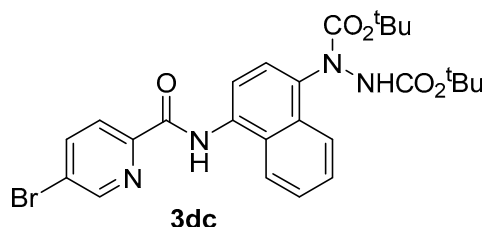

**Di-*tert*-butyl 1-(4-(5-bromopicolinamido)naphthalen-1-yl)hydrazine-1,2-dicarboxylate (3dc):** pale yellow solid (29.4 mg, 53%),  $R_f = 0.32$  (25% EtOAc in hexane), mp 182.7-184.9 °C;  $^1\text{H}$  NMR (400 MHz,  $\text{CDCl}_3$ )  $\delta$  10.57 (s, 1H), 8.77 (d,  $J =$

1.95 Hz, 1H), 8.38 (d,  $J = 7.58$  Hz, 1H), 8.24 (d,  $J = 8.41$  Hz, 1H), 8.09-8.04 (m, 3H), 7.73 (s, 1H), 7.62-7.57 (m, 2H), 6.99 (s, 1H), 1.55-1.30 (m, 18H);  $^{13}\text{C}$  NMR (100 MHz,  $\text{CDCl}_3$ )  $\delta$  161.5, 154.8, 149.4, 148.4, 140.5, 135.7, 132.0, 130.7, 126.7, 126.4, 125.4, 124.5, 123.9, 120.6, 118.2, 82.1, 81.4, 29.6, 28.2, 28.0; HRMS ( $\text{ESI}^+$ )  $m/z$   $[\text{M} + \text{H}]^+$  calcd for  $\text{C}_{26}\text{H}_{30}\text{BrN}_4\text{O}_5$ : 557.1394, found: 557.1395.

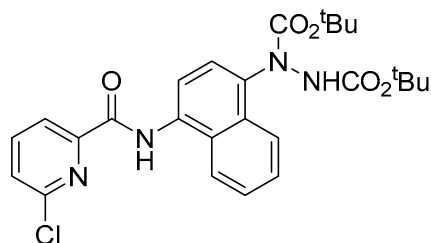

**3fc**

**Di-*tert*-butyl 1-(4-(6-chloropicolinamido)naphthalen-1-yl)hydrazine-1,2-dicarboxylate (3fc):** pale yellow solid (34.8 mg, 68%),  $R_f = 0.32$  (25% EtOAc in hexane), mp 207.8-209.6 °C;  $^1\text{H}$  NMR (400 MHz,  $\text{CDCl}_3$ )  $\delta$  10.39 (s, 1H), 8.33 (d,  $J = 7.78$  Hz, 1H), 8.27 (d,  $J = 7.35$  Hz, 1H), 8.05 (d,  $J = 8.80$  Hz, 2H), 7.90 (t,  $J = 7.79$  Hz, 1H), 7.73 (s, 1H), 7.64-7.57 (m, 2H), 7.55 (d,  $J = 7.78$  Hz, 1H), 7.05 (s, 1H), 1.48-1.25 (m, 18H);  $^{13}\text{C}$  NMR (100 MHz,  $\text{CDCl}_3$ )  $\delta$  160.9, 155.5, 154.7, 150.4, 150.1, 140.4, 136.0, 131.9, 130.7, 127.4, 127.0, 126.6, 125.3, 123.9, 121.2, 120.7, 118.8, 82.1, 82.5, 28.2, 28.0; HRMS ( $\text{ESI}^+$ )  $m/z$   $[\text{M} + \text{Na}]^+$  calcd for  $\text{C}_{26}\text{H}_{29}\text{ClN}_4\text{O}_5\text{Na}$ : 535.1719, found: 535.1724.

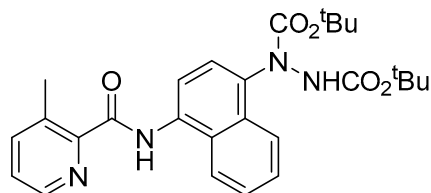

**3ic**

**Di-*tert*-butyl 1-(4-(3-methylpicolinamido)naphthalen-1-yl)hydrazine-1,2-dicarboxylate (3ic):** yellow solid (39.5 mg, 80%),  $R_f = 0.32$  (25% EtOAc in hexane), mp 197.0-198.1 °C;  $^1\text{H}$  NMR (400 MHz,  $\text{CDCl}_3$ )  $\delta$  11.04 (s, 1H), 8.54-8.53 (m, 1H), 8.37 (d,  $J = 7.09$  Hz, 1H), 8.10-8.07 (m, 2H), 7.70-7.65 (m, 2H), 7.59-7.55 (m, 2H), 7.40 (dd,  $J_1 = 4.58$  Hz,  $J_2 = 7.70$  Hz, 1H), 7.03 (s, 1H), 2.85 (s, 3H), 1.48-1.25 (m, 18H);  $^{13}\text{C}$  NMR (100 MHz,  $\text{CDCl}_3$ )  $\delta$  163.7, 155.4, 146.8, 145.5, 141.4, 136.3, 135.2, 132.8, 130.7, 127.0, 126.4, 126.2, 126.2, 123.7, 121.0, 118.0, 82.0, 81.3, 28.2, 28.0, 20.8; HRMS ( $\text{ESI}^+$ )  $m/z$   $[\text{M} + \text{H}]^+$  calcd for  $\text{C}_{27}\text{H}_{33}\text{N}_4\text{O}_5$ : 493.2445, found: 493.2446.

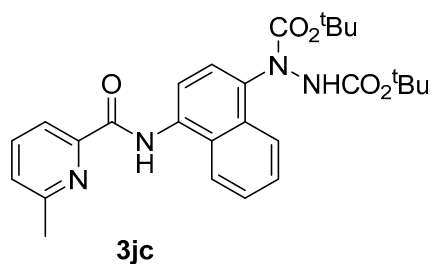

**Di-*tert*-butyl 1-(4-(6-methylpicolinamido)naphthalen-1-yl)hydrazine-1,2-dicarboxylate (3jc):** yellow solid (38.7 mg, 78%),  $R_f = 0.32$  (25% EtOAc in hexane), mp 201.3-203.8 °C;  $^1\text{H}$  NMR (400 MHz,  $\text{CDCl}_3$ )  $\delta$  10.83 (s, 1H), 8.41 (d,  $J = 7.48$  Hz, 1H), 8.15 (d,  $J = 7.62$  Hz, 1H), 8.09-8.07 (m, 2H), 7.81 (t,  $J = 7.68$  Hz, 1H), 7.73 (s, 1H), 7.37 (d,  $J = 7.65$  Hz, 1H), 7.06 (s, 1H), 2.70 (s, 3H), 1.48-1.30 (m, 18H);  $^{13}\text{C}$  NMR (100 MHz,  $\text{CDCl}_3$ )  $\delta$  162.4, 157.2, 155.4, 149.1, 137.9, 132.5, 130.8, 126.9, 126.4, 126.3, 123.9, 120.7, 119.6, 118.1, 82.0, 81.4, 28.2, 28.0, 24.4; HRMS ( $\text{ESI}^+$ )  $m/z$   $[\text{M} + \text{H}]^+$  calcd for  $\text{C}_{27}\text{H}_{32}\text{N}_4\text{O}_5$ : 493.2445, found: 493.2448.

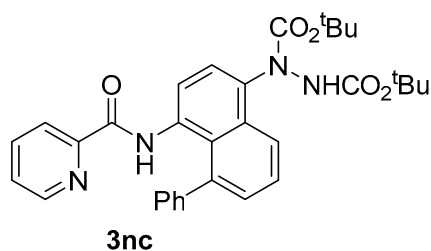

**Di-*tert*-butyl 1-(5-phenyl-4-(picolinamido)naphthalen-1-yl)hydrazine-1,2-dicarboxylate (3nc):** yellow solid (20.9 mg, 38%),  $R_f = 0.32$  (25% EtOAc in hexane), mp 201.5-203.3 °C;  $^1\text{H}$  NMR (400 MHz,  $\text{CDCl}_3$ )  $\delta$  9.62 (s, 1H), 8.29 (d,  $J = 6.17$  Hz, 1H), 8.16 (d,  $J = 3.91$  Hz, 1H), 8.07 (d,  $J = 7.73$  Hz, 2H), 7.77-7.73 (m, 2H), 7.54 (t,  $J = 7.21$  Hz, 1H), 3.39-3.26 (m, 4H), 7.19 (s, 1H), 7.02-6.98 (m, 2H), 1.56-1.34 (m, 18H);  $^{13}\text{C}$  NMR (100 MHz,  $\text{CDCl}_3$ )  $\delta$  161.9, 154.9, 149.6, 147.3, 142.4, 138.0, 137.0, 136.2, 133.0, 132.1, 130.8, 129.1, 128.1, 126.8, 125.7, 125.5, 123.2, 121.8, 82.1, 81.4, 29.6, 28.2, 28.1; HRMS ( $\text{ESI}^+$ )  $m/z$   $[\text{M} + \text{H}]^+$  calcd for  $\text{C}_{32}\text{H}_{35}\text{N}_4\text{O}_5$ : 555.2602, found: 555.2603.

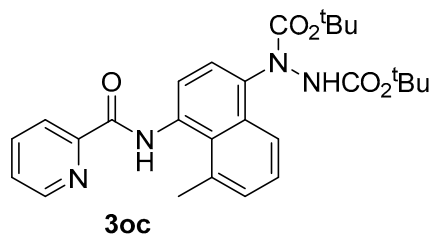

**Di-*tert*-butyl 1-(5-methyl-4-(picolinamido)naphthalen-1-yl)hydrazine-1,2-**



**dicarboxylate (3oc):** yellow solid (40.8 mg, 83%),  $R_f = 0.32$  (25% EtOAc in hexane), mp 202.5-204.7 °C;  $^1\text{H}$  NMR (400 MHz,  $\text{CDCl}_3$ )  $\delta$  10.65 (s, 1H), 8.65 (d,  $J = 4.43$  Hz, 1H), 8.35 (d,  $J = 7.82$  Hz, 1H), 7.94-7.88 (m, 2H), 7.33-7.32 (m, 1H), 7.51-7.48 (m, 1H), 7.39 (t,  $J = 7.15$  Hz, 1H), 7.29 (d,  $J = 6.91$  Hz, 1H), 7.03 (s, 1H), 2.99 (s, 3H), 1.47-1.43 (m, 18H);  $^{13}\text{C}$  NMR (100 MHz,  $\text{CDCl}_3$ )  $\delta$  162.2, 155.3, 154.9, 149.9, 148.1, 137.7, 137.0, 133.3, 133.0, 132.3, 130.3, 128.5, 126.5, 126.1, 125.2, 122.1, 82.0, 81.3, 28.2, 28.0, 25.1; HRMS ( $\text{ESI}^+$ )  $m/z$   $[\text{M} + \text{H}]^+$  calcd for  $\text{C}_{27}\text{H}_{33}\text{N}_4\text{O}_5$ : 493.2445, found: 493.2443.

## 5 References

[1] R. Shang, L. Ilies, E. Nakamura, *J. Am. Chem. Soc.* **2015**, *137*, 7660-7663.

## 6 The Experiment of Trapping the Intermediate Radical

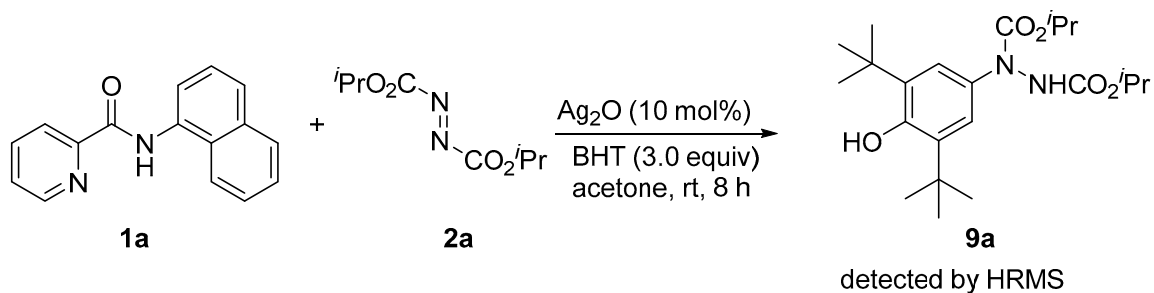

HRMS ( $\text{ESI}^+$ )  $m/z$   $[\text{M} + \text{Na}]^+$  calcd for  $\text{C}_{23}\text{H}_{38}\text{N}_2\text{O}_5$ : 445.2673, found: 445.2678.

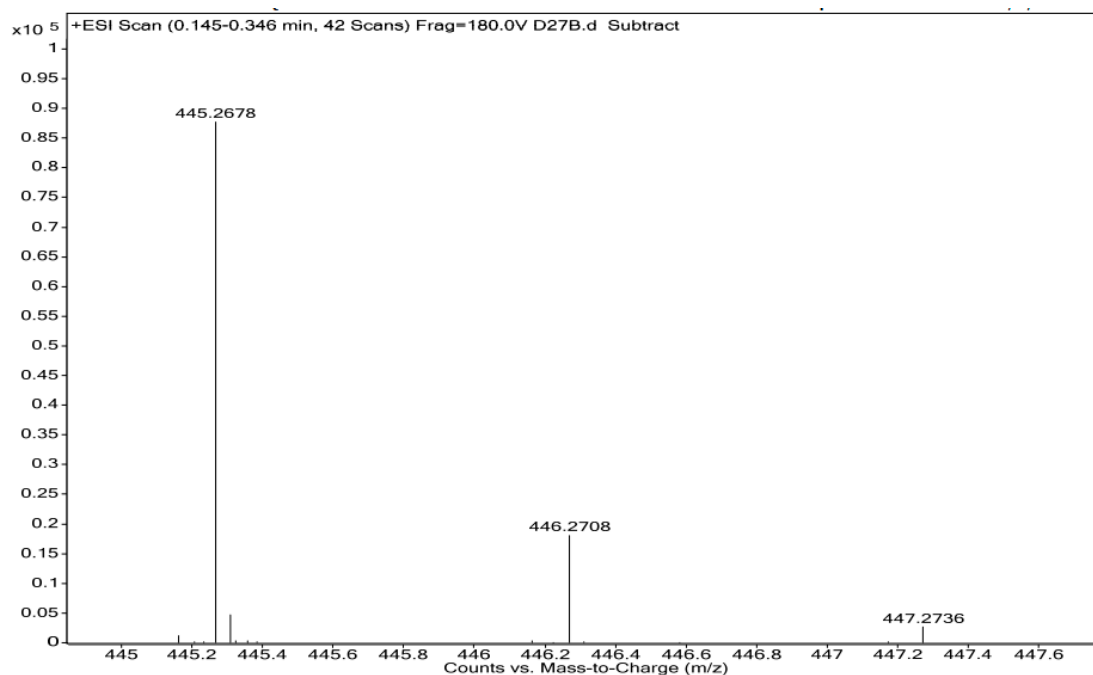

## 7. Copies of $^1\text{H}$ , $^{13}\text{C}$ NMR Spectra for the Products

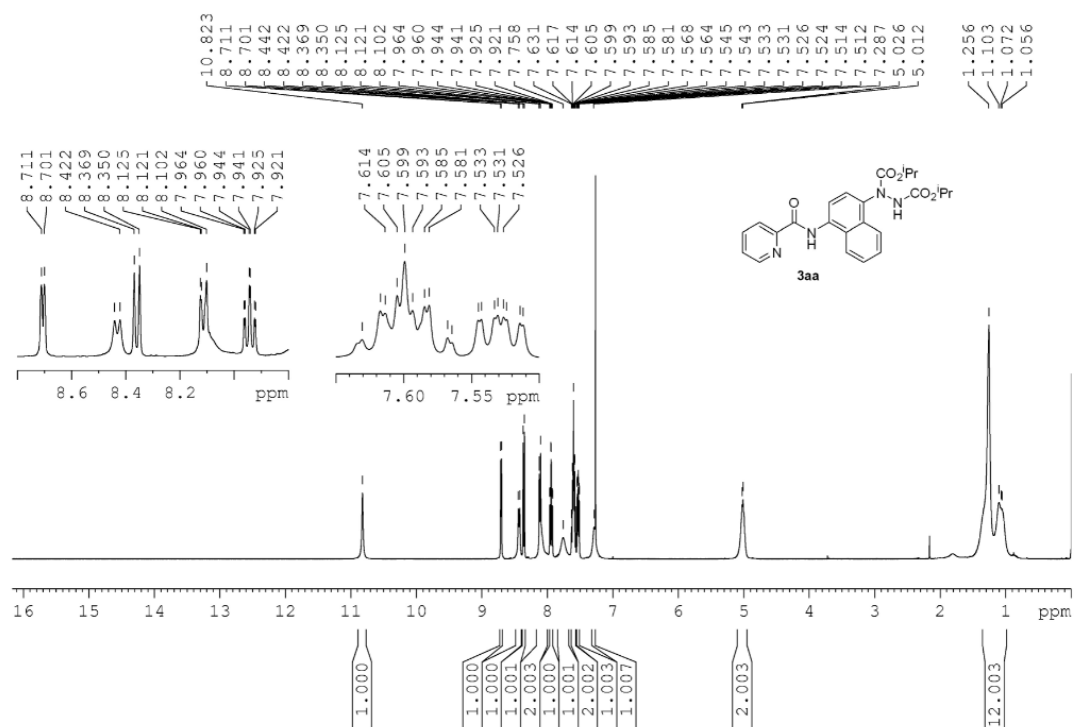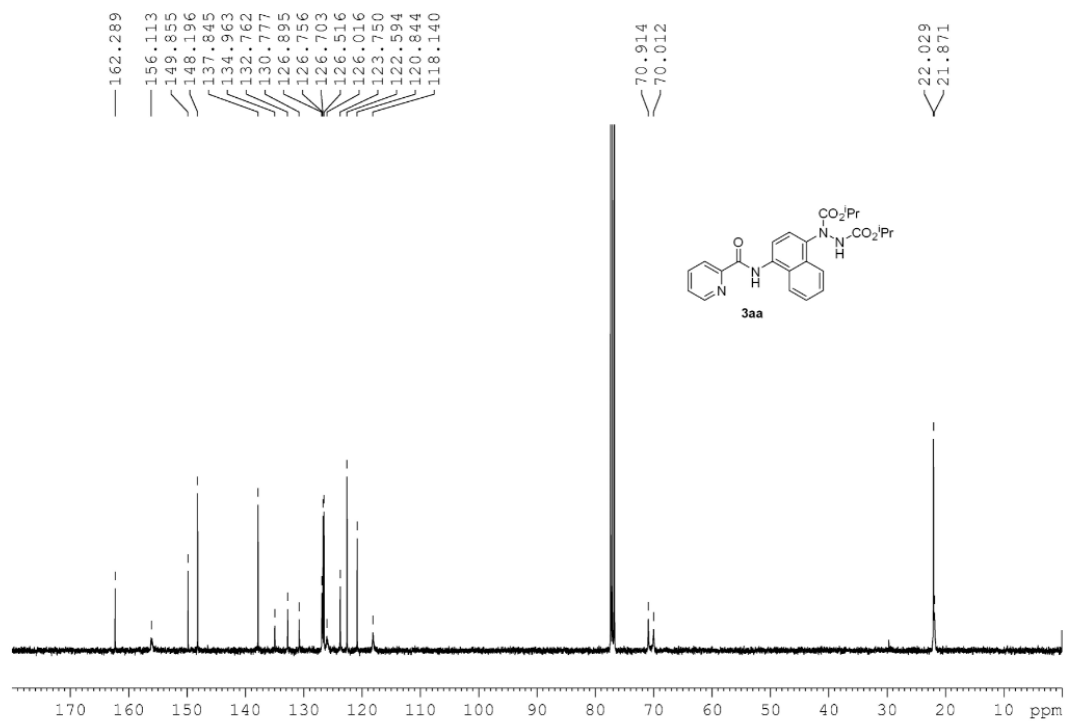

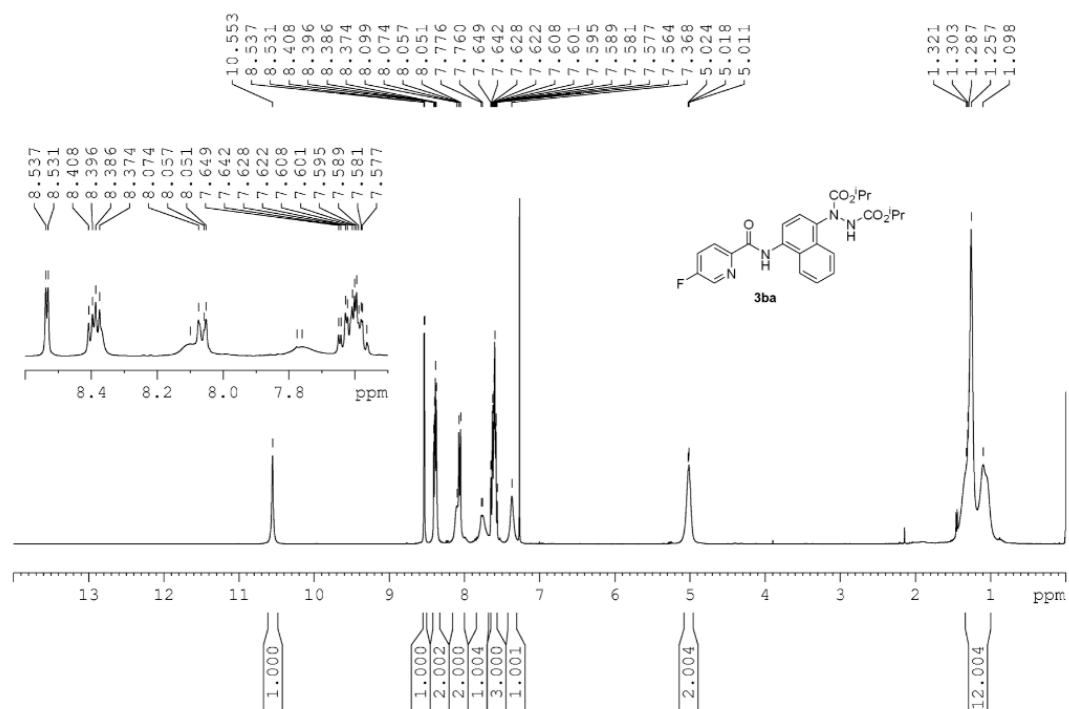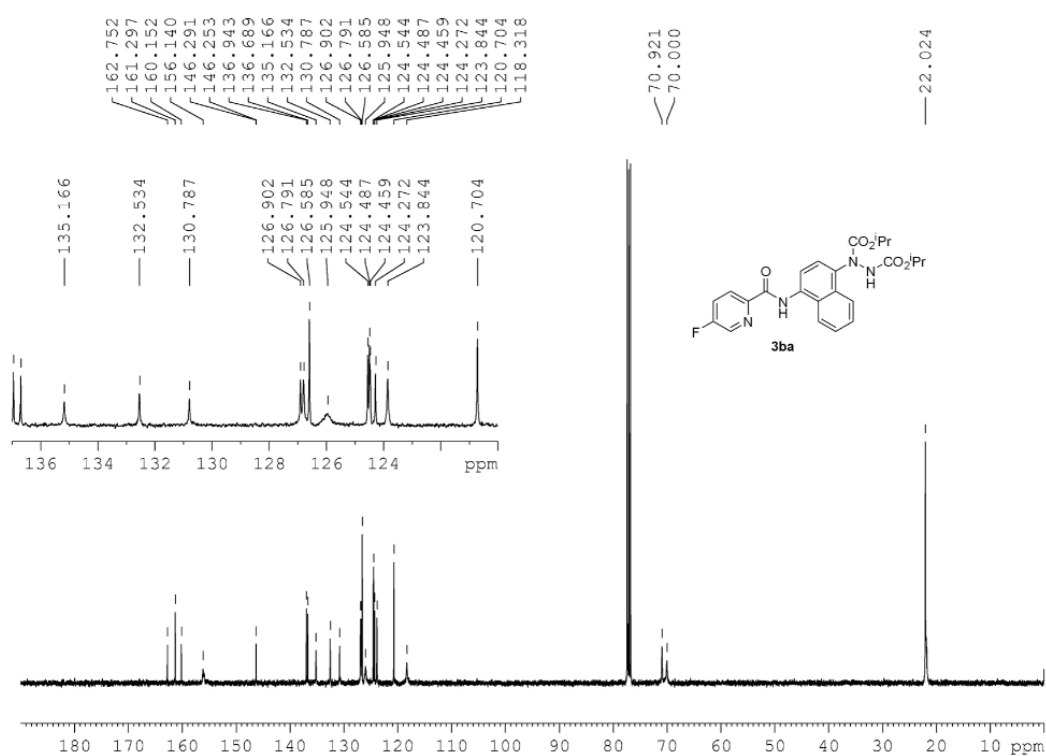

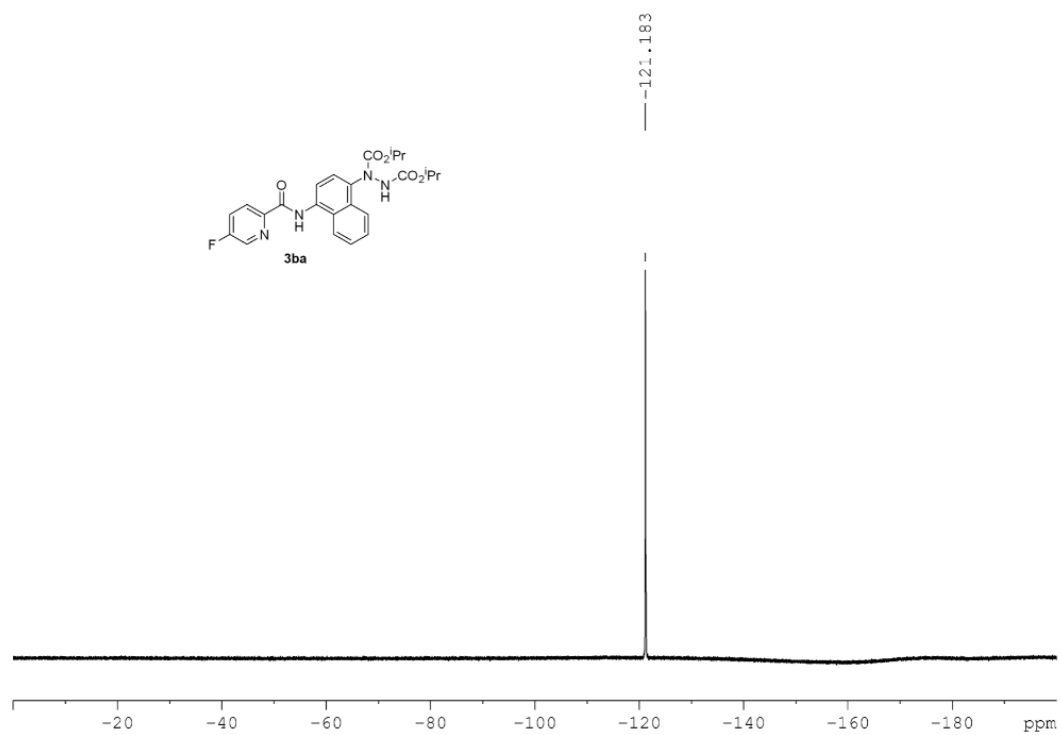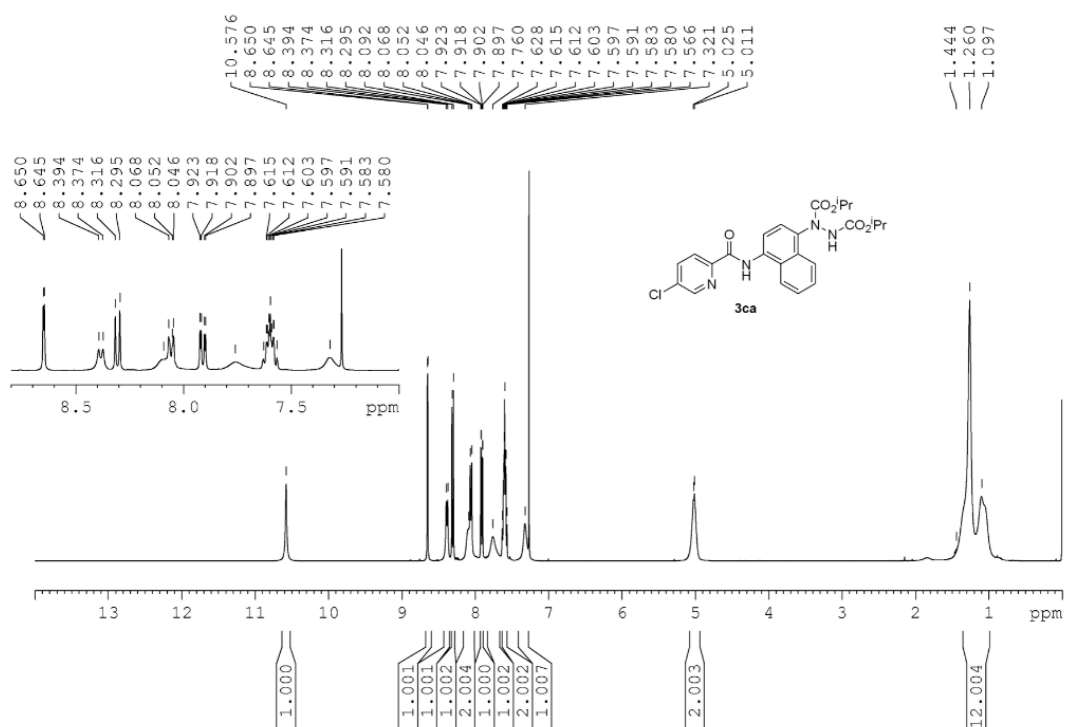

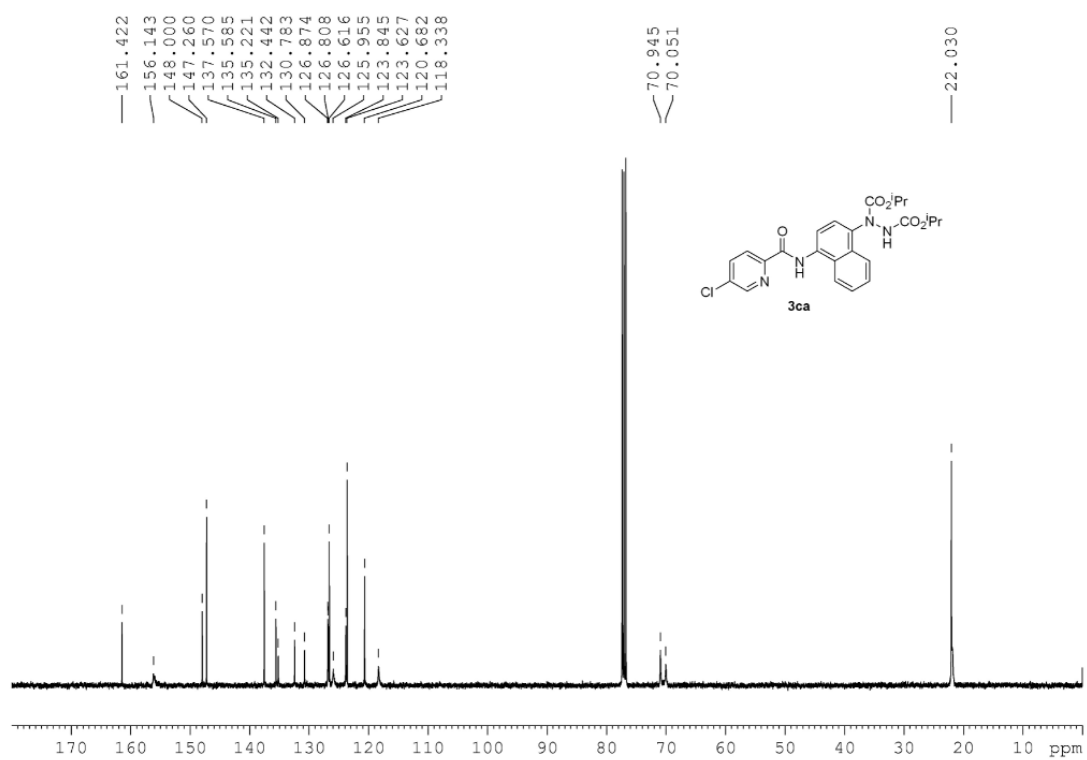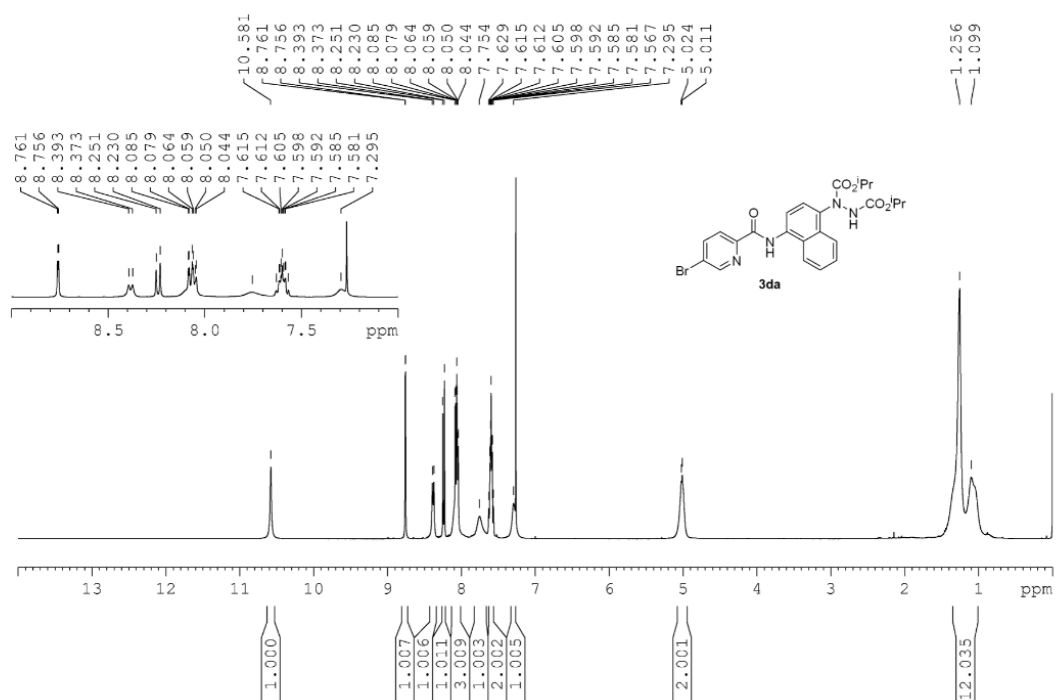

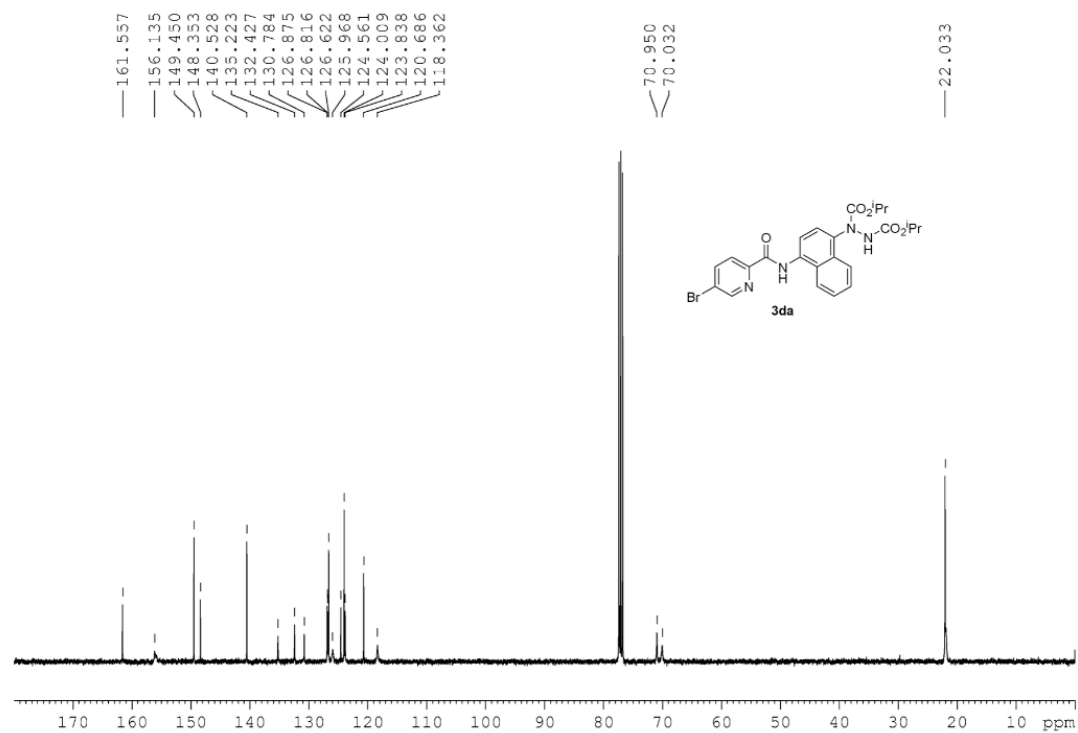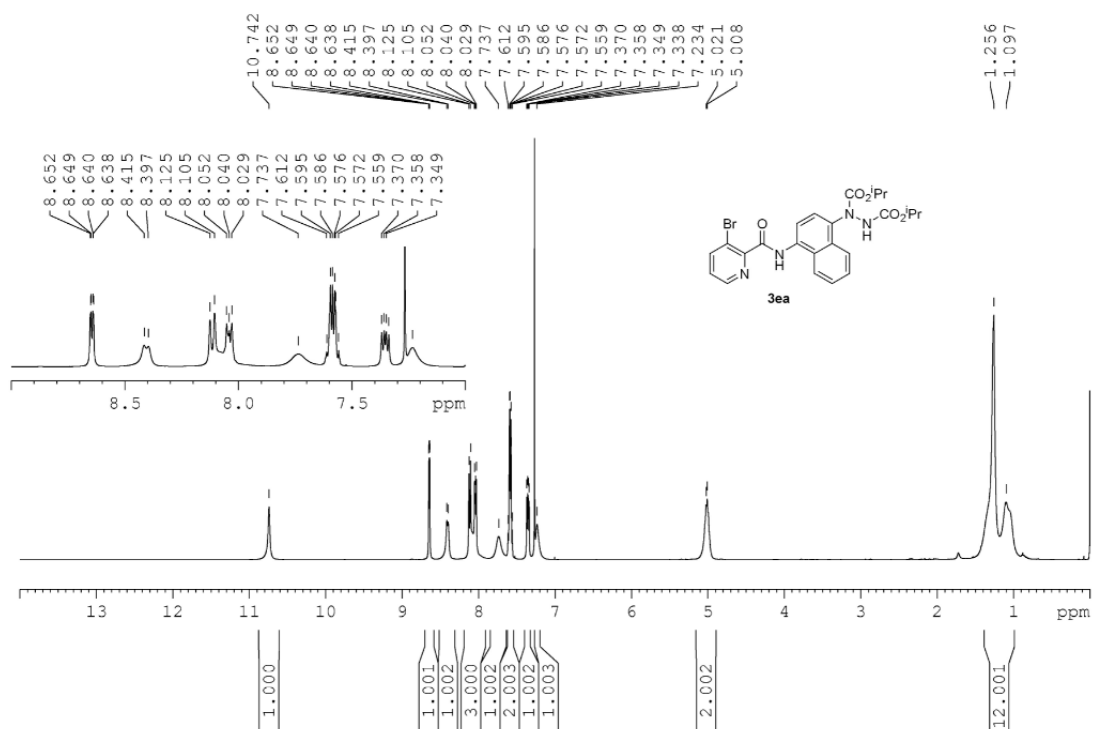

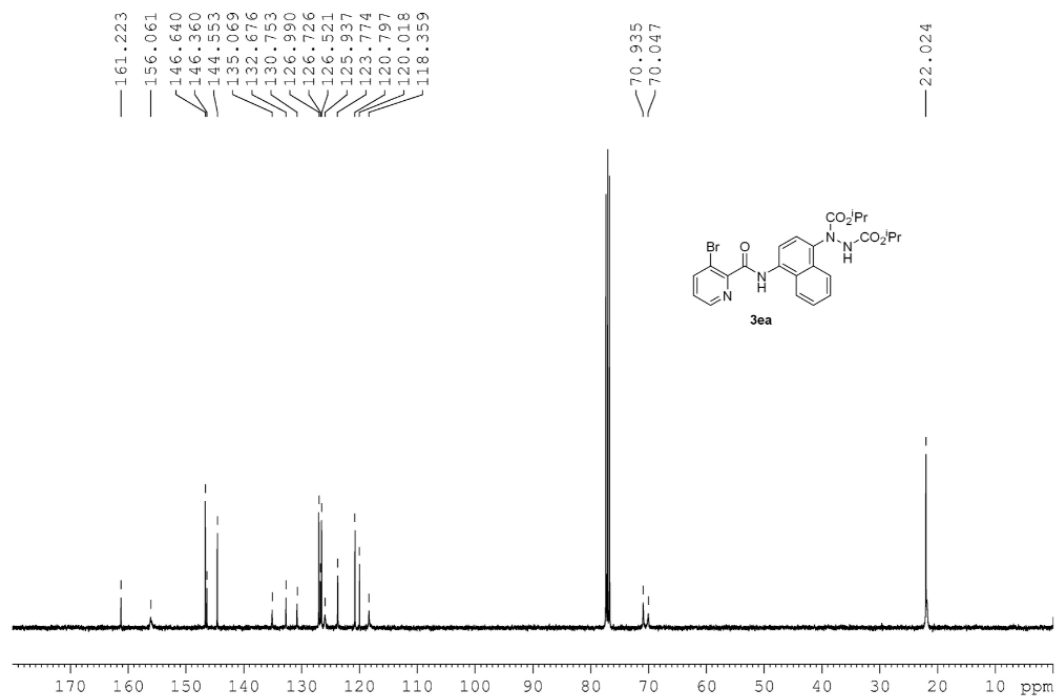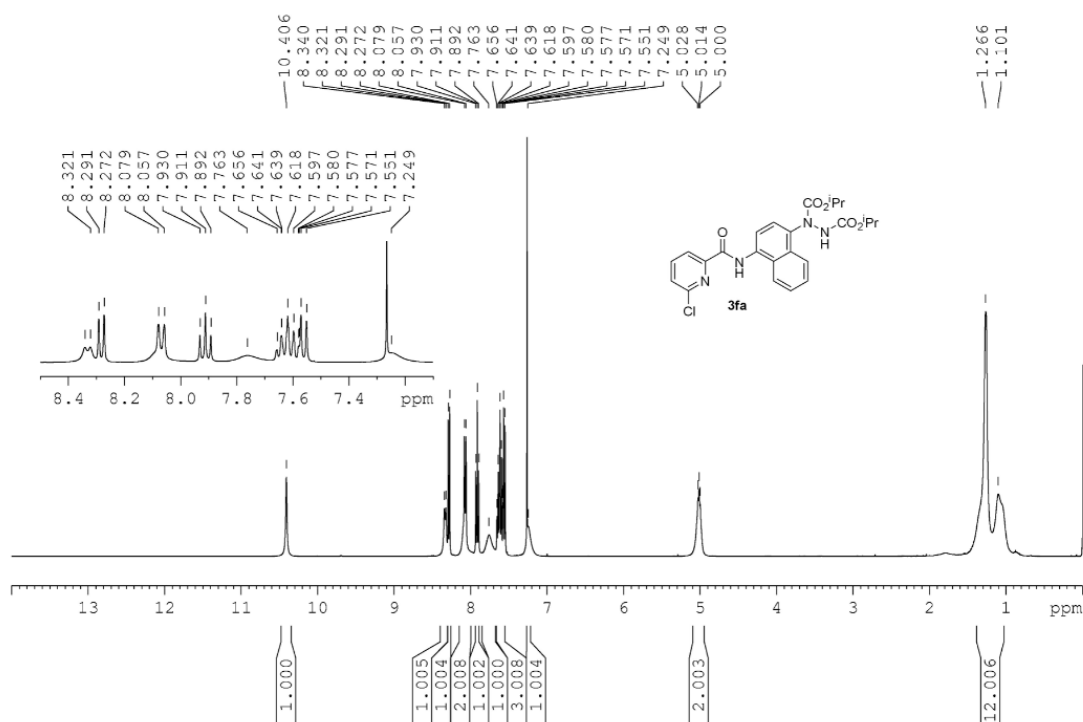

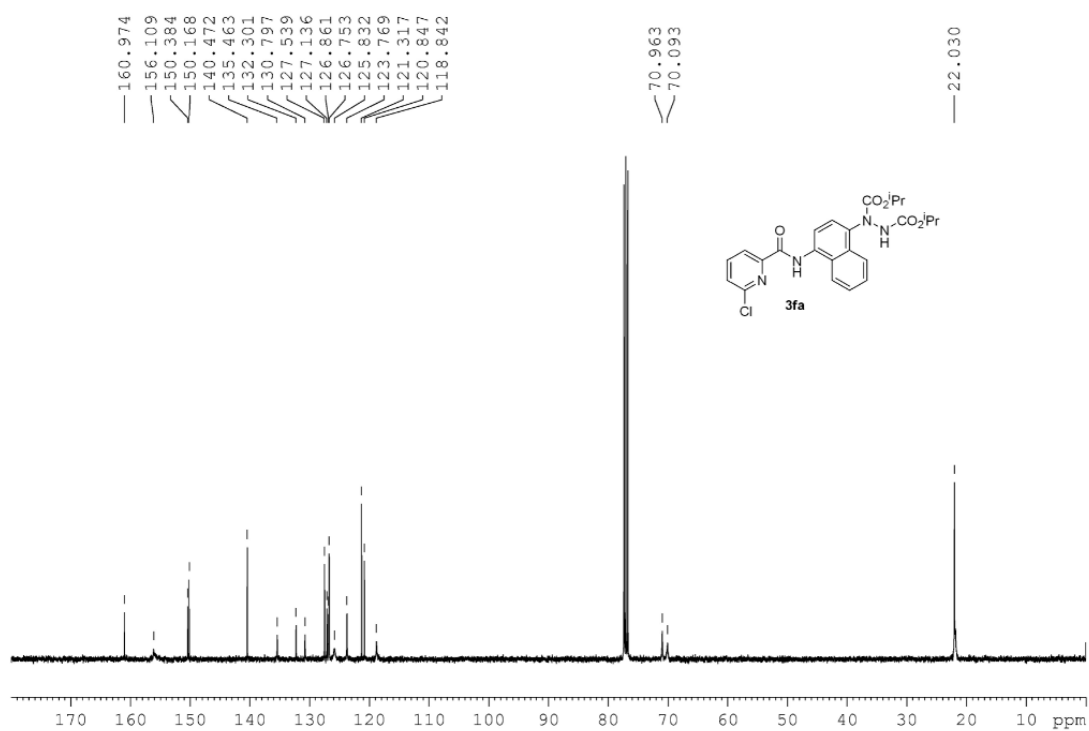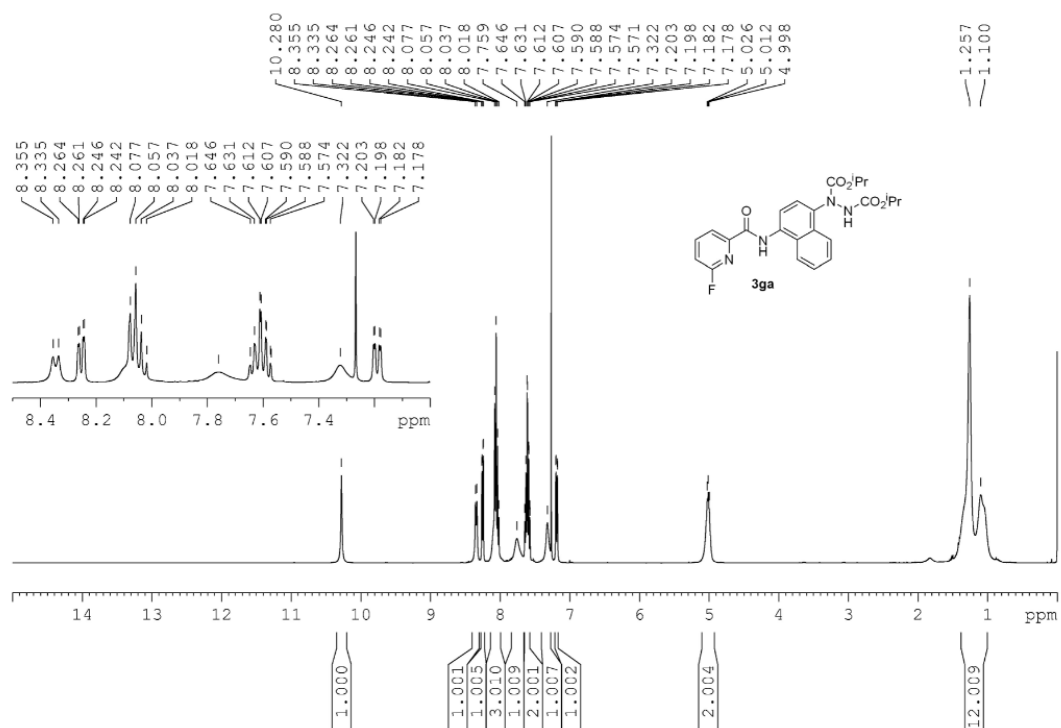



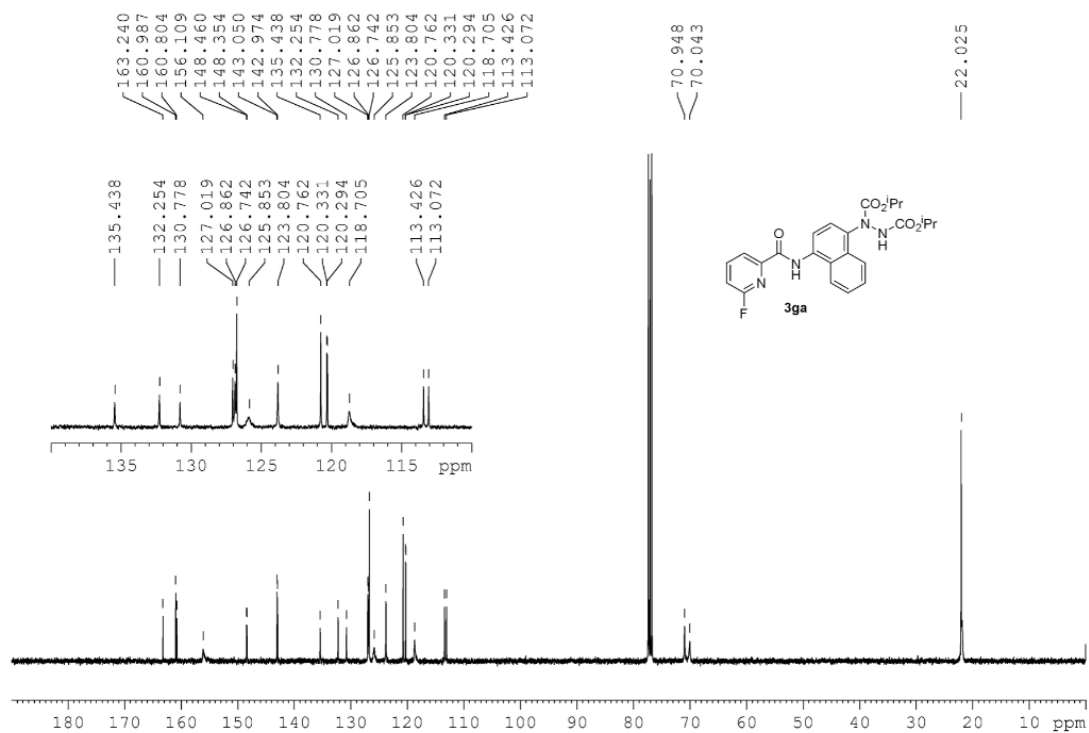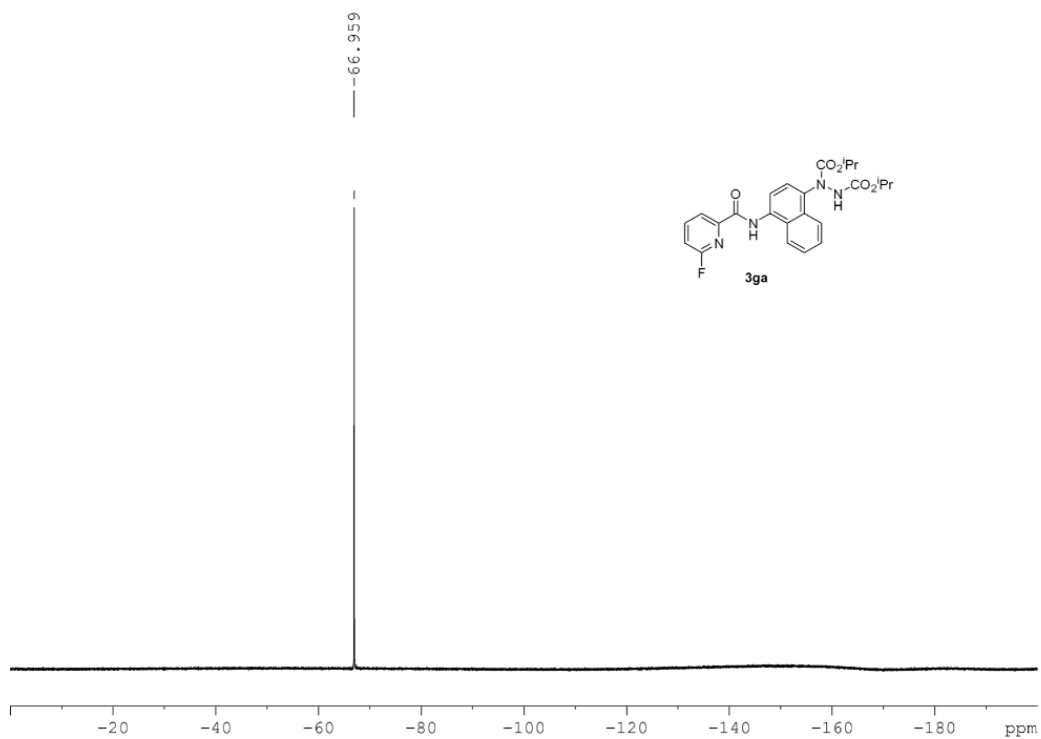

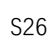

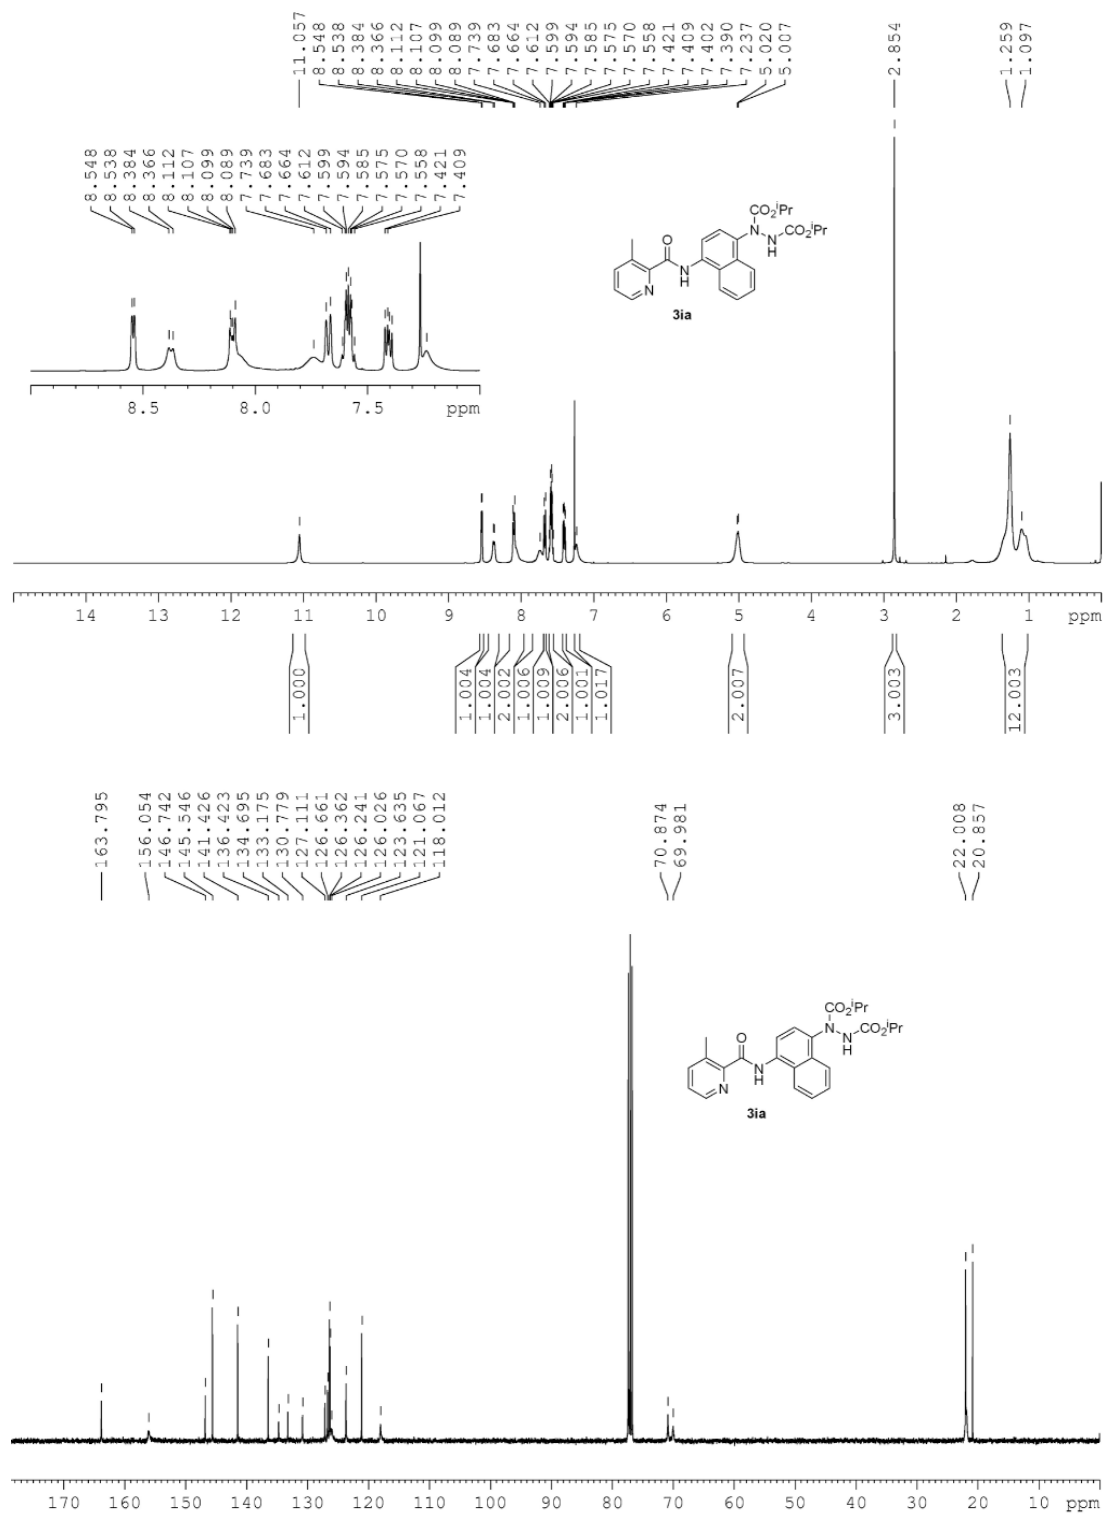

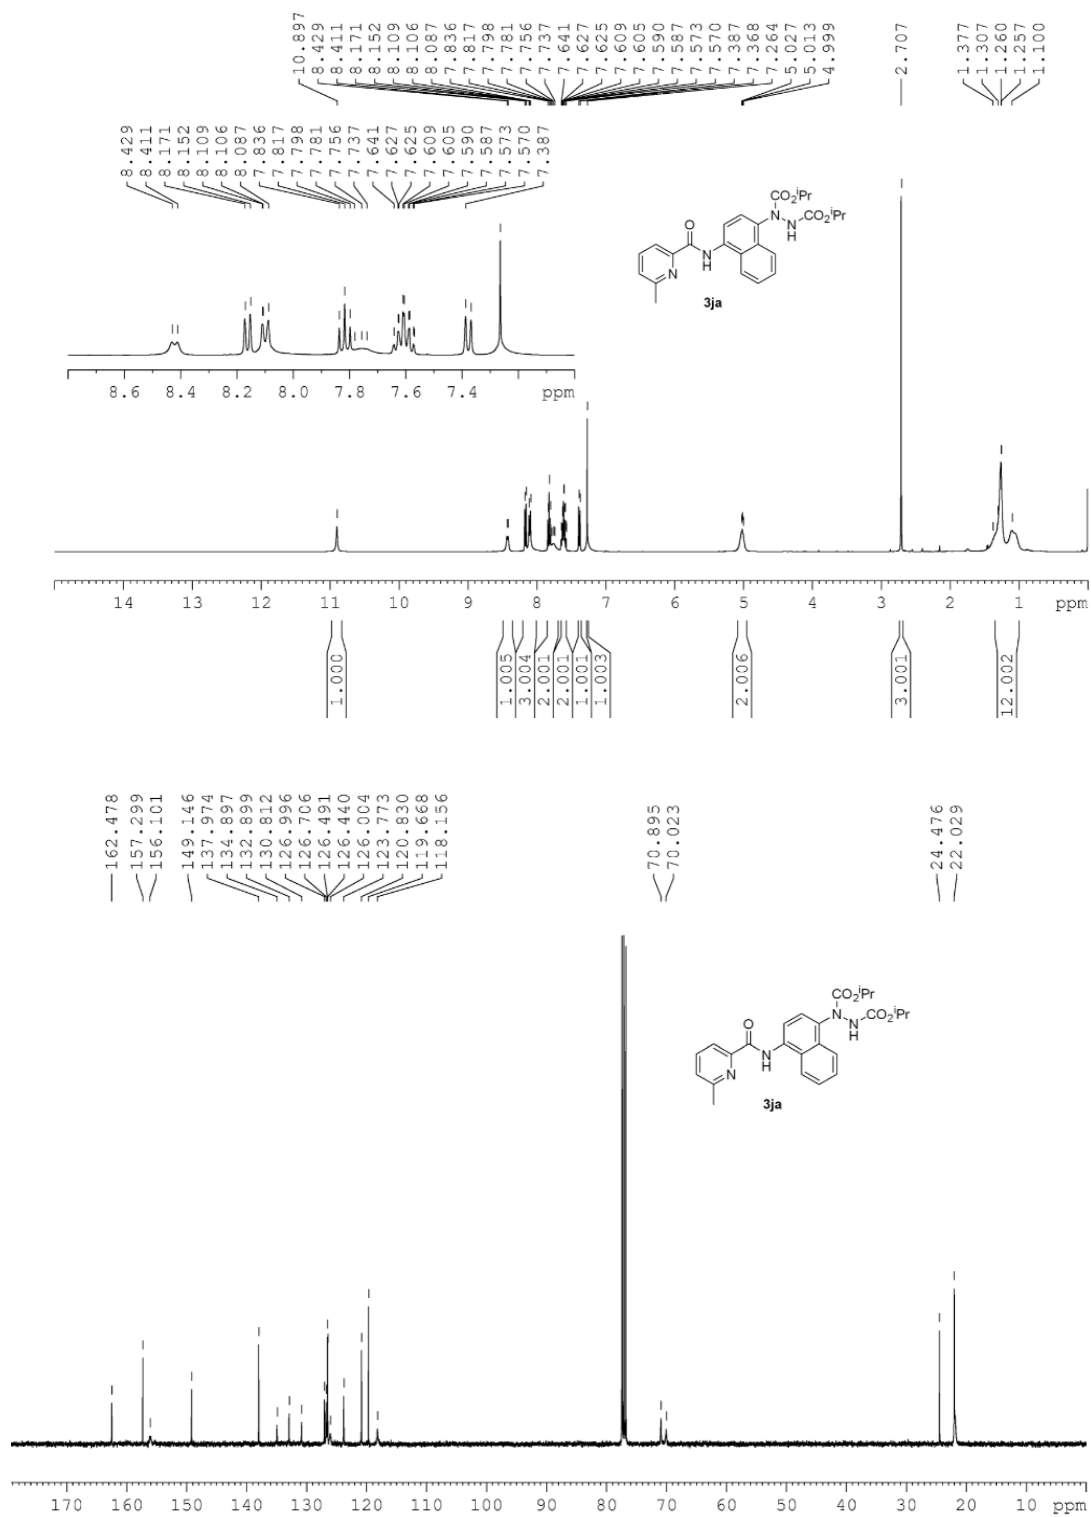

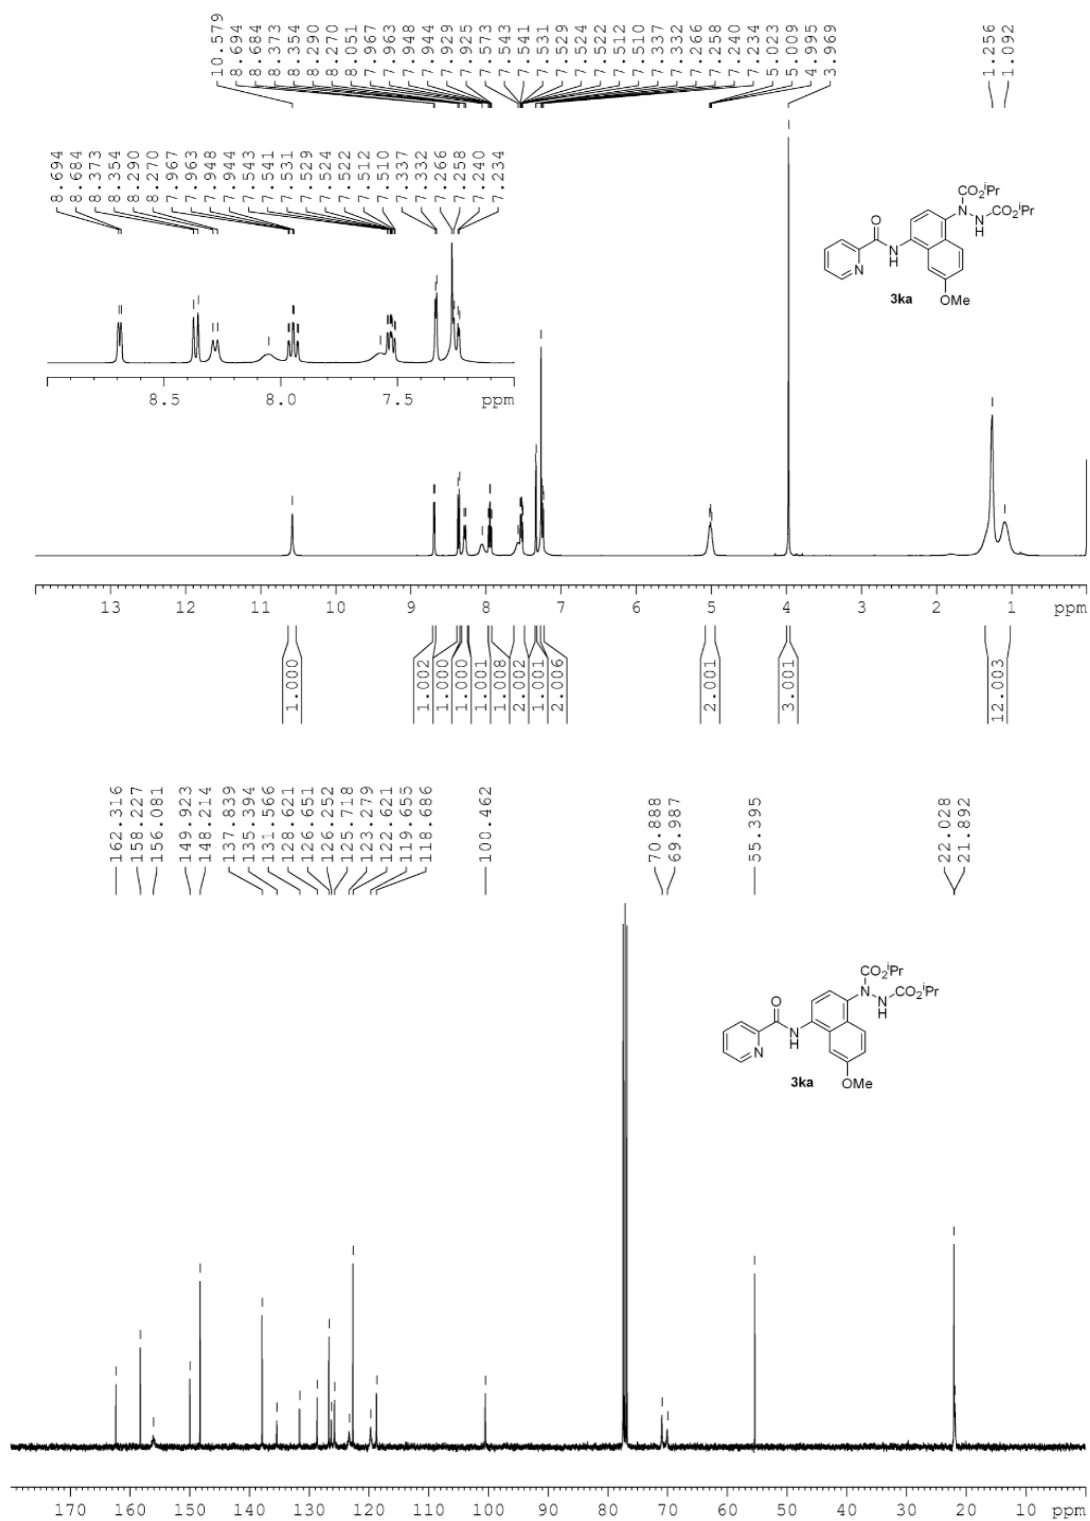

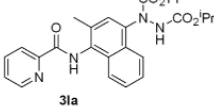

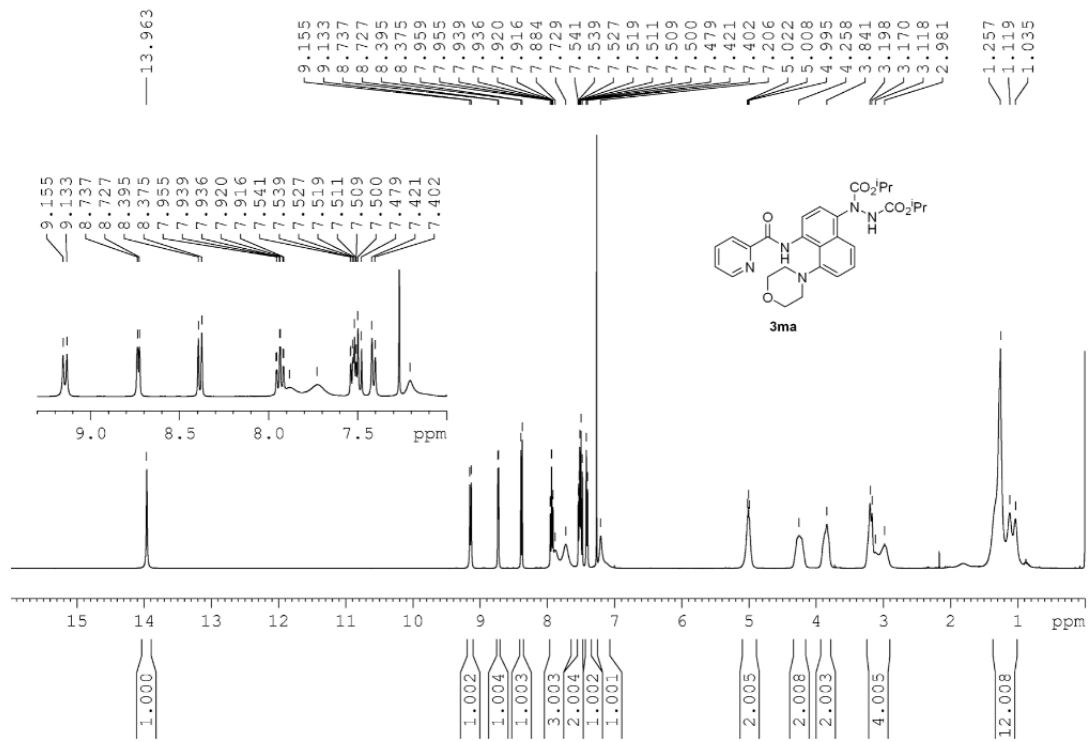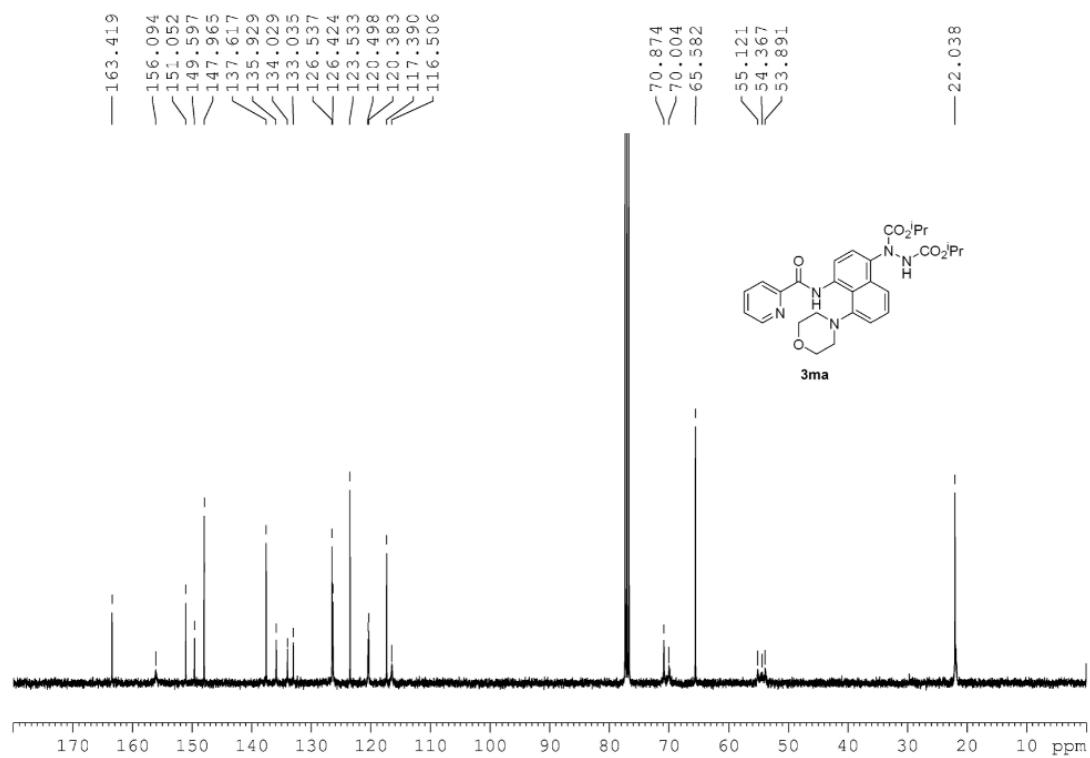

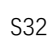



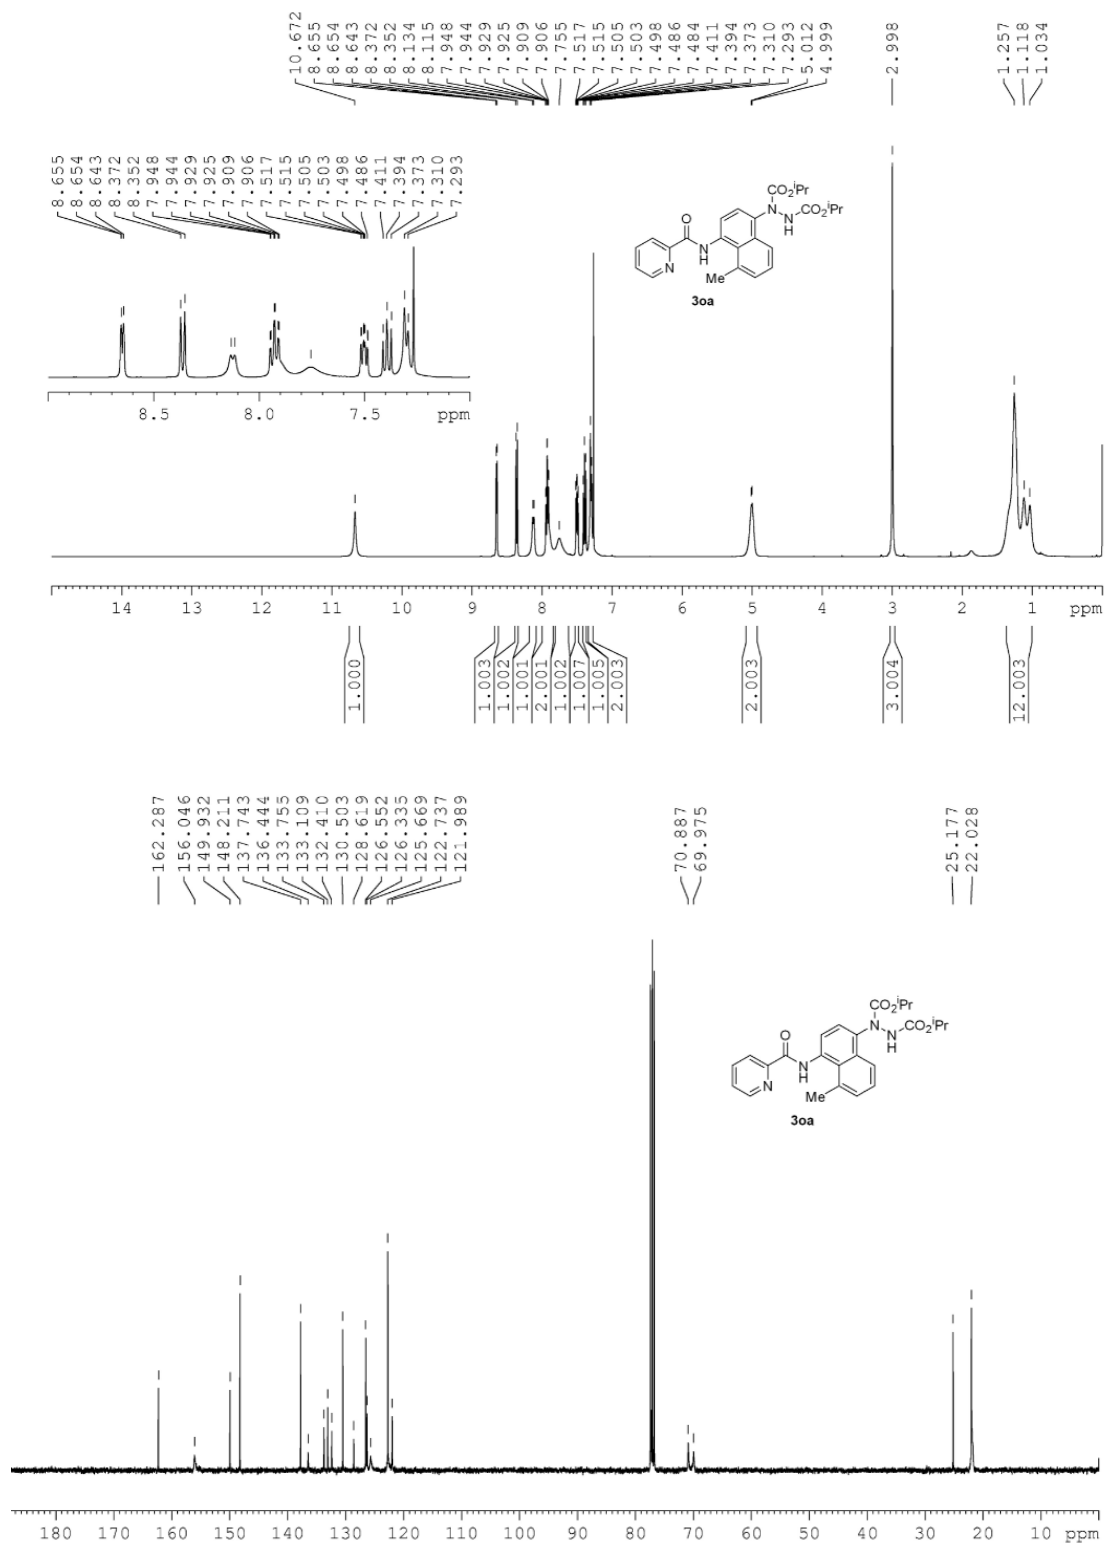

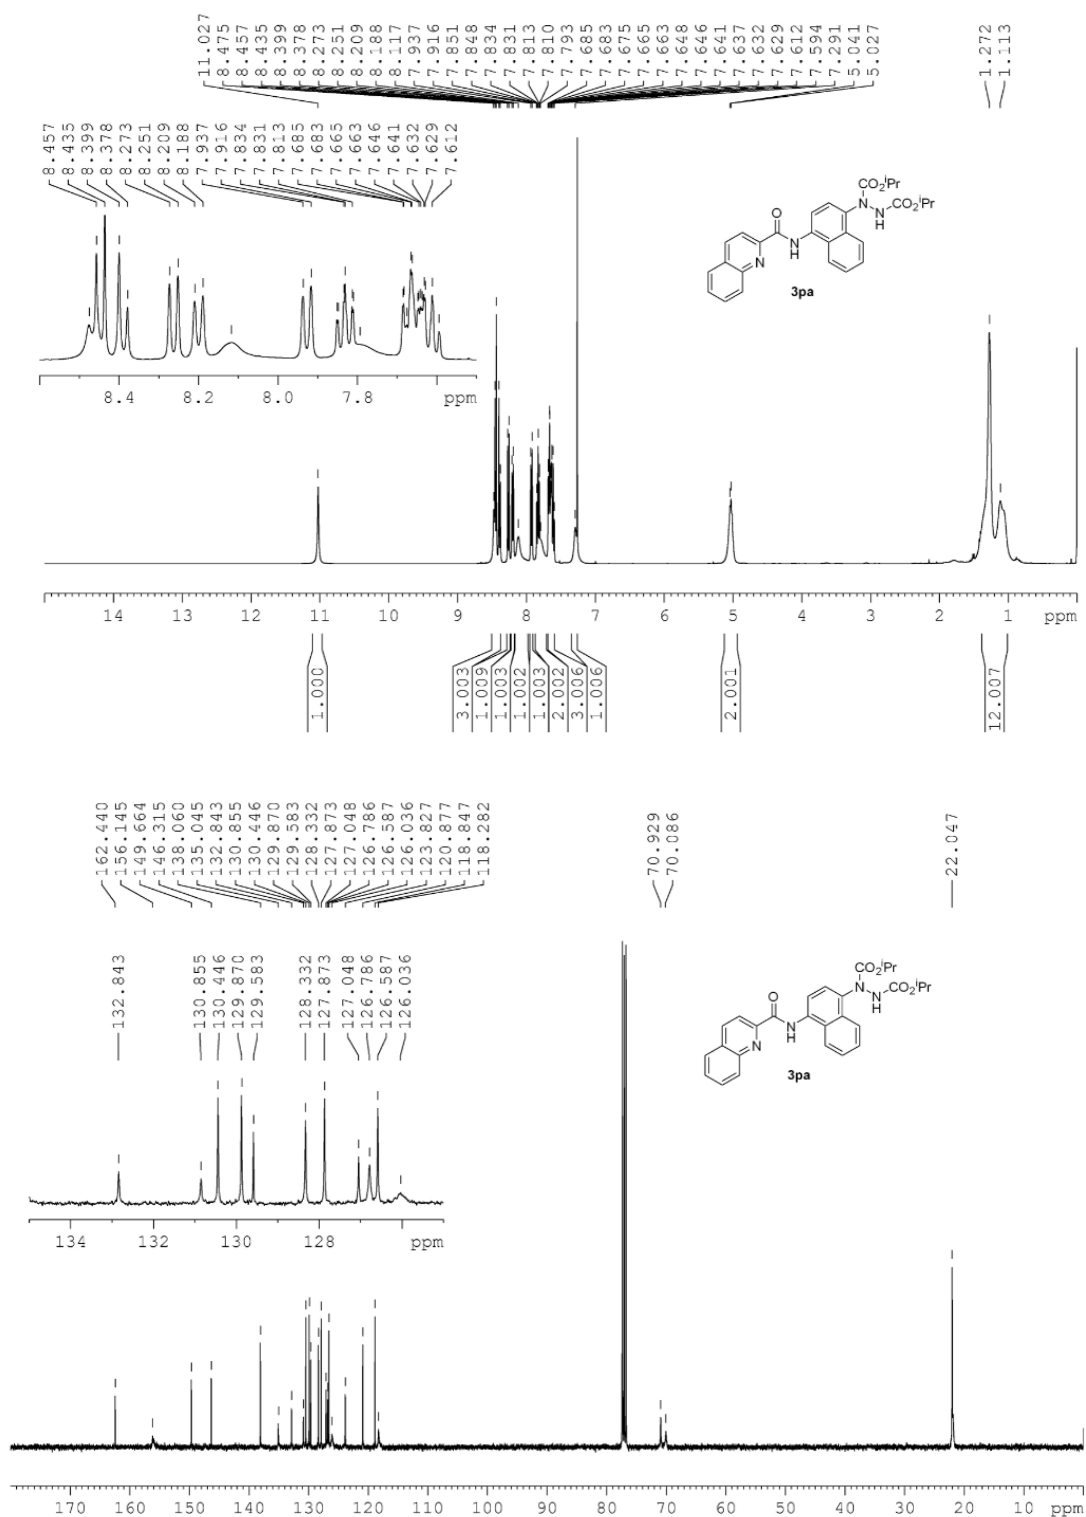

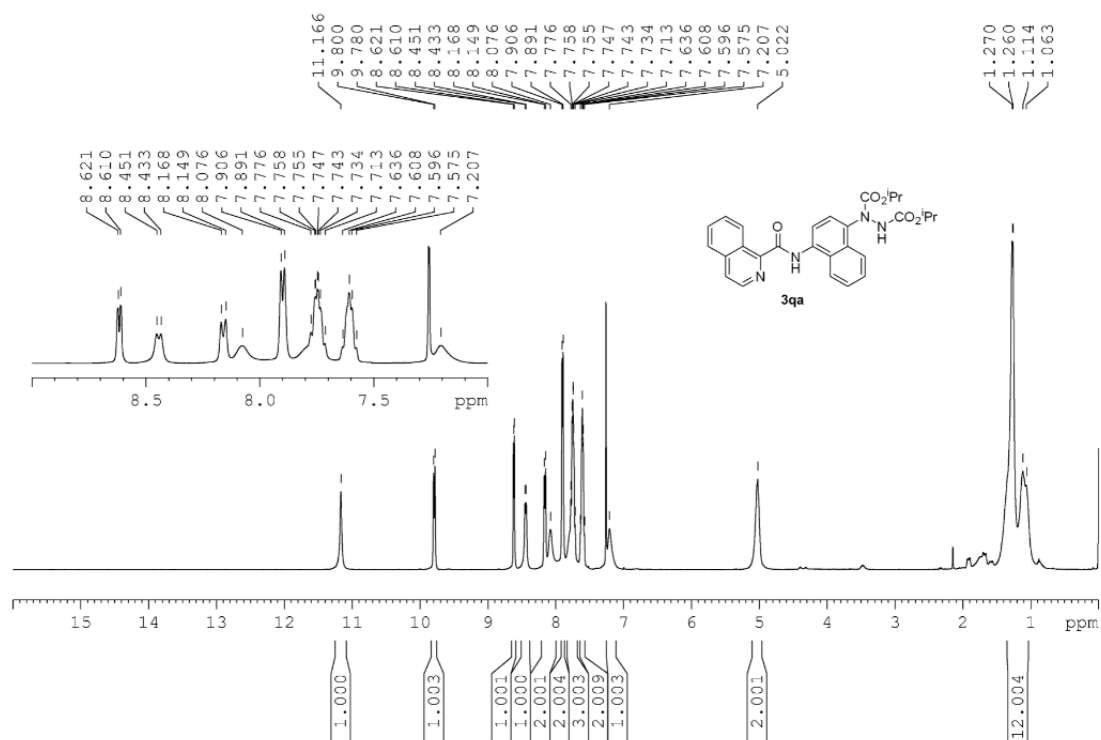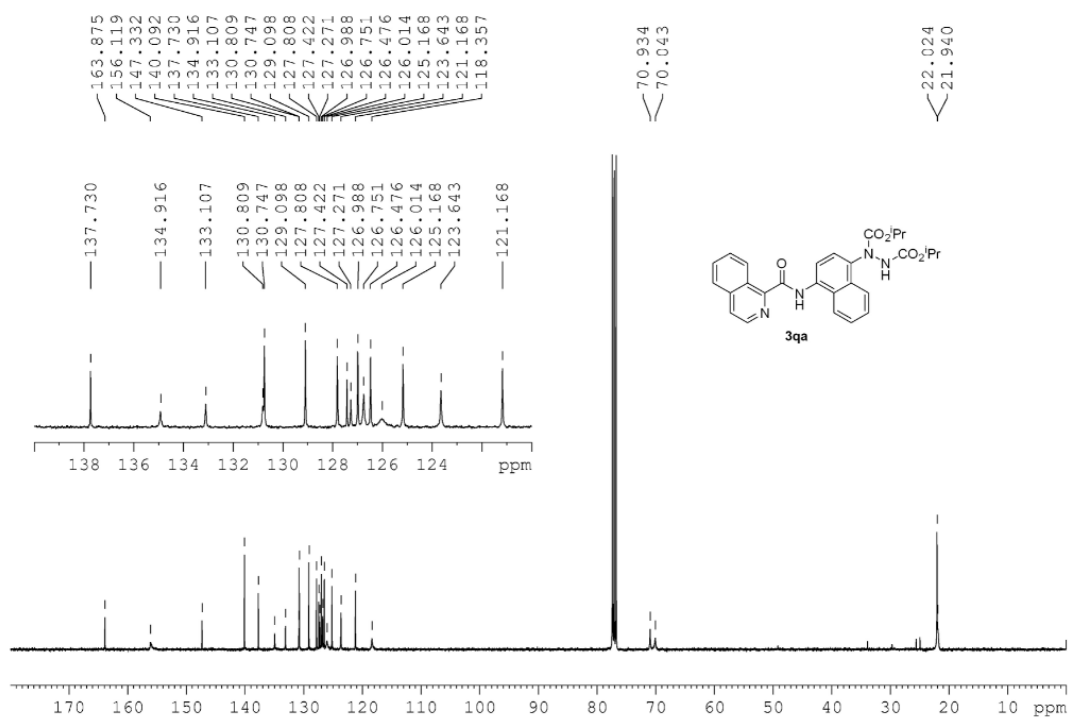

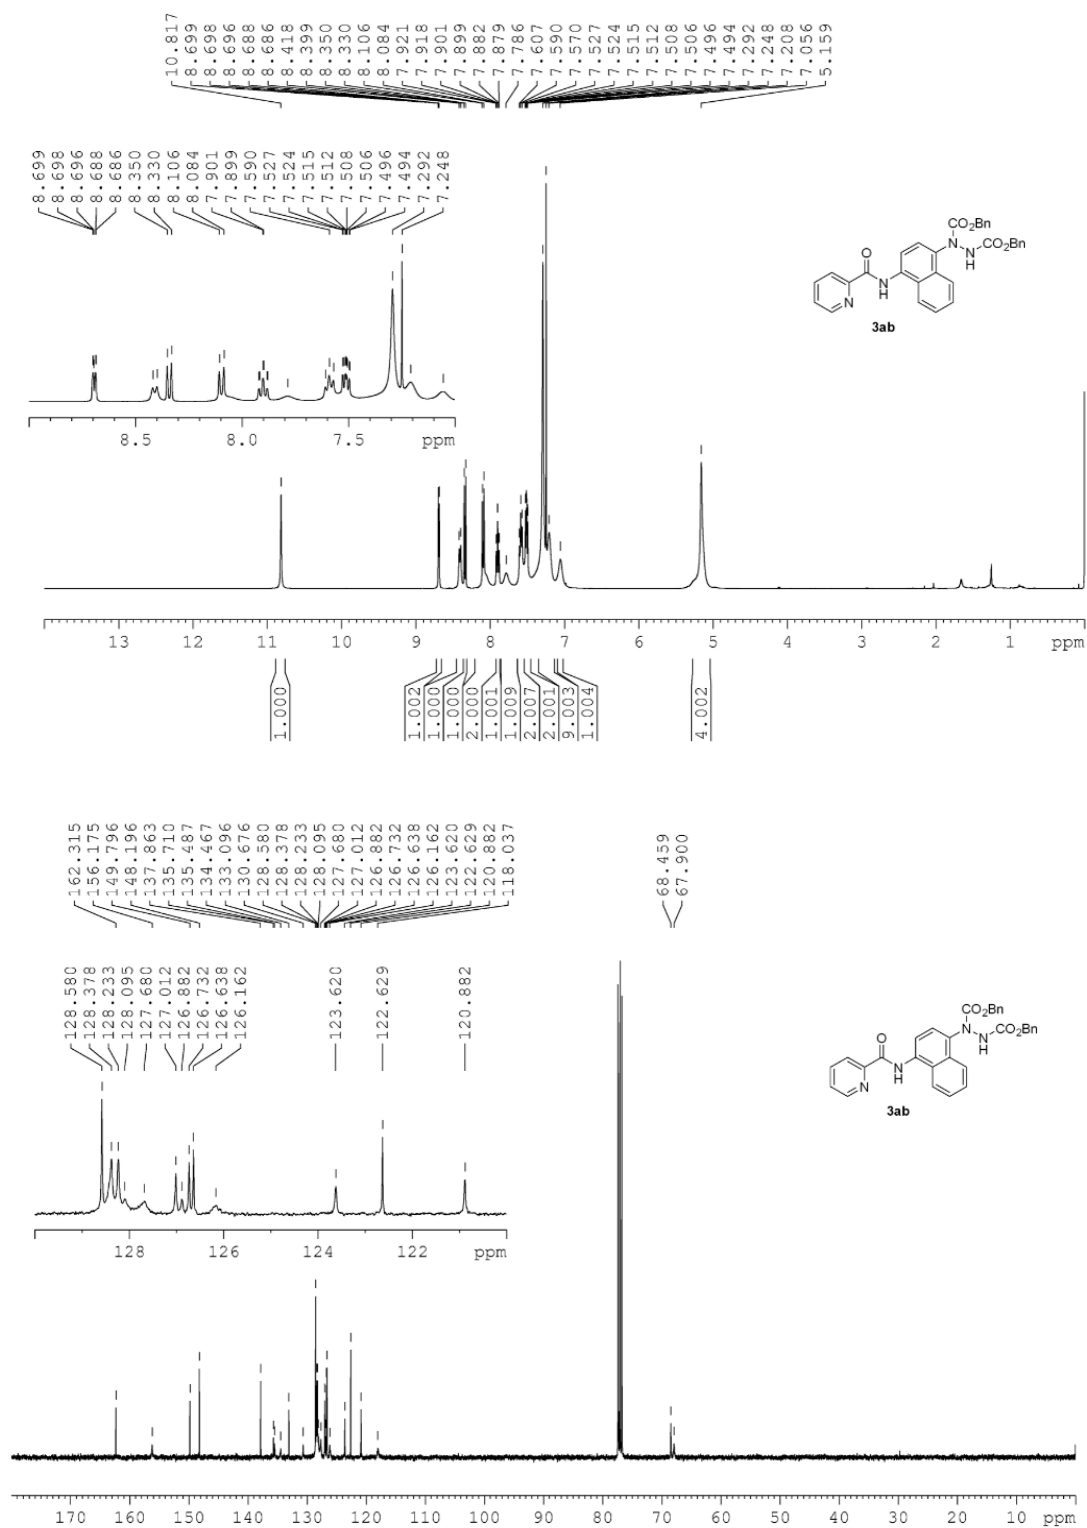

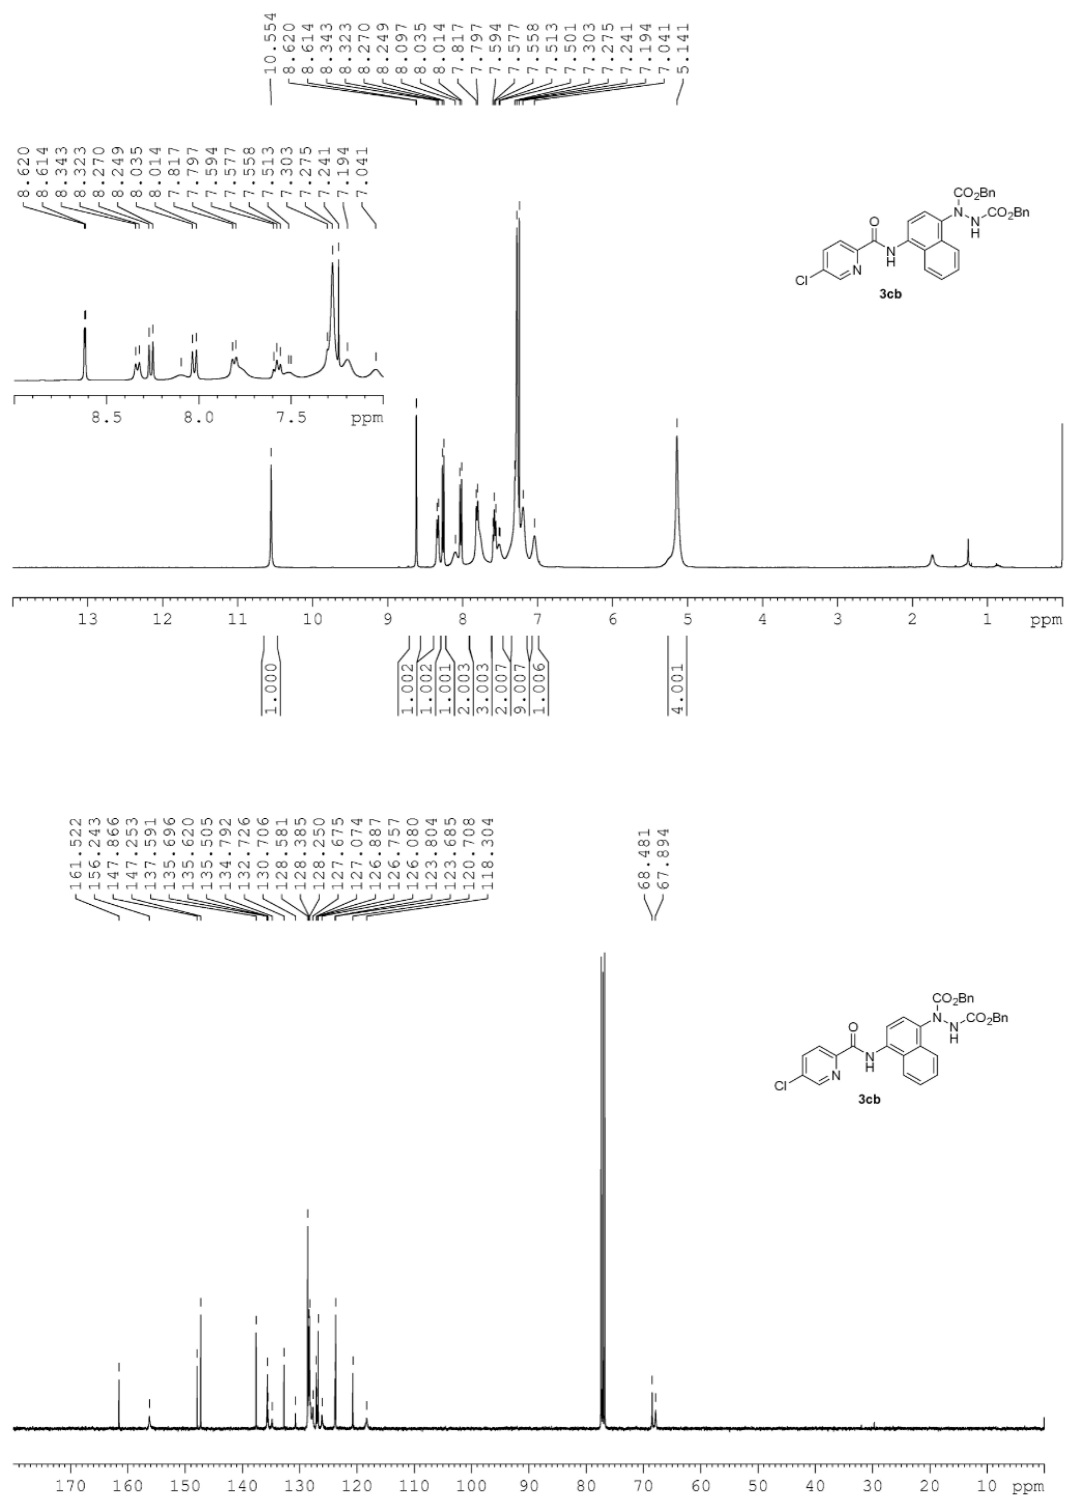



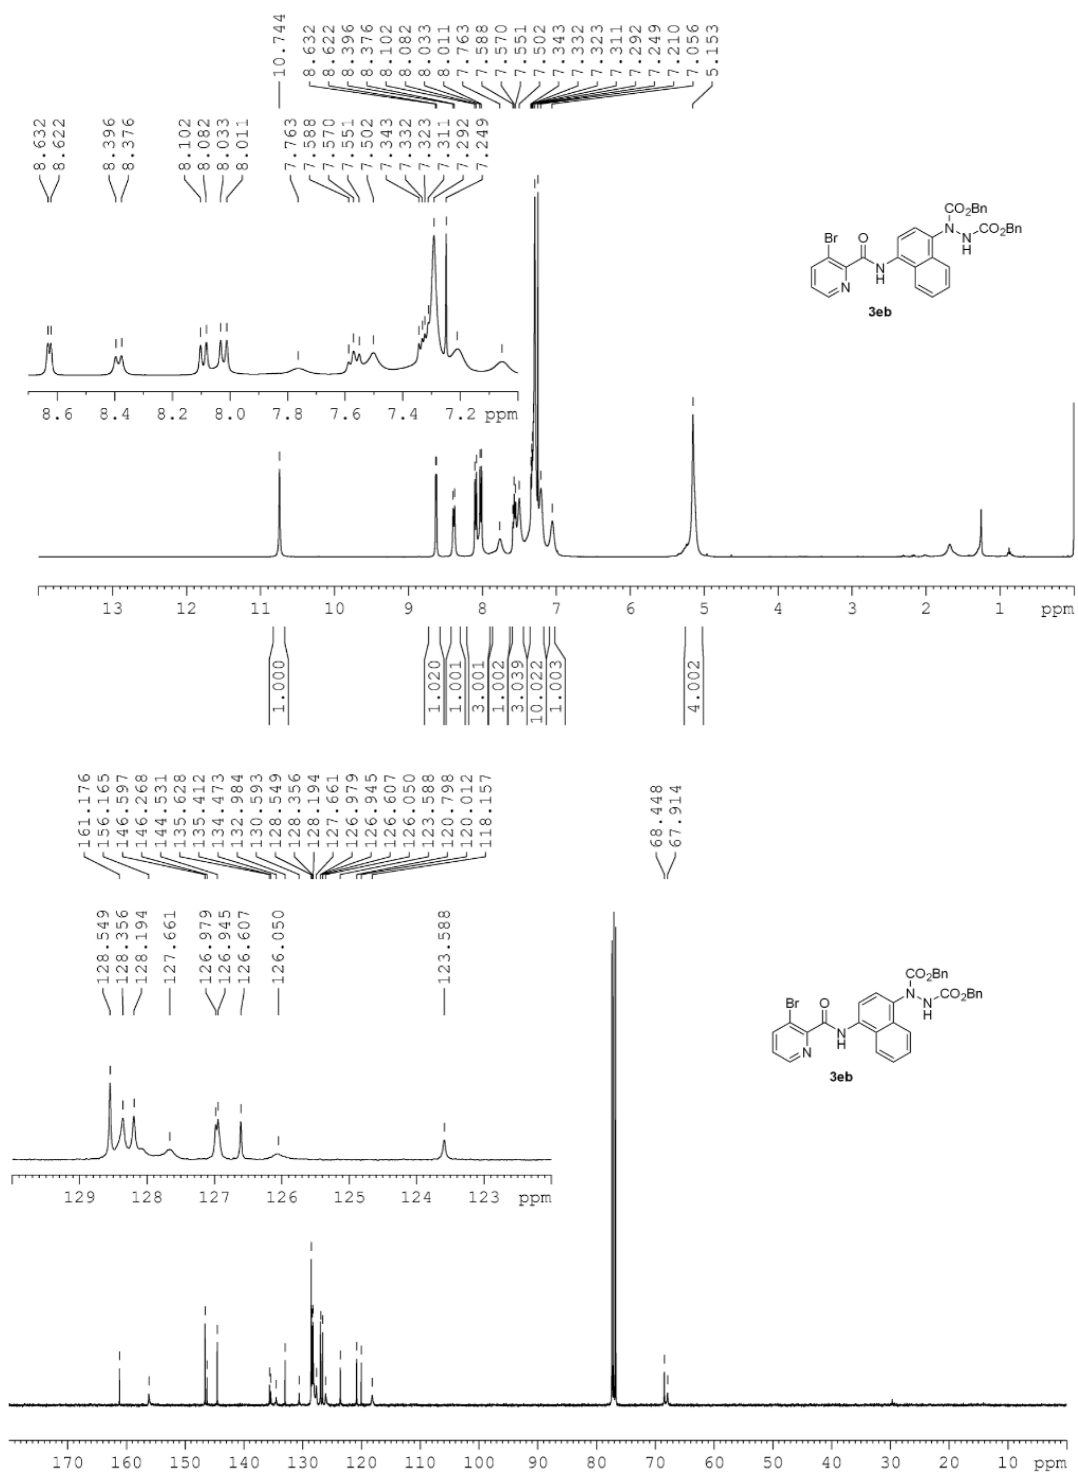

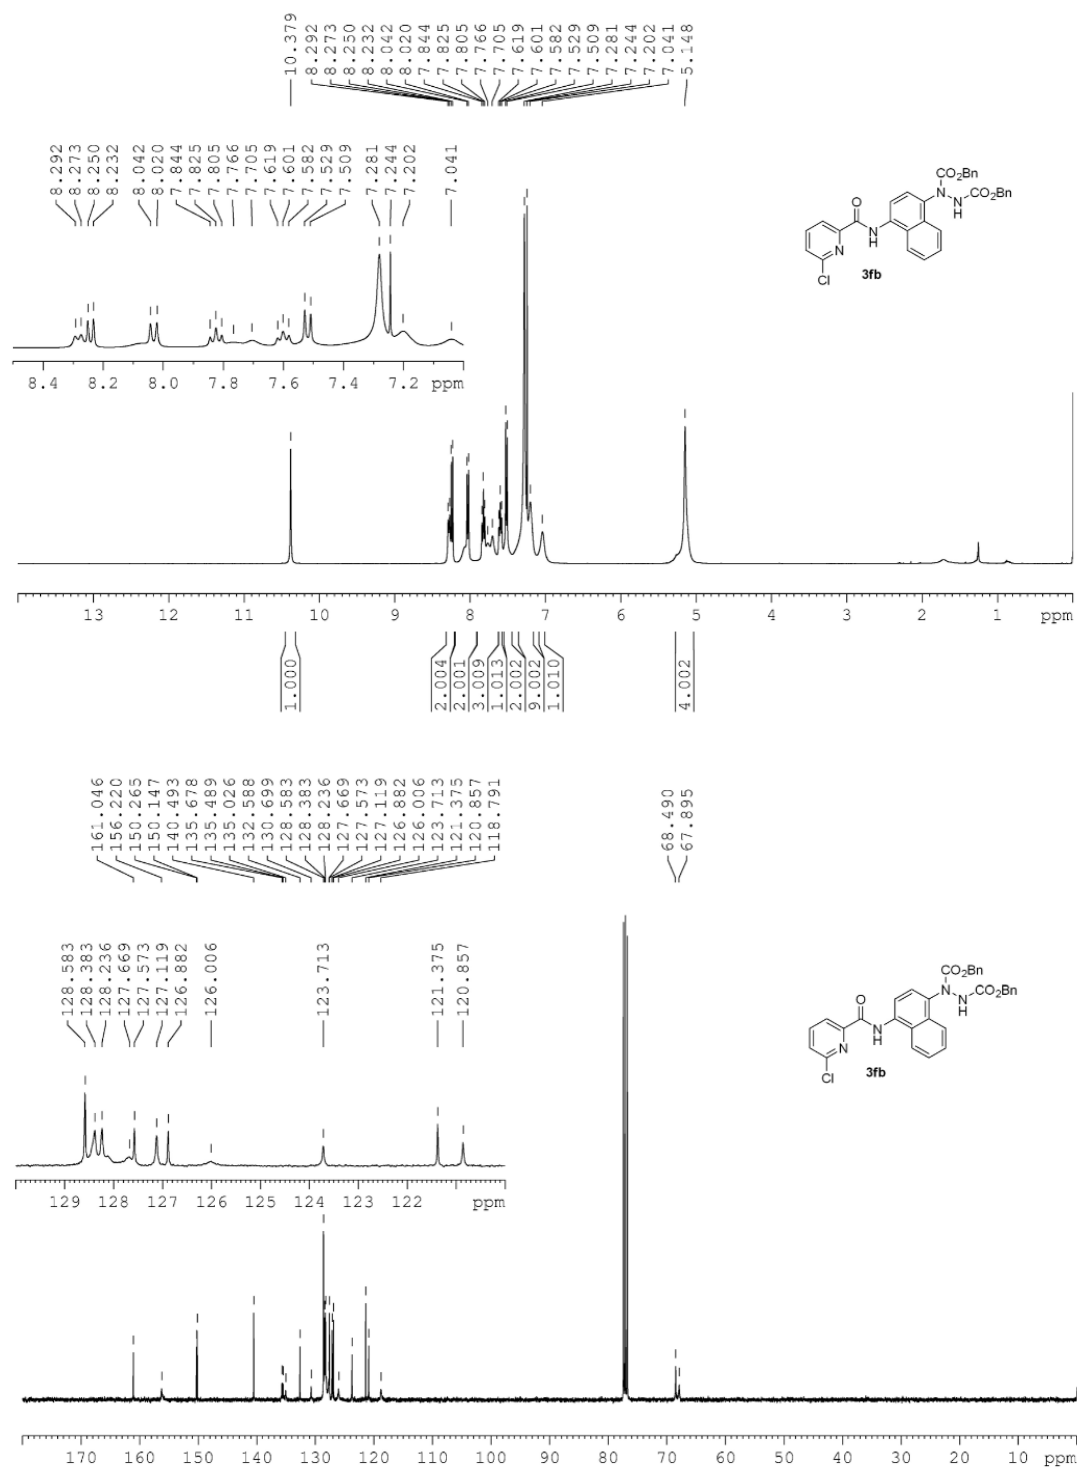



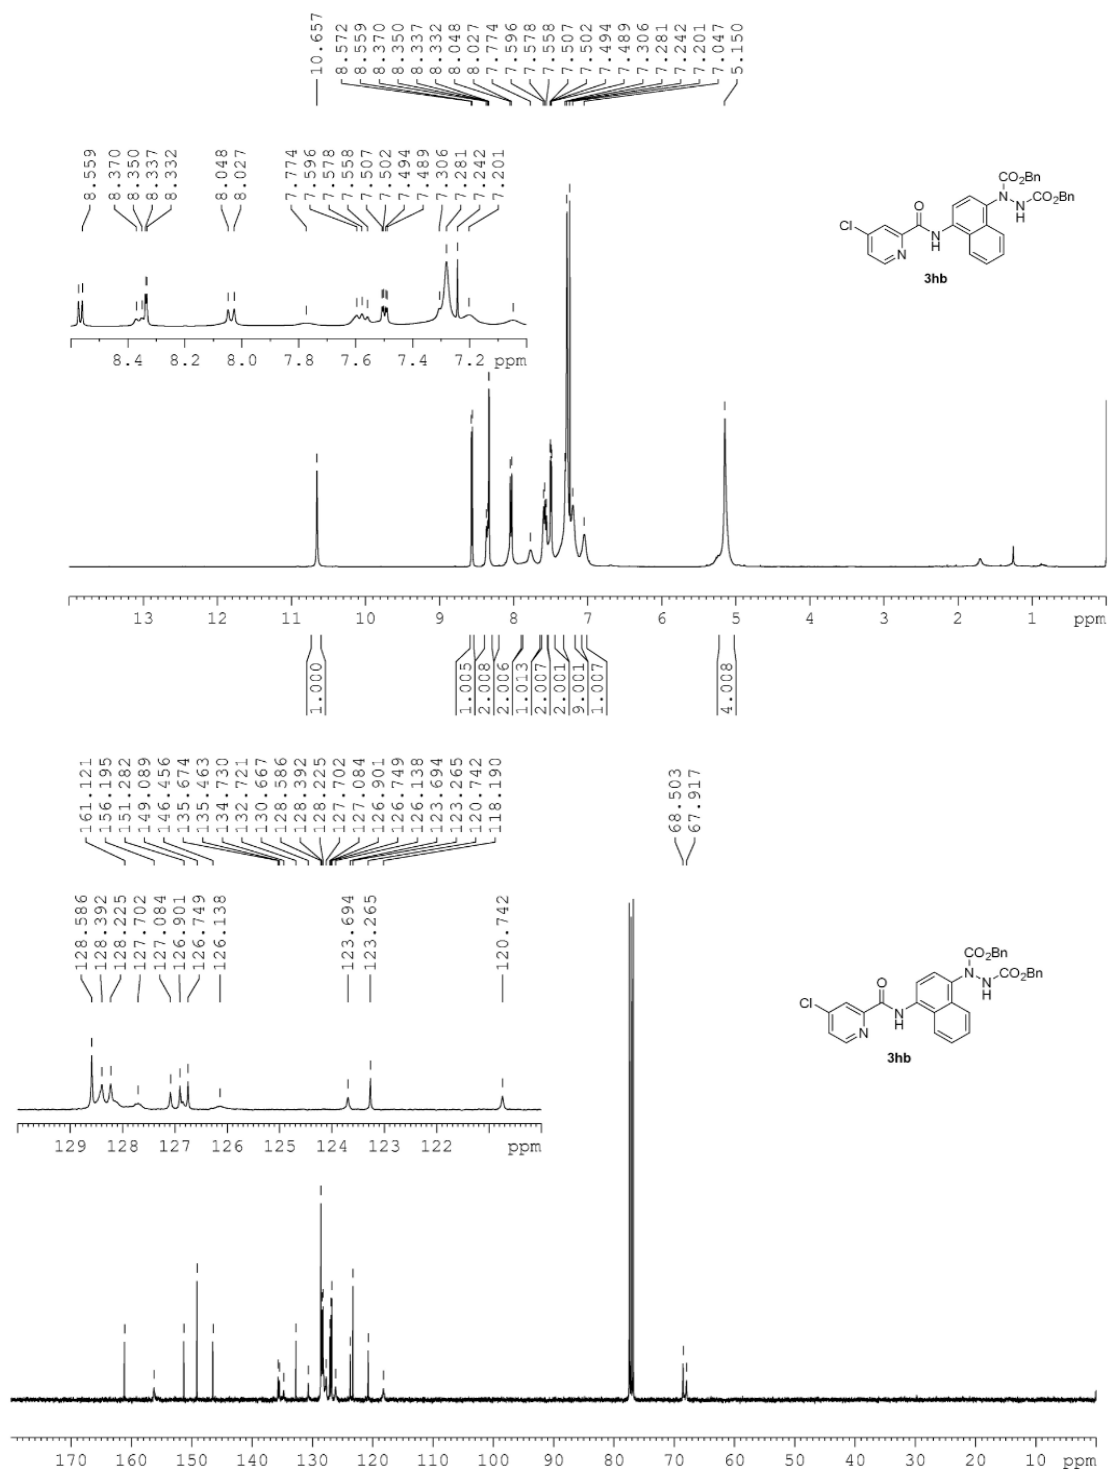

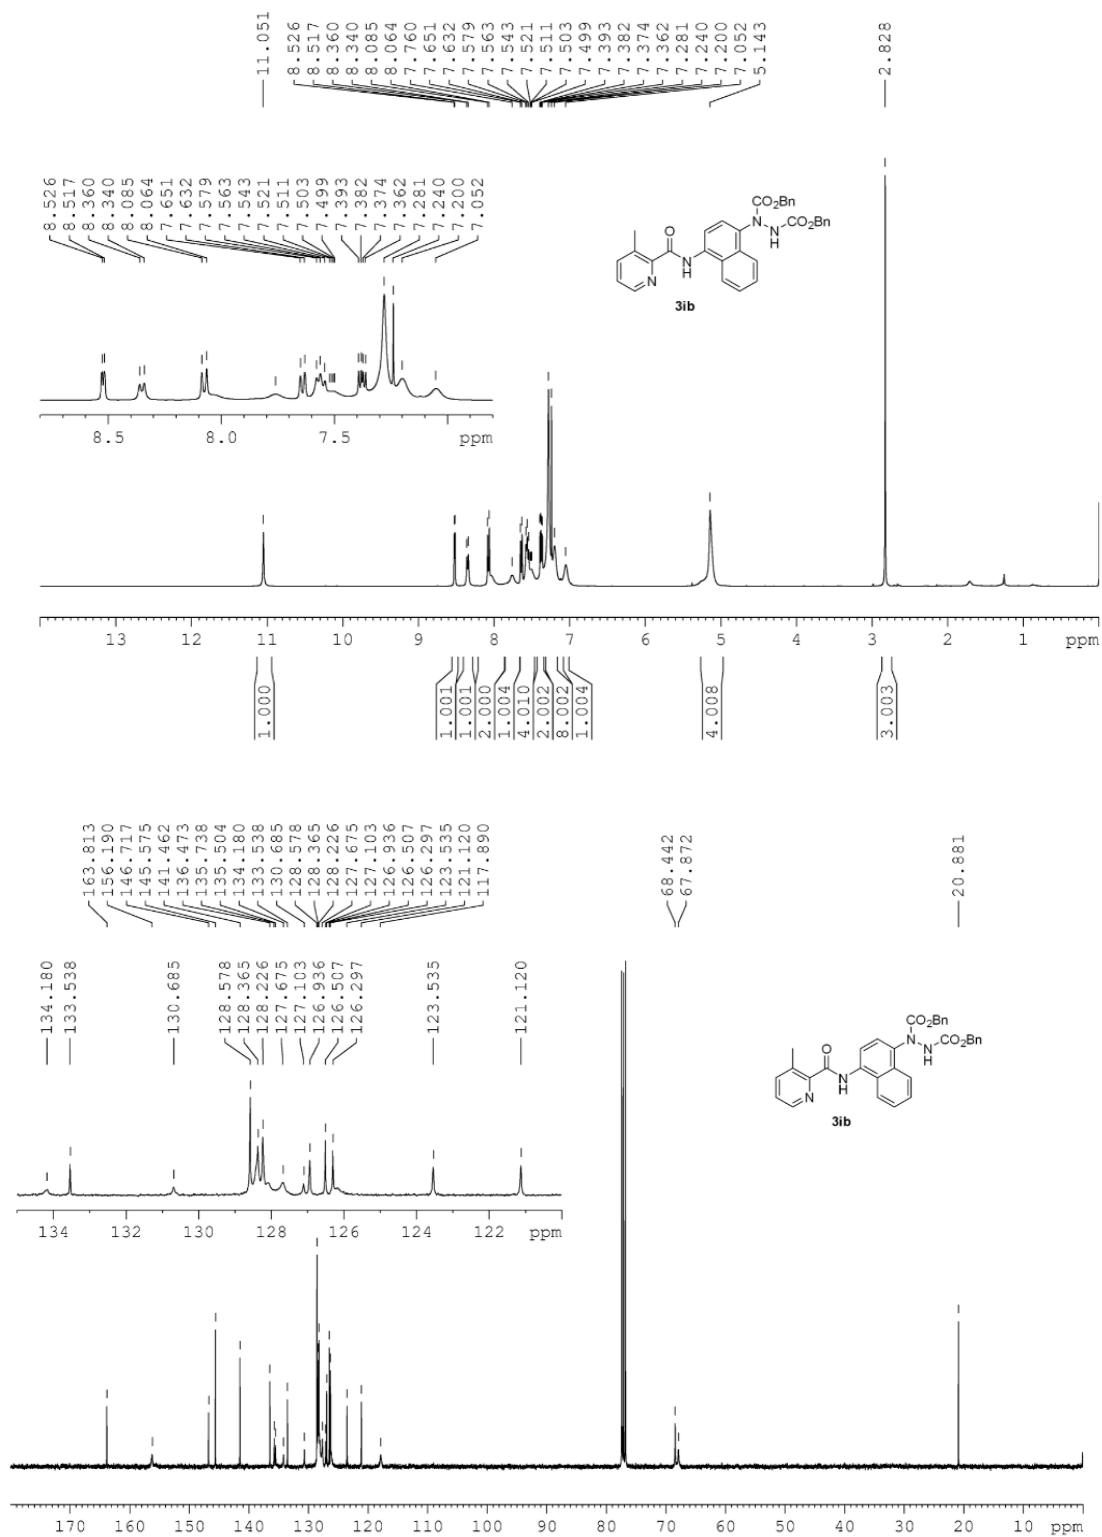

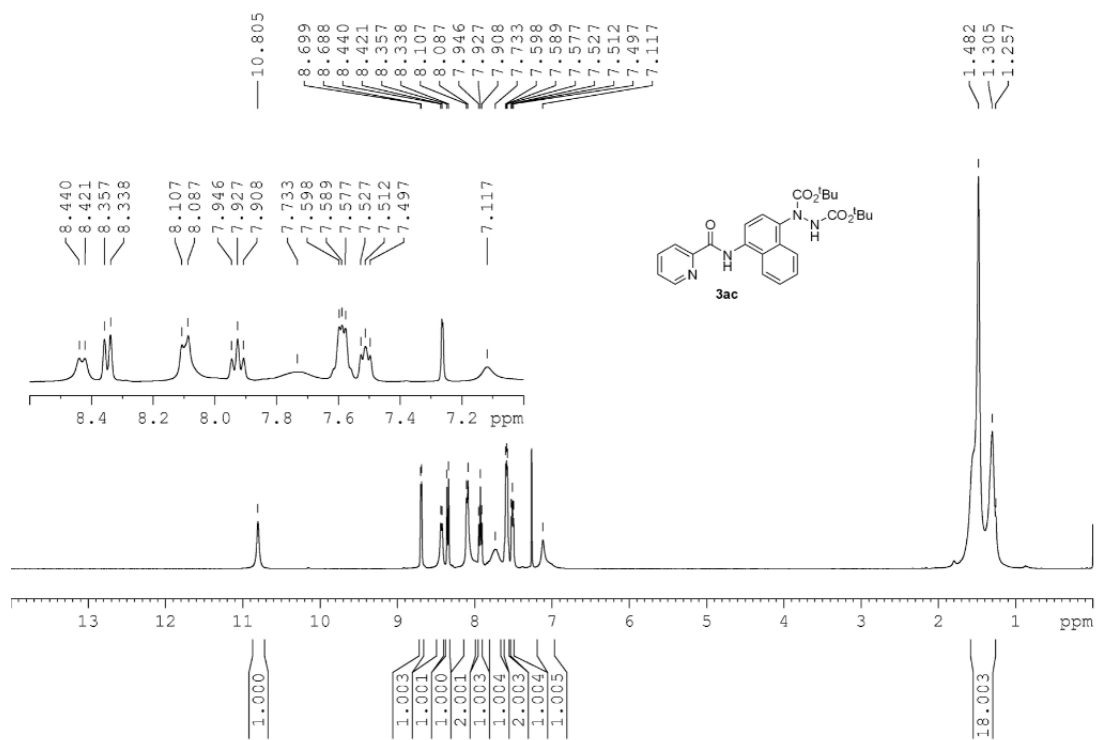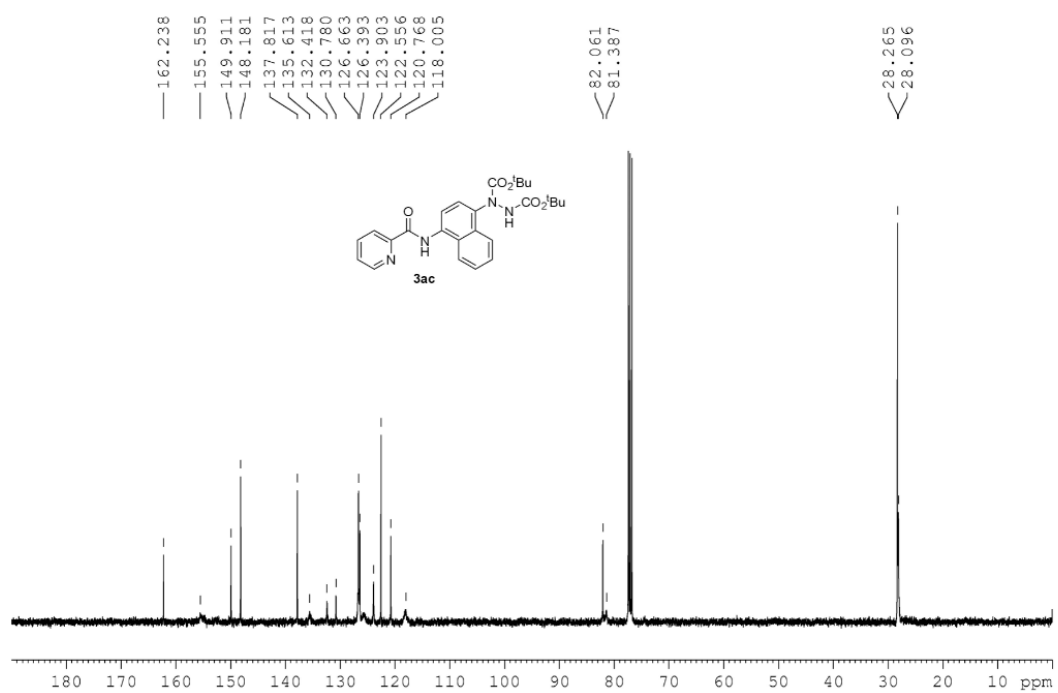

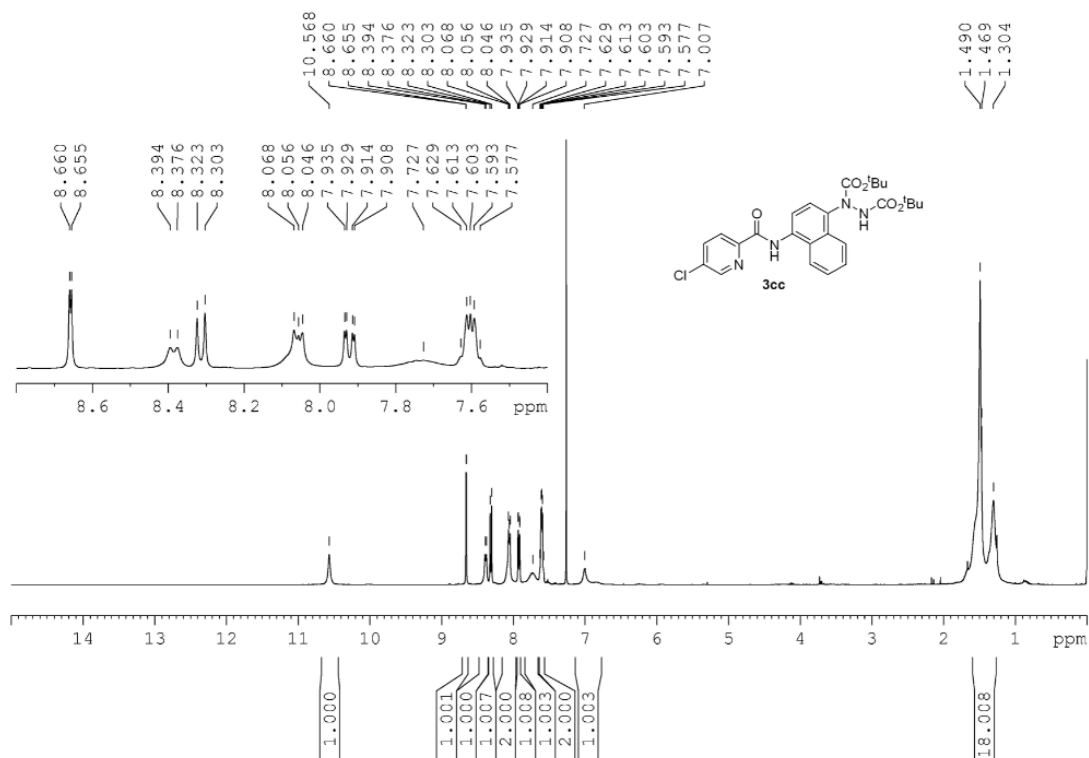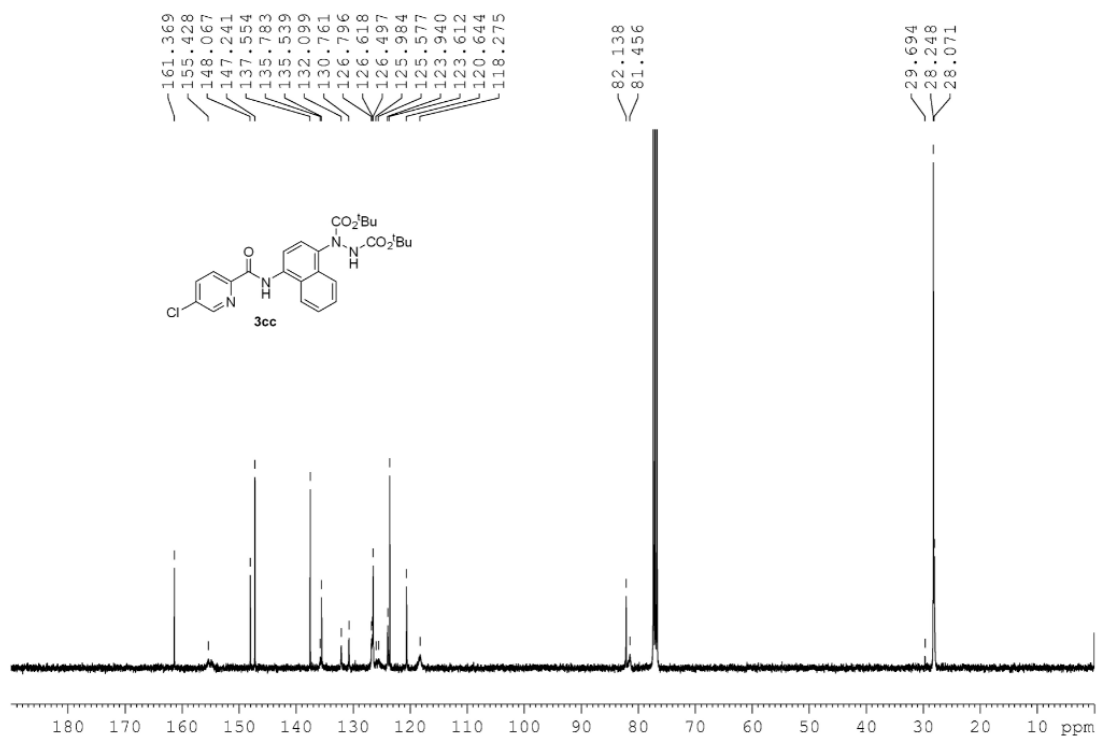

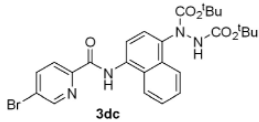

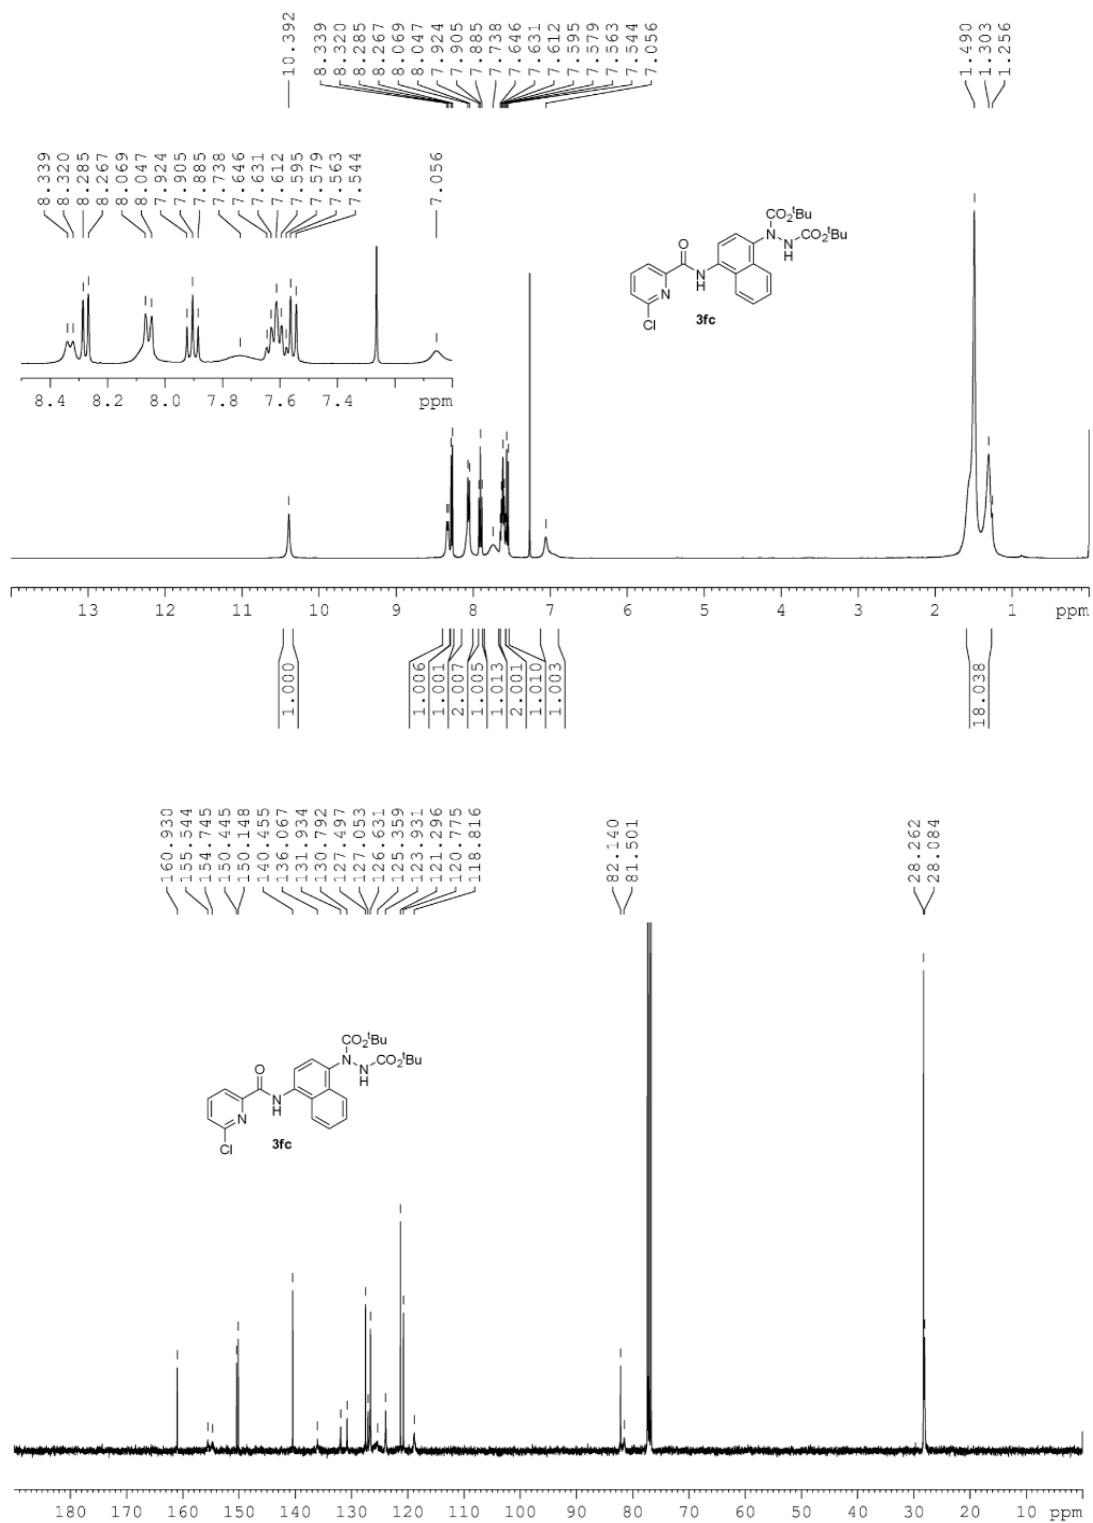

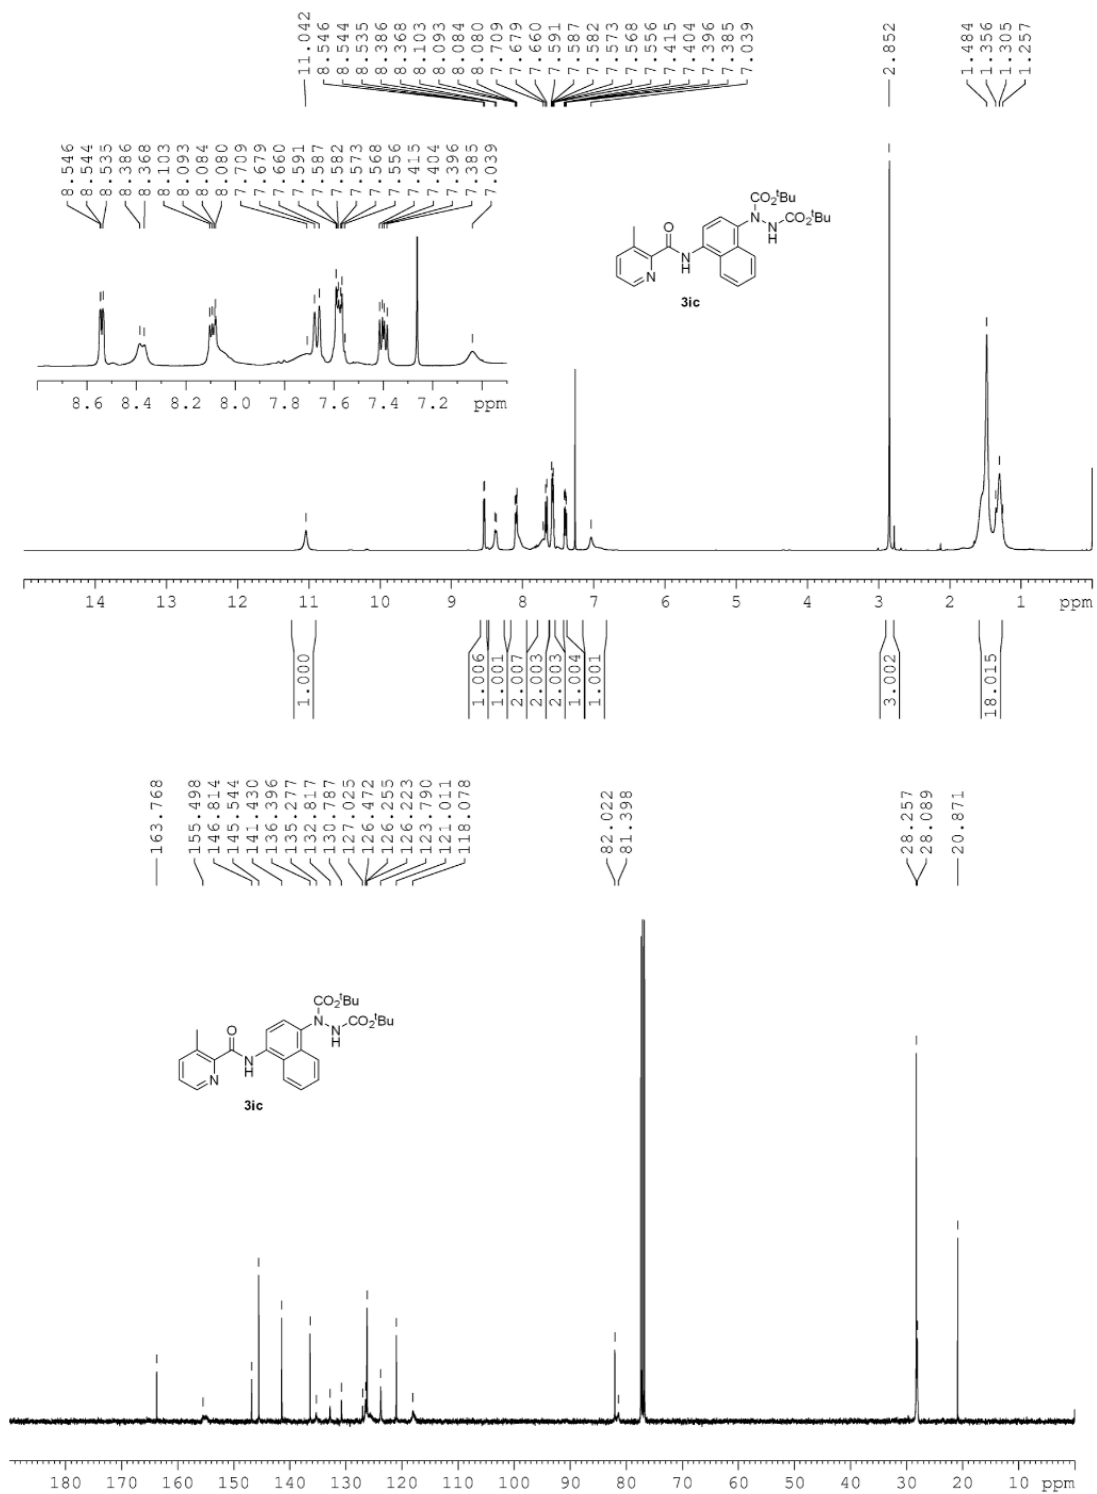

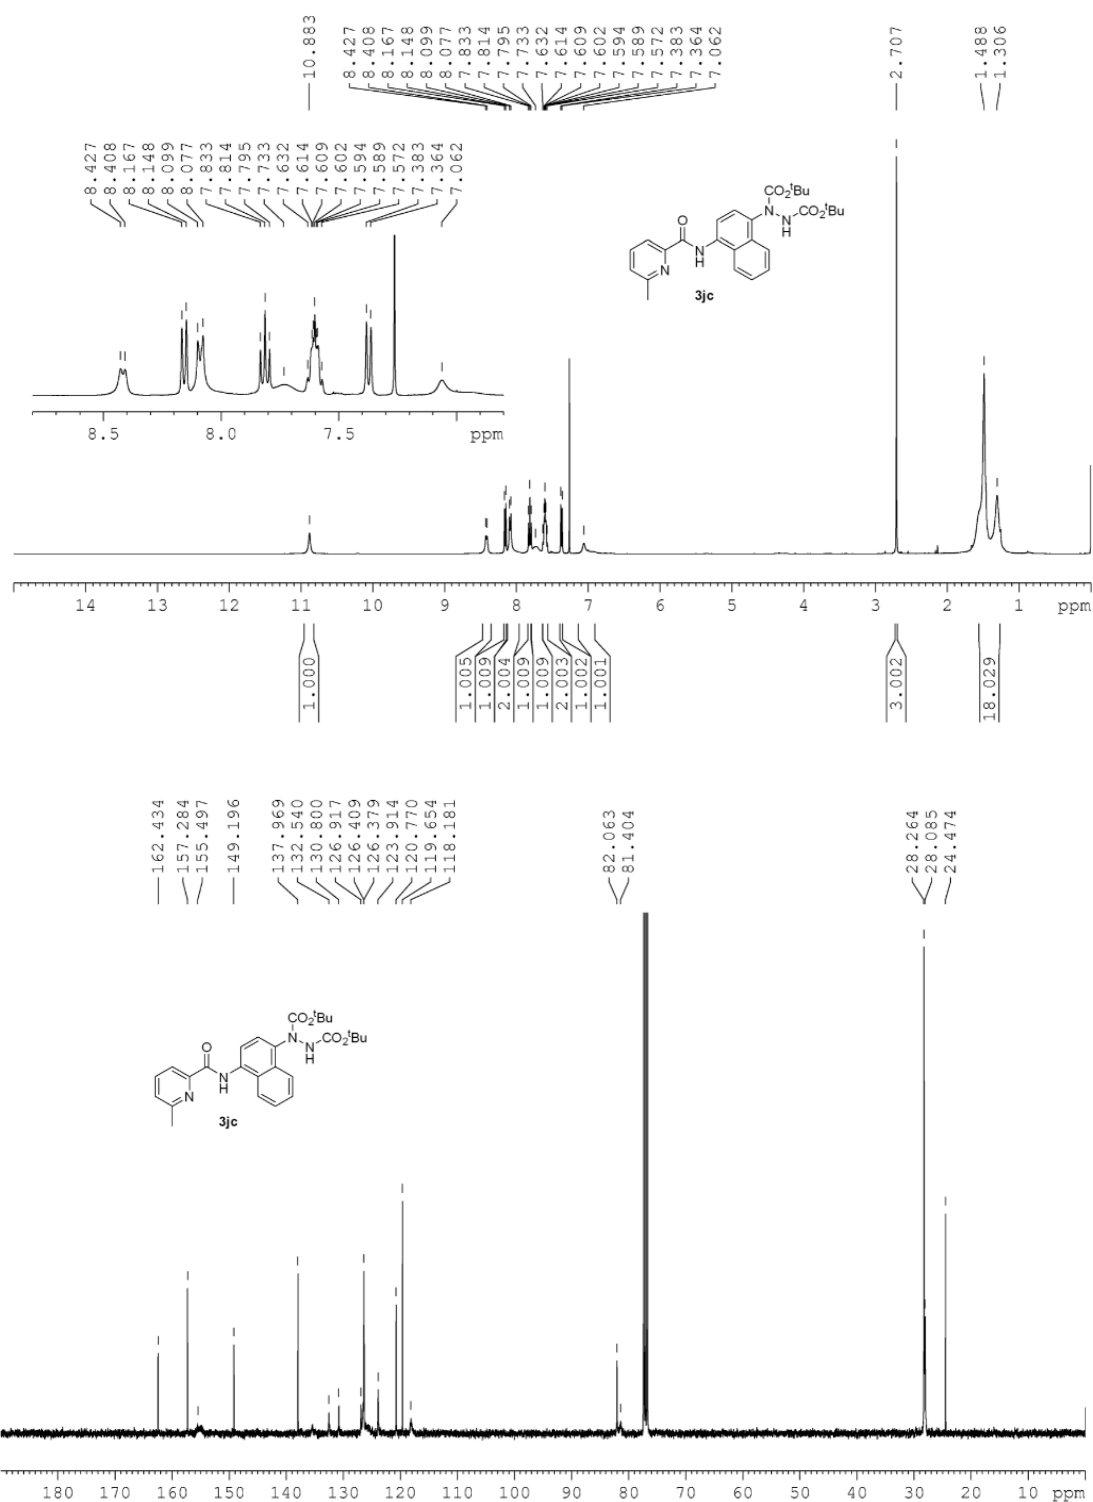



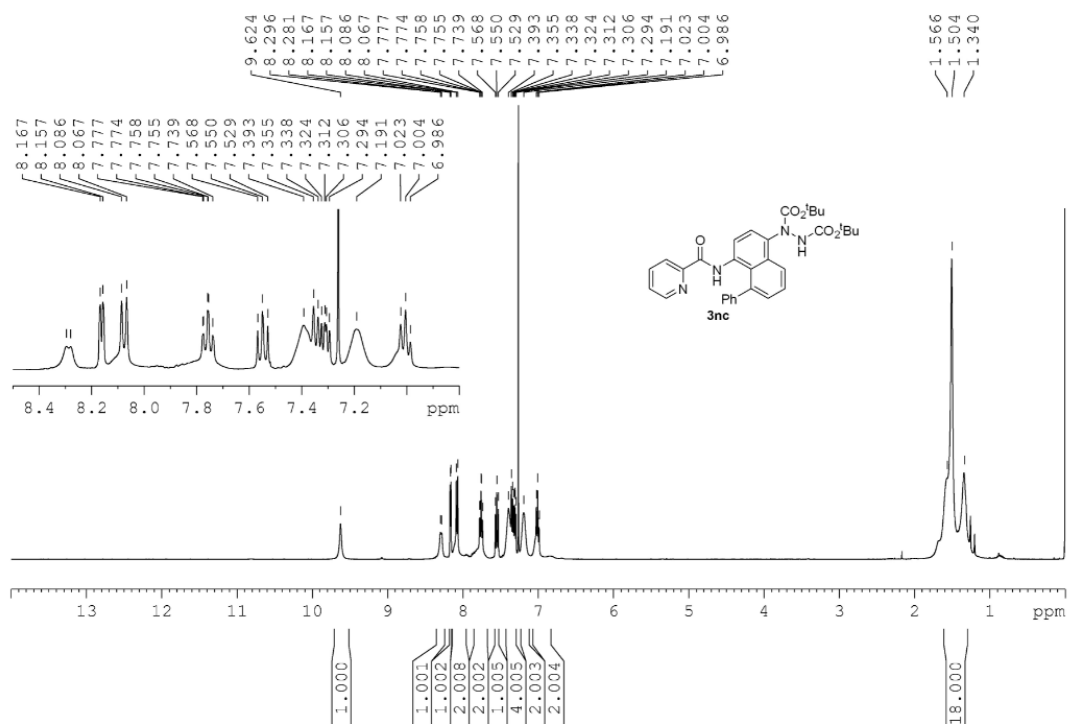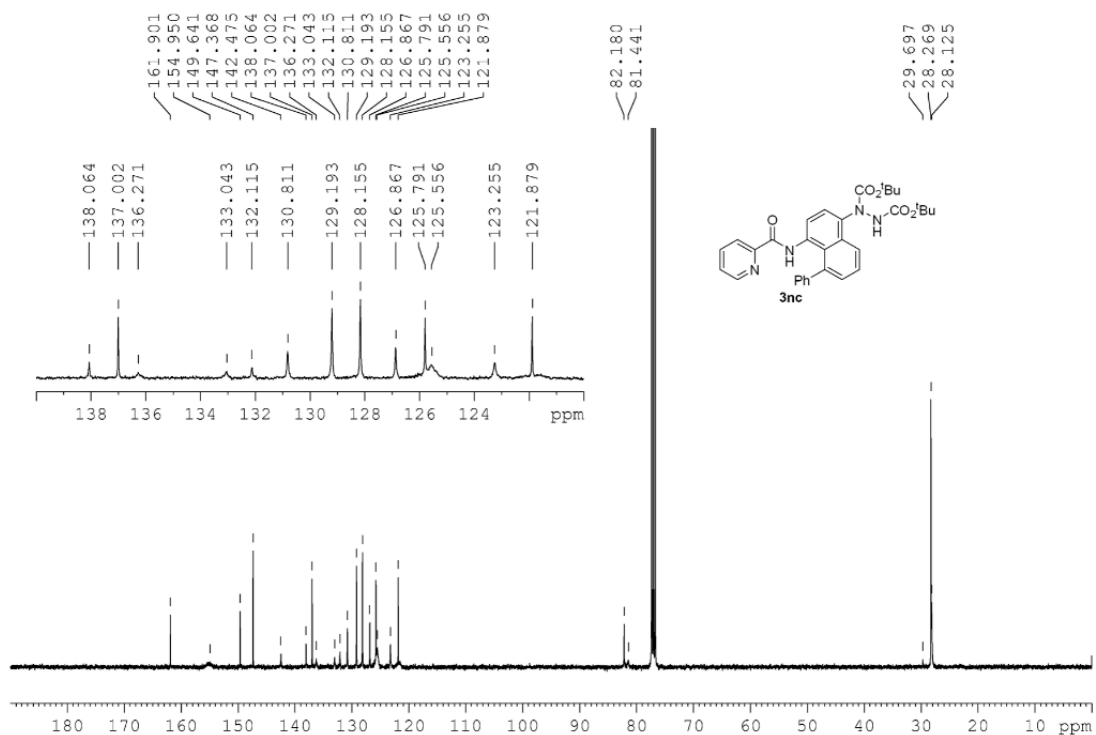

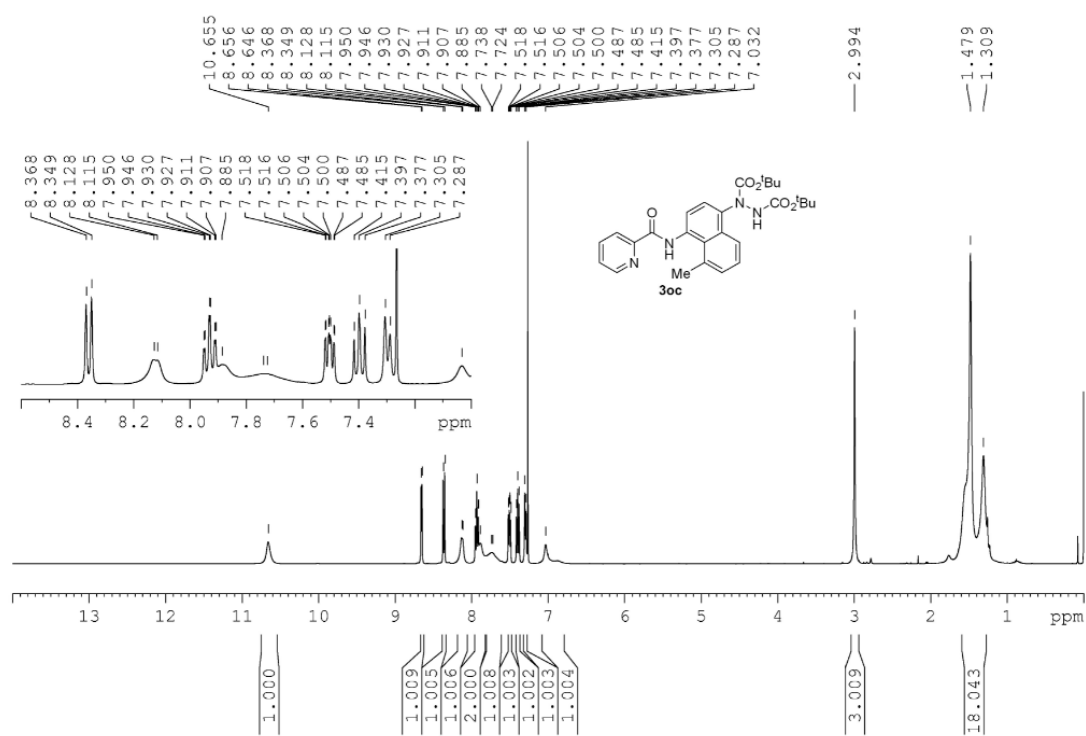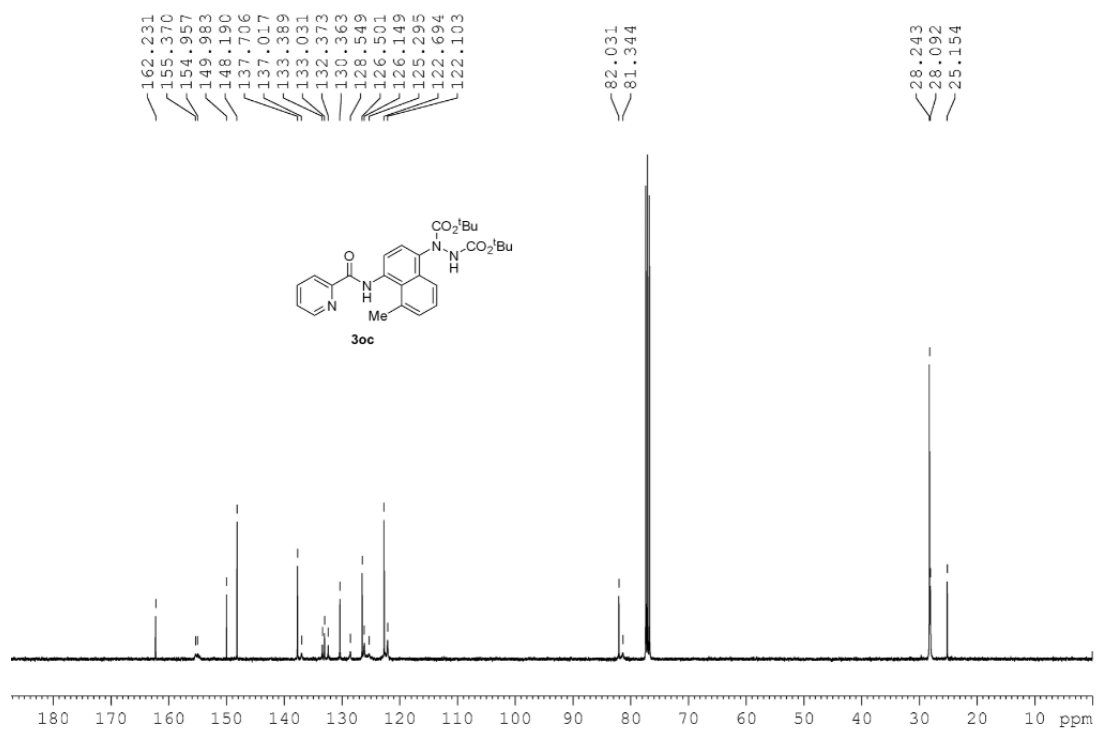

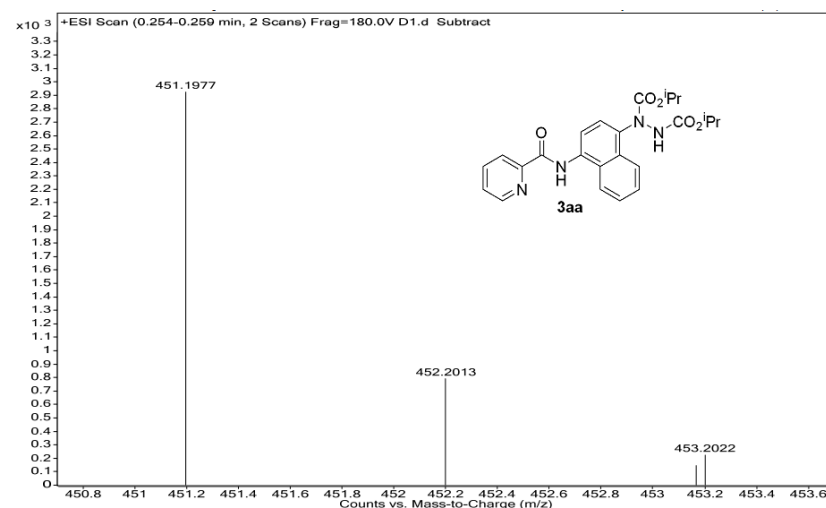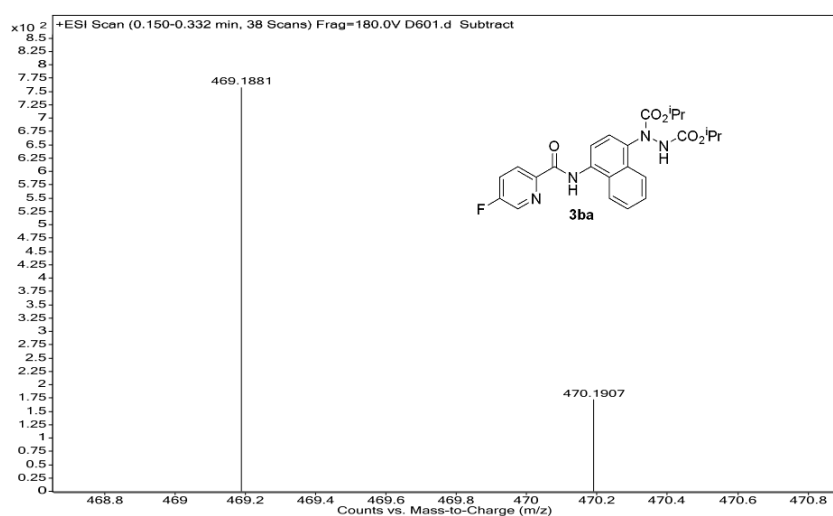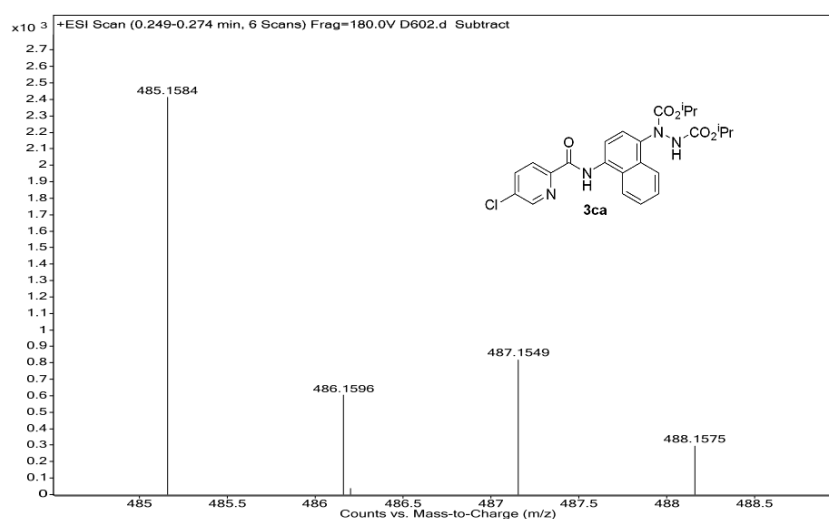

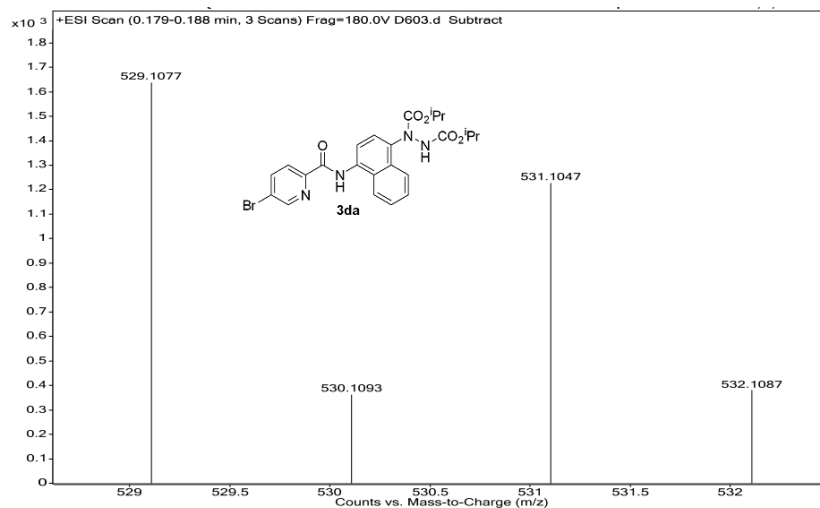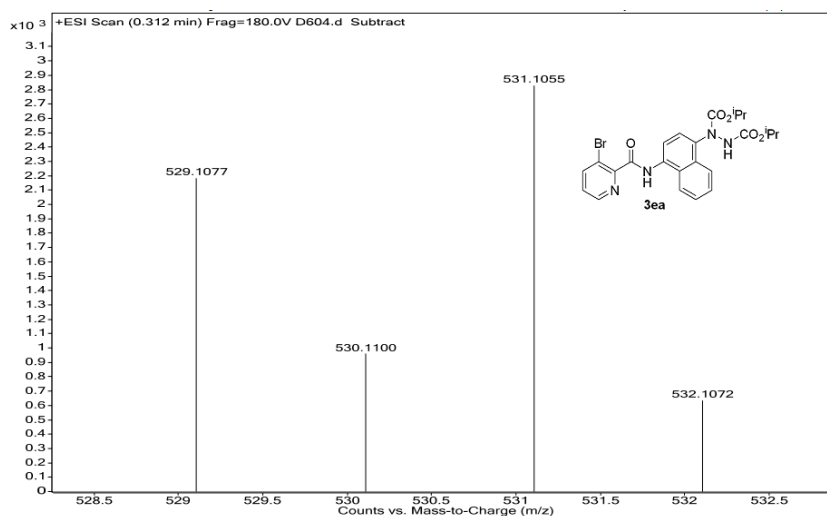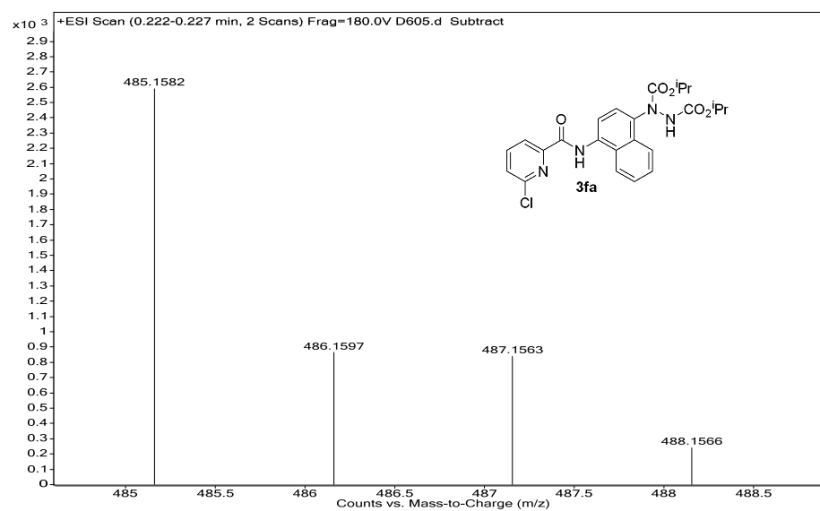

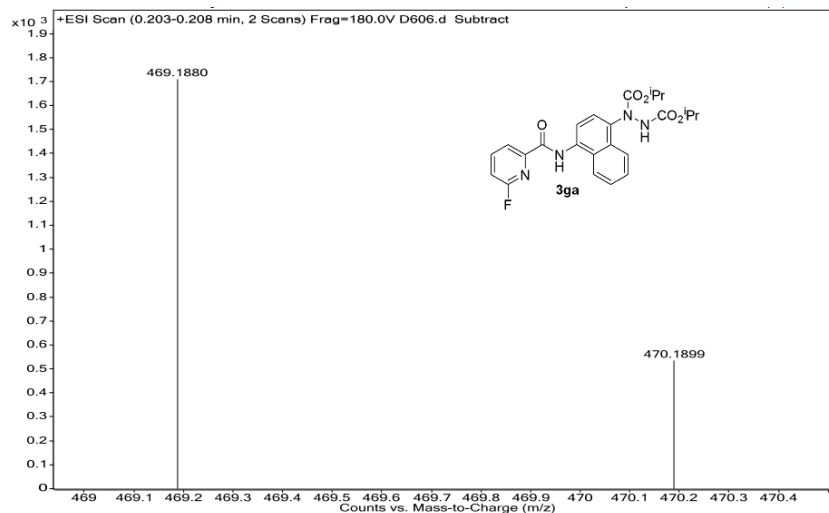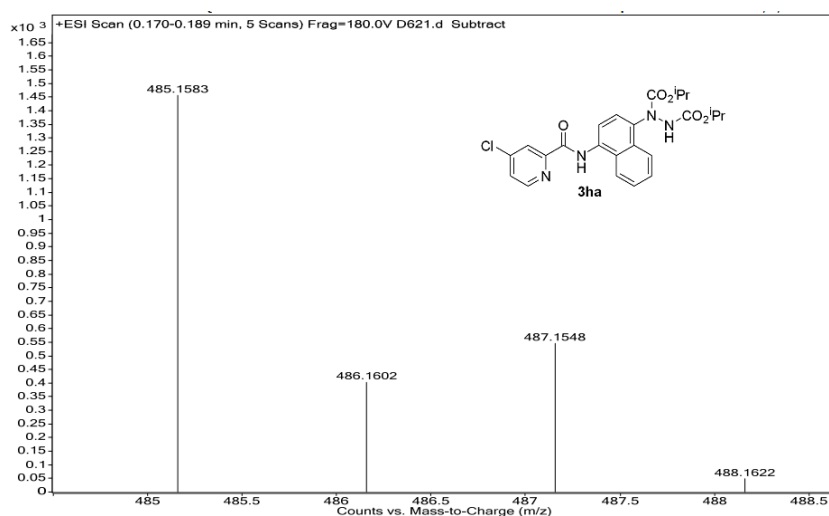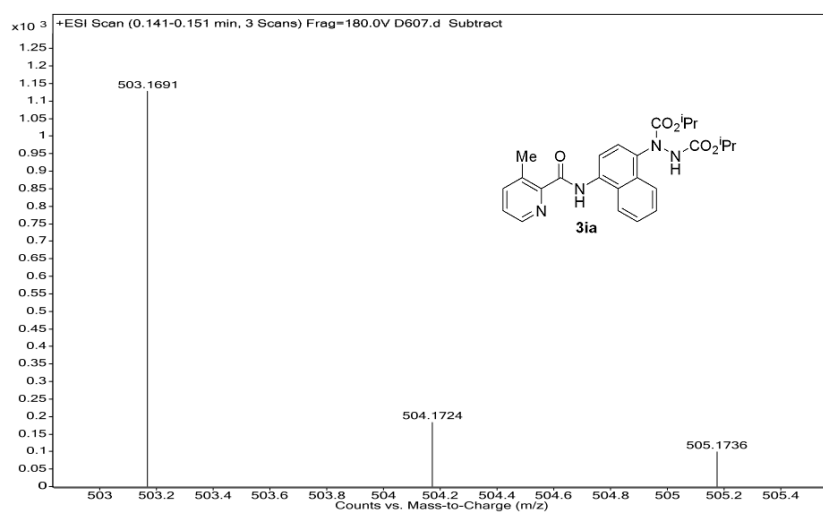

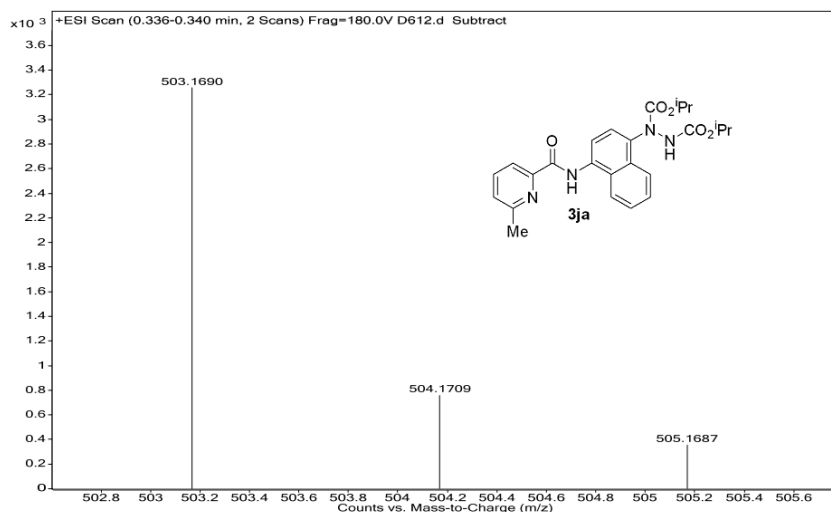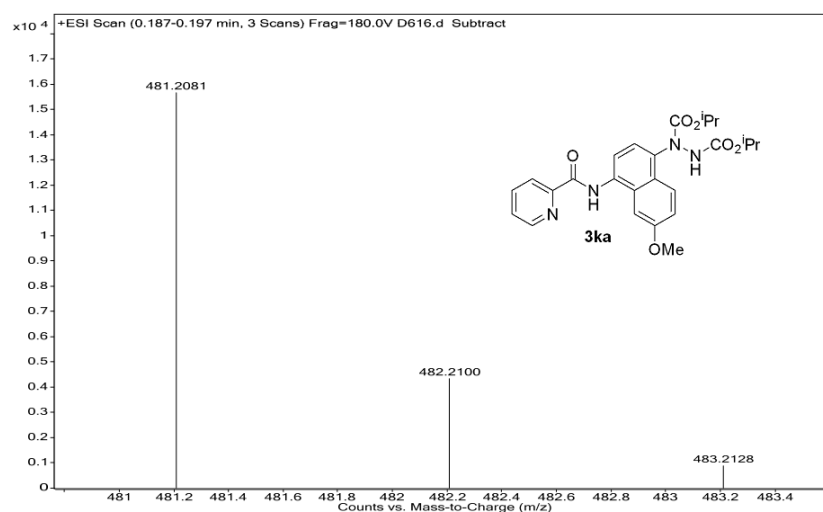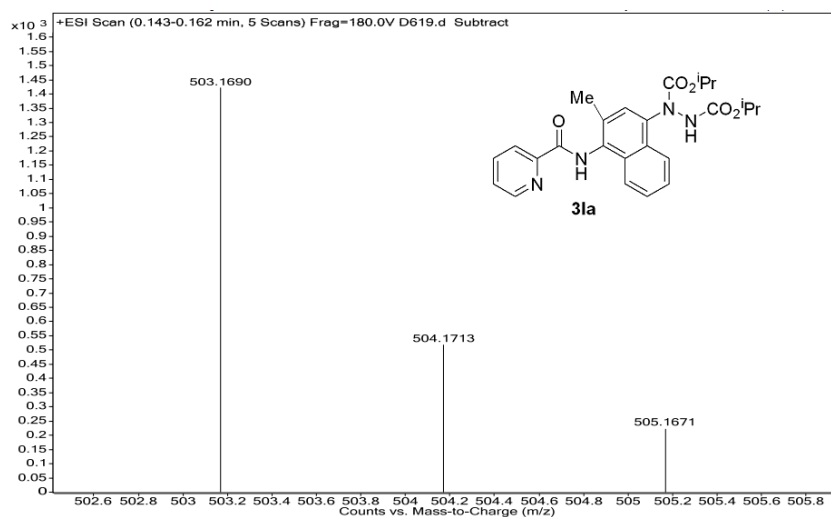

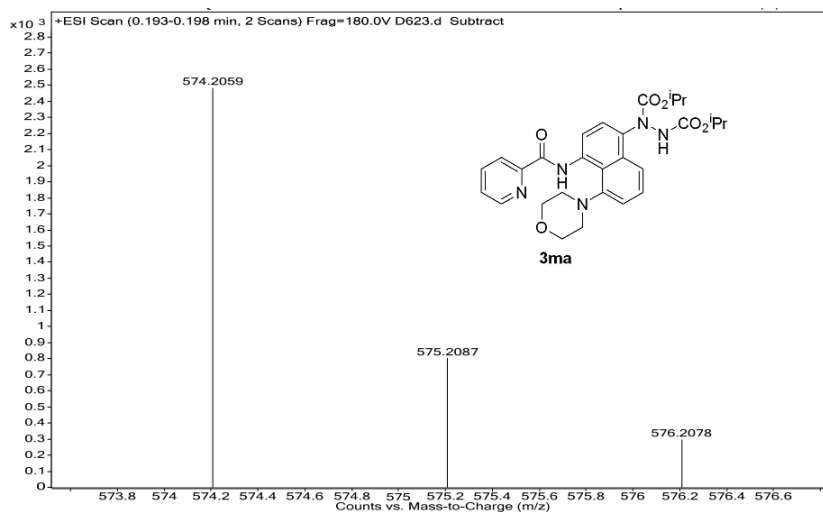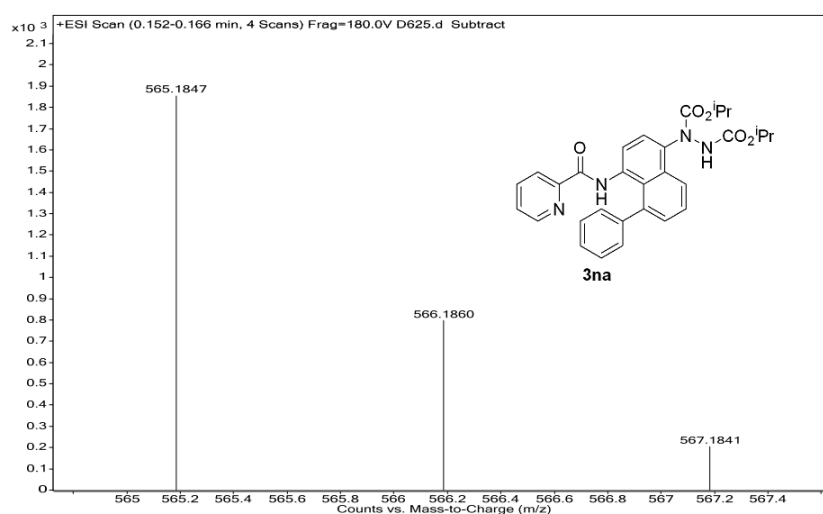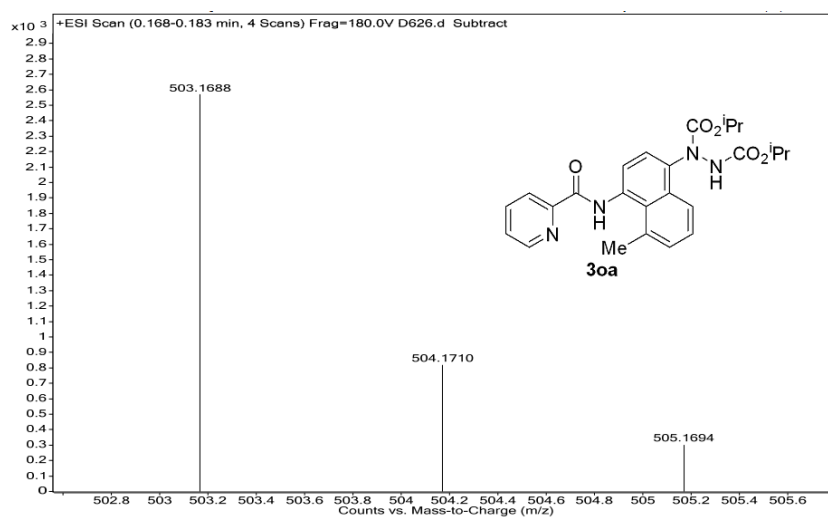

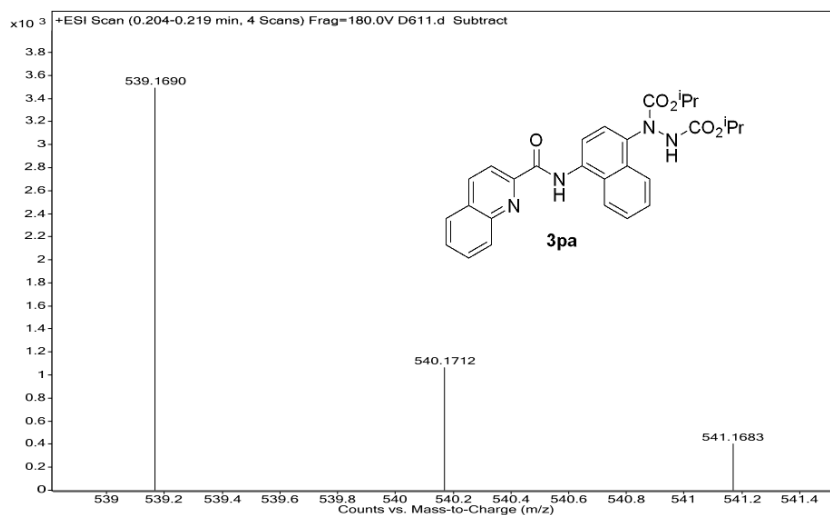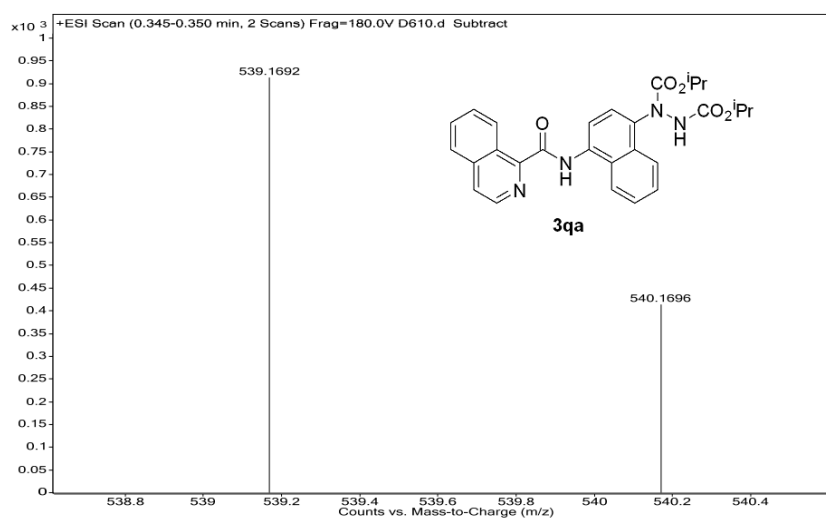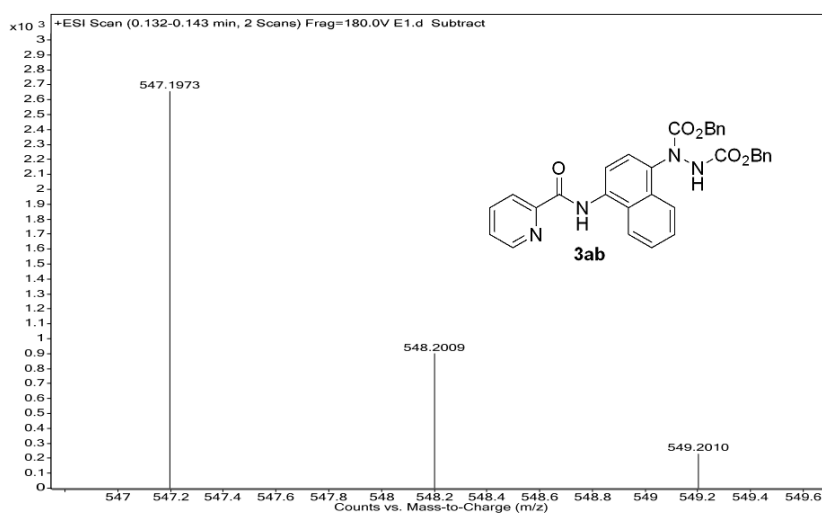



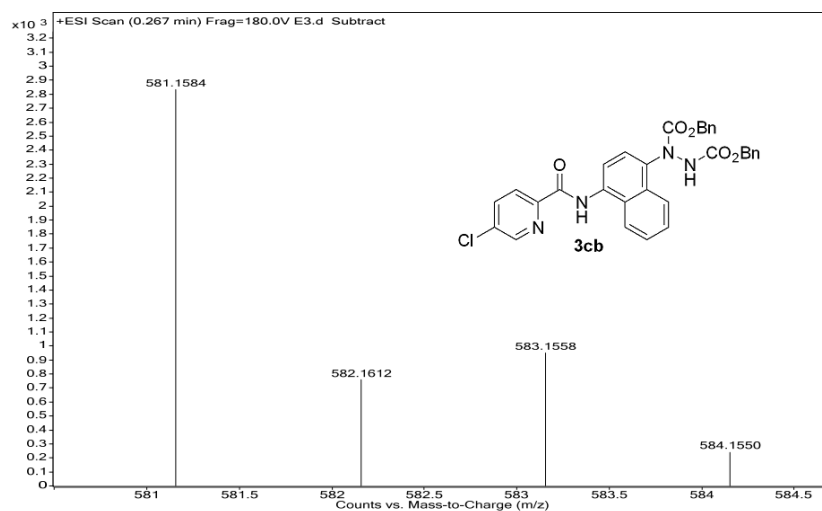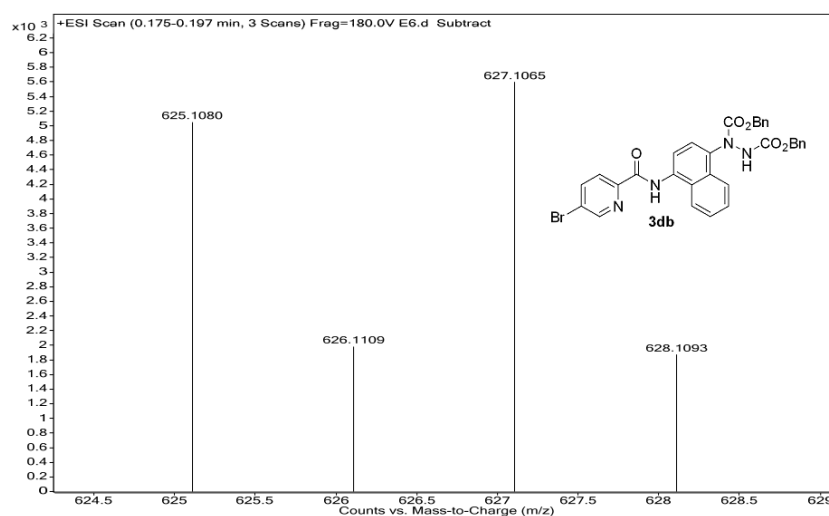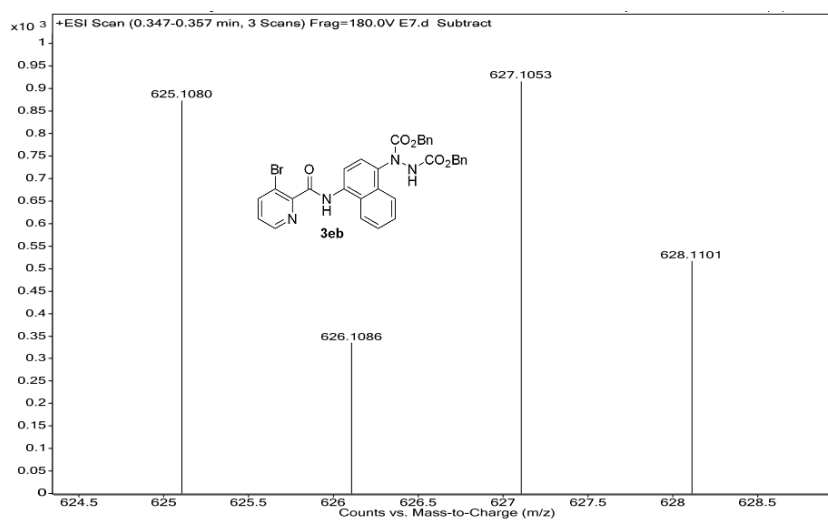

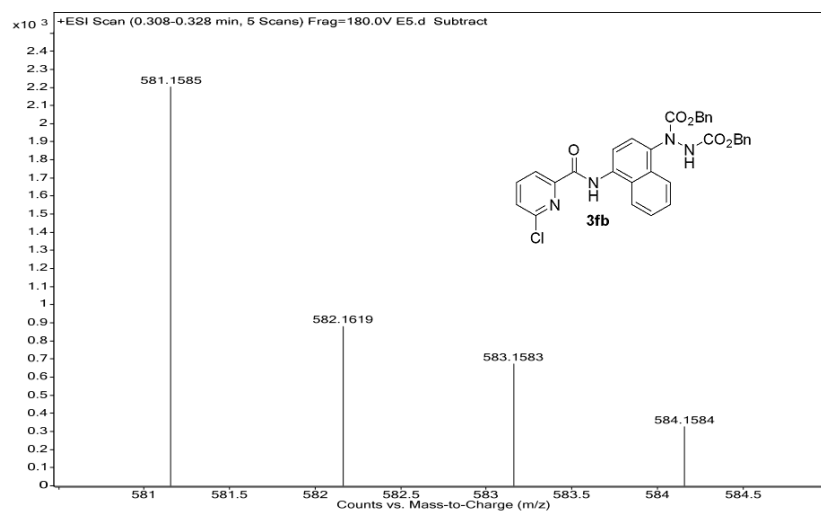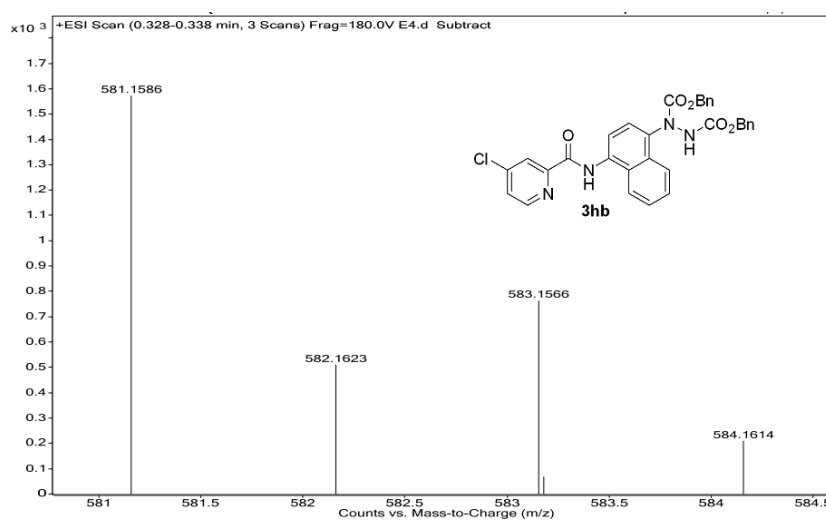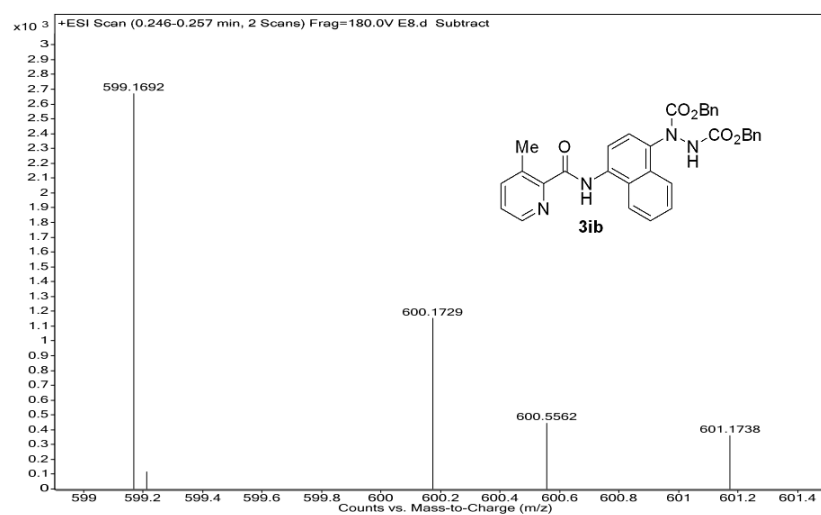

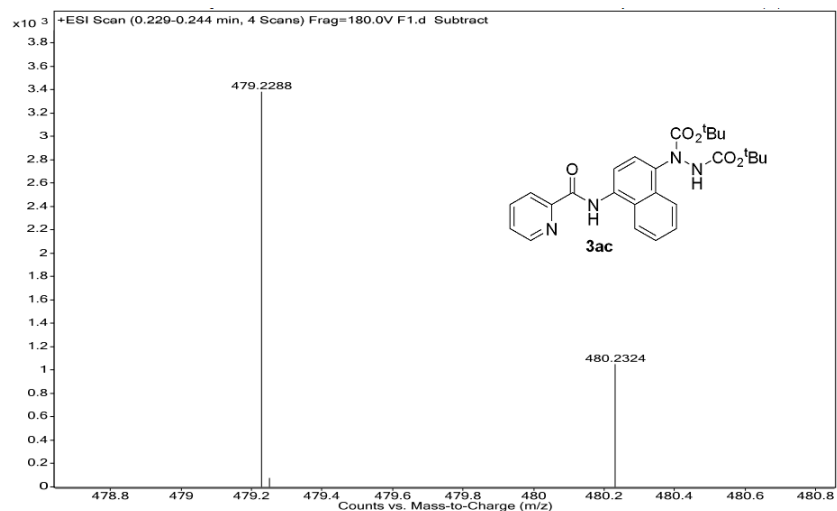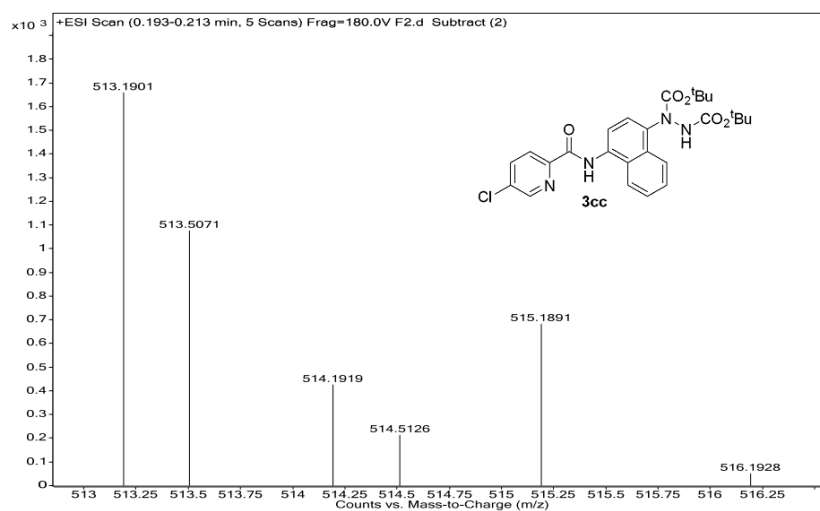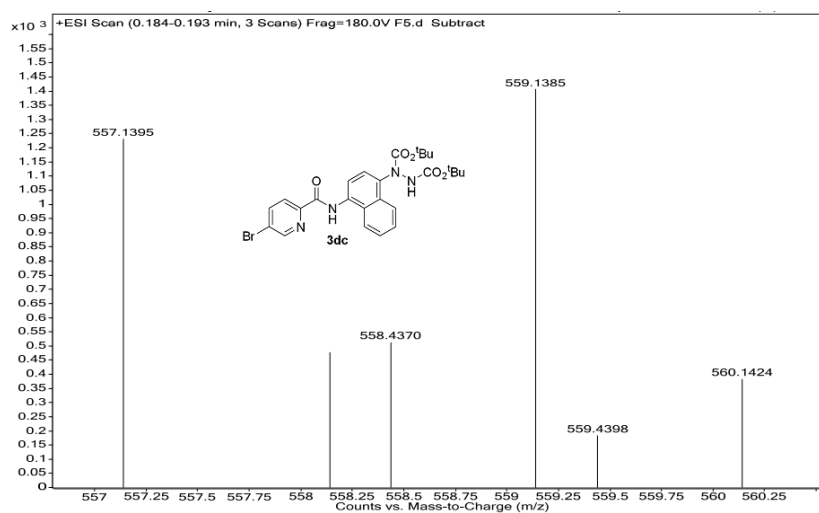

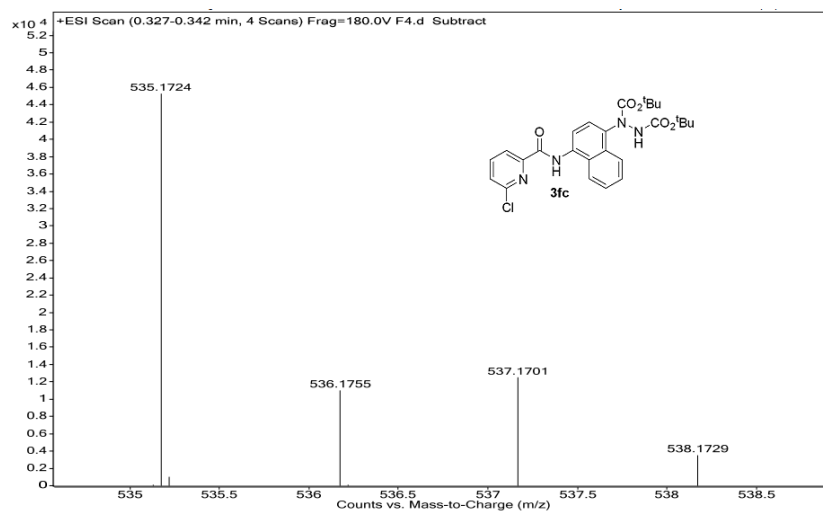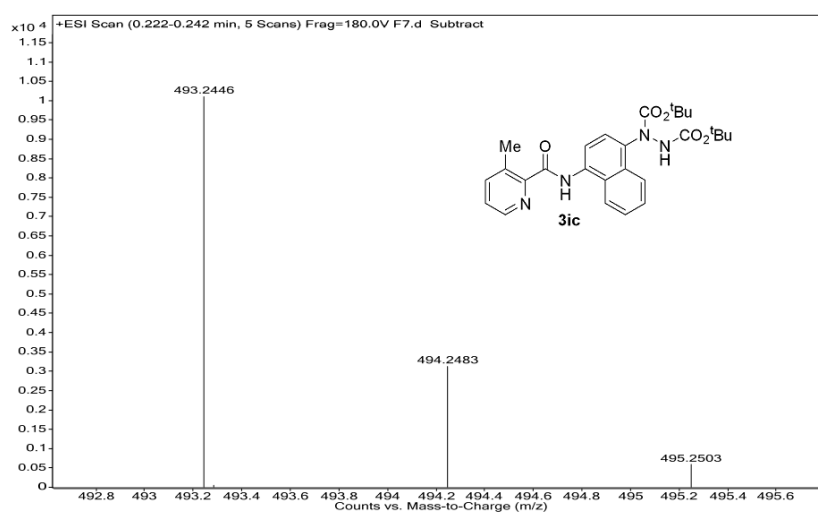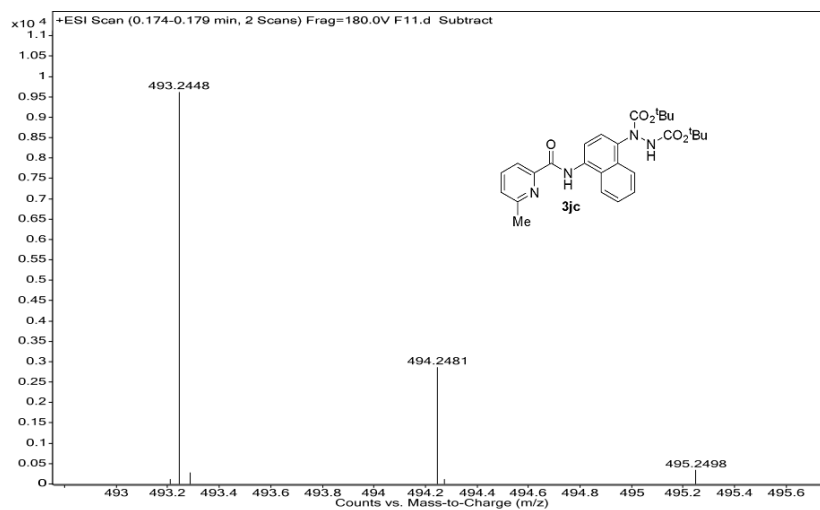

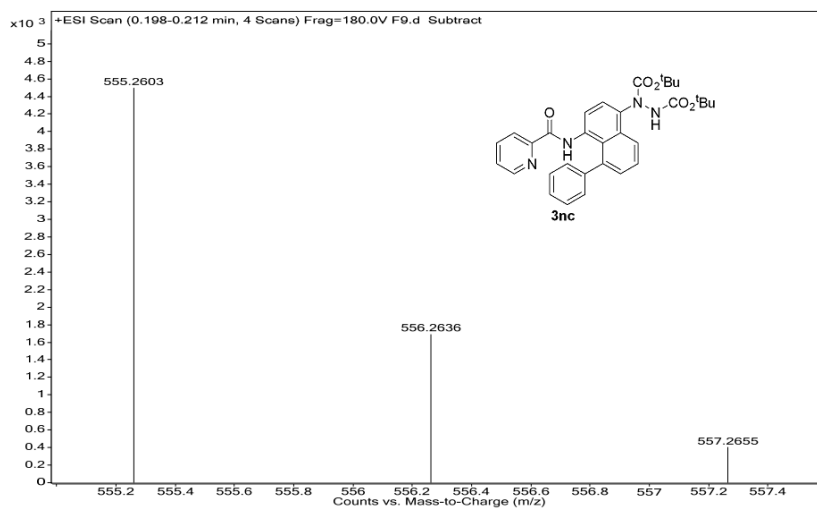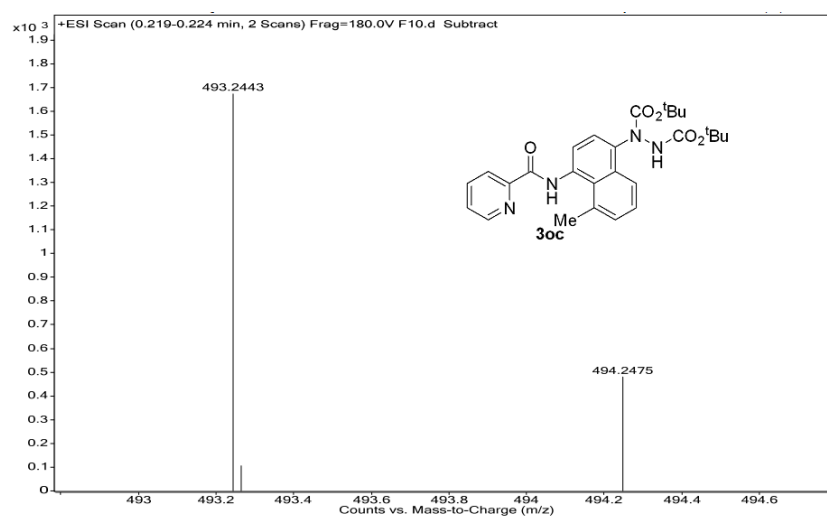

Supplement: s1 [file s1]
